# Supplementary material for: Stable Isotopes Reveal The Northern Tropical Highlands as Refugia for Extinct South American Megafauna
Source: Research Square preprint supplement (doi:10.21203/rs.3.rs-6880948/v1), 2025-06-27
Supplement: Supplementary file 1 [file 918b5183571dbf11f00cb9a7.xlsx]

## Sheet: SI_Table1
Site	Elevation (m ASL)	Latitude	Longitude	Municipality	Department	Individual	Taxa	Sample ID	Intra-tooth Sample #	Tooth	Total enamel distance from oclusal surace to ERJ (mm)	Distance from ERJ (mm)	Estimated period of mineralisation (months)	norm13C	Std. dev.	norm18O	Std. dev.	Ɛ*diet-bioapatite (Tejada et al., 2018)	Vegetation Value	Modern Comparative (Suess effect)	Vegetation Type
Anolaima	1626	4°45'56''N	74°27'53''W	Anolaima	Cundinamarca	ANL-01	Gomphothere (Notiomastodon platensis)	ANL 01 02	ANL-01-01	Upper M3 (right)	88,57	6.61	79.9 months	-1.98	0.15	-7.98	0.13		-16.6322	-15.1322	Mixed
							Gomphothere (Notiomastodon platensis)	ANL 01 03	ANL-01-02			13.29	~4.99 years	-2.5	0.14	-5.63	0.1		-17.1445	-15.6445	C4 Values
							Gomphothere (Notiomastodon platensis)	ANL 01 04	ANL-01-03			21.74		-2.1	0.11	-5.42	0.09		-16.7504	-15.2504
							Gomphothere (Notiomastodon platensis)	ANL 01 05	ANL-01-04			28.31		-1.95	0.11	-5.34	0.11		-16.6026	-15.1026
							Gomphothere (Notiomastodon platensis)	ANL 01 06	ANL-01-05			34.32		-2	0.13	-6.81	0.11		-16.6519	-15.1519
							Gomphothere (Notiomastodon platensis)	ANL 01 07	ANL-01-06			41.14		-2.25	0.15	-7.68	0.08		-16.8982	-15.3982
							Gomphothere (Notiomastodon platensis)	ANL 01 08	ANL-01-07			48.72		-1.19	0.15	-7.64	0.1		-15.8538	-14.3538
							Gomphothere (Notiomastodon platensis)	ANL 01 09	ANL-01-08			55.86		-2.56	0.15	-6.85	0.12		-17.2037	-15.7037
							Gomphothere (Notiomastodon platensis)	ANL 01 10	ANL-01-09			61.4		-2.21	0.15	-7.81	0.15		-16.8588	-15.3588
							Gomphothere (Notiomastodon platensis)	ANL 01 11	ANL-01-10			67.29		-1.9	0.19	-6.84	0.1		-16.5534	-15.0534
							Gomphothere (Notiomastodon platensis)	ANL 01 12	ANL-01-11			74.28		-3.02	0.15	-6.98	0.08		-17.6569	-16.1569
							Gomphothere (Notiomastodon platensis)	ANL 01 13	ANL-01-12			80.46		-1.39	0.15	-7.76	0.1		-16.0508	-14.5508
							Gomphothere (Notiomastodon platensis)	ANL 01 14	ANL-01-13			86.54		-2.44	0.34	-5.64	0.26		-17.0854	-15.5854
Nemocón	409?	4°25'13.72"N	74°43'45.12"W	Nemocón	Cundinamarca	NCN-01	Gomphothere (Notiomastodon platensis)	NCN 01 02	NCN-01-01	Lower m3 (left)	65,37	2.57	58.0 months	-10.22	0.17	-7.66	0.11		-24.7512	-23.2512	More C3
							Gomphothere (Notiomastodon platensis)	NCN 01 03	NCN-01-02			7.71	~3.63 years	-10.11	0.15	-8.35	0.12		-24.6428	-23.1428
							Gomphothere (Notiomastodon platensis)	NCN 01 04	NCN-01-03			15.51		-10.48	0.12	-8.29	0.11		-25.0074	-23.5074
							Gomphothere (Notiomastodon platensis)	NCN 01 05	NCN-01-04			21.71		-10.25	0.16	-8.34	0.11		-24.7808	-23.2808
							Gomphothere (Notiomastodon platensis)	NCN 01 06	NCN-01-05			28.58		-10.36	0.15	-8.77	0.08		-24.8892	-23.3892
							Gomphothere (Notiomastodon platensis)	NCN 01 07	NCN-01-06			34.67		-10.28	0.14	-7.89	0.1		-24.8103	-23.3103
							Gomphothere (Notiomastodon platensis)	NCN 01 08	NCN-01-07			41.98		-9.89	0.14	-8.96	0.11		-24.4261	-22.9261
							Gomphothere (Notiomastodon platensis)	NCN 01 09	NCN-01-08			48.47		-9.73	0.17	-8.22	0.2		-24.2684	-22.7684
							Gomphothere (Notiomastodon platensis)	NCN 01 10	NCN-01-09			54.68		-9.15	0.16	-9.2	0.23		-23.6969	-22.1969
							Gomphothere (Notiomastodon platensis)	NCN 01 11	NCN-01-10			60.59		-8.51	0.2	-10.54	0.25		-23.0663	-21.5663
Pubenza	319	4°24’21”N	74°42’12”W	Tocaima	Cundinamarca	PUB-01	Gomphothere (Notiomastodon platensis)	PUB 01 04	PUB-01-01	Upper M3 (left)	56,29	8.97	43.4 months	-1.95	0.12	-5.85	0.09		-16.6026	-15.1026	Mixed
							Gomphothere (Notiomastodon platensis)	PUB 01 05	PUB-01-02			14.52	~2.71 years	-2.36	0.15	-5.96	0.14		-17.0066	-15.5066	C4 Values
							Gomphothere (Notiomastodon platensis)	PUB 01 06	PUB-01-03			20.95		-2.85	0.12	-5.67	0.13		-17.4894	-15.9894
							Gomphothere (Notiomastodon platensis)	PUB 01 07	PUB-01-04			26.32		-2.95	0.14	-5.69	0.09		-17.5879	-16.0879
							Gomphothere (Notiomastodon platensis)	PUB 01 08	PUB-01-05			32.72		-2.84	0.16	-5.81	0.11		-17.4796	-15.9796
							Gomphothere (Notiomastodon platensis)	PUB 01 09	PUB-01-06			39.31		-3.17	0.15	-6.14	0.14		-17.8047	-16.3047
							Gomphothere (Notiomastodon platensis)	PUB 01 10	PUB-01-07			45.34		-1.4	0.18	-6.45	0.15		-16.0607	-14.5607
							Gomphothere (Notiomastodon platensis)	PUB 01 11	PUB-01-08			52.32		-1.41	0.29	-7.13	0.2		-16.0705	-14.5705
Tibitó	2565	4,59ʹ11.9”N	73,58ʹ52.4”W	Tocancipá	Cundinamarca	TBT-08	Gomphothere (Notiomastodon platensis)	TBT-08-13	TBT-08-01	Lower m3? (left)	83,75	5.33	48.9 months	-15.24	0.1	-10.63	0.08		-29.6975	-28.1975	C3
							Gomphothere (Notiomastodon platensis)	TBT-08-11	TBT-08-02			10.49	~3.05 years	-11.42	0.16	-5.38	0.12		-25.9336	-24.4336
							Gomphothere (Notiomastodon platensis)	TBT-08-10	TBT-08-03			16.07		-10.86	0.16	-4.94	0.11		-25.3818	-23.8818
							Gomphothere (Notiomastodon platensis)	TBT-08-09	TBT-08-04			21.42		-10.66	0.2	-5.53	0.2		-25.1847	-23.6847
							Gomphothere (Notiomastodon platensis)	TBT-08-08	TBT-08-05			26.91		-11.3	0.2	-5.3	0.1		-25.8154	-24.3154
							Gomphothere (Notiomastodon platensis)	TBT-08-07	TBT-08-06			33.14		-13.31	0.15	-8.22	0.11		-27.7958	-26.2958
							Gomphothere (Notiomastodon platensis)	TBT-08-06	TBT-08-07			38.79		-14.4	0.17	-5.89	0.18		-28.8698	-27.3698
							Gomphothere (Notiomastodon platensis)	TBT-08-05	TBT-08-08			44.03		-11	0.2	-4.5	0.1		-25.5198	-24.0198
							Gomphothere (Notiomastodon platensis)	TBT-08-04	TBT-08-09			49.33		-10.8	0.2	-5.2	0.1		-25.3227	-23.8227
							Gomphothere (Notiomastodon platensis)	TBT-08-03	TBT-08-10			54.22		-10.7	0.2	-6.6	0.1		-25.2242	-23.7242
						TBT-09	Gomphothere (Notiomastodon platensis)	TBT-09-09	TBT-09-01	Lower m2 (left)	59,11	7.62	39.6 months	-10.52	0.32	-4.17	0.22		-25.0468	-23.5468	C3
							Gomphothere (Notiomastodon platensis)	TBT-09-08	TBT-09-02			14.29	~2.48 years	-13.07	0.23	-7.42	0.18		-27.5594	-26.0594
							Gomphothere (Notiomastodon platensis)	TBT-09-07	TBT-09-03			21.12		-14.06	0.17	-9.75	0.11		-28.5348	-27.0348
							Gomphothere (Notiomastodon platensis)	TBT-09-06	TBT-09-04			27.26		-11.51	0.29	-6.48	0.23		-26.0223	-24.5223
							Gomphothere (Notiomastodon platensis)	TBT-09-05	TBT-09-05			33.93		-11.95	0.23	-5.72	0.17		-26.4558	-24.9558
							Gomphothere (Notiomastodon platensis)	TBT-09-04	TBT-09-06			40.77		-9.88	0.12	-7.98	0.19		-24.4162	-22.9162
							Gomphothere (Notiomastodon platensis)	TBT-09-03	TBT-09-07			47.22		-11.6	0.2	-5	0.1		-26.1109	-24.6109
						TBT-10	Gomphothere (Notiomastodon platensis)	TBT-10-09	TBT-10-01	Molar (Ind.)	68,41	12.15	51.5 months	-6.35	0.28	-5.52	0.19		-20.938	-19.438	Mixed
							Gomphothere (Notiomastodon platensis)	TBT-10-08	TBT-10-02			20.06	~3.22 years	-6.55	0.33	-5.19	0.2		-21.1351	-19.6351	C3/C4
							Gomphothere (Notiomastodon platensis)	TBT-10-07	TBT-10-03			27.05		-6.83	0.32	-5.39	0.22		-21.411	-19.911
							Gomphothere (Notiomastodon platensis)	TBT-10-06	TBT-10-04			35.56		-6.77	0.31	-5.81	0.22		-21.3519	-19.8519
							Gomphothere (Notiomastodon platensis)	TBT-10-05	TBT-10-05			42.18		-7.01	0.29	-5.48	0.26		-21.5883	-20.0883
							Gomphothere (Notiomastodon platensis)	TBT-10-04	TBT-10-06			48.82		-7.15	0.3	-5.14	0.22		-21.7263	-20.2263
							Gomphothere (Notiomastodon platensis)	TBT-10-03	TBT-10-07			55.18		-7.35	0.3	-5.77	0.26		-21.9233	-20.4233
							Gomphothere (Notiomastodon platensis)	TBT-10-02	TBT-10-08			61.98		-7.3	0.32	-5.52	0.25		-21.8741	-20.3741
							Gomphothere (Notiomastodon platensis)	TBT-10-01	TBT-10-09			63.72		-6.96	0.34	-5.31	0.22		-21.5391	-20.0391
						TBT-11	Gomphothere (Notiomastodon platensis)	TBT-11-09	TBT-11-01	Upper M3 (right)	101,9	17.69	42.3 months	-7.6	0.3	-7.4	0.2		-22.1697	-20.6697	Mixed
							Gomphothere (Notiomastodon platensis)	TBT-11-08	TBT-11-02			26.14	~3.08 years	-11.2	0.3	-11	0.1		-25.7168	-24.2168	More C3
							Gomphothere (Notiomastodon platensis)	TBT-11-07	TBT-11-03			33.85		-8.81	0.26	-7.57	0.18		-23.3619	-21.8619
							Gomphothere (Notiomastodon platensis)	TBT-11-06	TBT-11-04			39.76		-9.78	0.3	-8.69	0.13		-24.3177	-22.8177
							Gomphothere (Notiomastodon platensis)	TBT-11-05	TBT-11-05			46.34		-7.9	0.31	-6.1	0.25		-22.4653	-20.9653
							Gomphothere (Notiomastodon platensis)	TBT-11-04	TBT-11-06			54.4		-8.59	0.28	-5.84	0.24		-23.1451	-21.6451
							Gomphothere (Notiomastodon platensis)	TBT-11-03	TBT-11-07			60.55		-7.73	0.31	-5.8	0.2		-22.2978	-20.7978
							Gomphothere (Notiomastodon platensis)	TBT-11-02	TBT-11-08			66.98		-8.67	0.24	-7.05	0.19		-23.224	-21.724
						TBT-01	Equus (Amerihippus) sp. lasallei	TBT-01-06	TBT-01-01	Lower m3 (right)	27,73	3.81	7.75667	-7.3	0.2	-6.7	0.1	14.6	-21.5849	-20.0849	Mixed
							Equus (Amerihippus) sp. lasallei	TBT-01-05	TBT-01-02			8.89	~0.65 years	-7.9	0.2	-7.3	0.1		-22.1762	-20.6762	More C3
							Equus (Amerihippus) sp. lasallei	TBT-01-04	TBT-01-03			14.47		-6.7	0.2	-5.8	0.2		-20.9935	-19.4935	Some C4
							Equus (Amerihippus) sp. lasallei	TBT-01-03	TBT-01-04			21.04		-8	0.2	-7.8	0.1		-22.2748	-20.7748
							Equus (Amerihippus) sp. lasallei	TBT-01-02	TBT-01-05			27.08		-7.9	0.2	-6.6	0.1		-22.1762	-20.6762
						TBT-02	Equus (Amerihippus) sp. lasallei	TBT-02-05	TBT-02-01	Lower m3 (right)	25,83	4.49	6.58	-9.5	0.2	-5.2	0.1		-23.7532	-22.2532	C3
							Equus (Amerihippus) sp. lasallei	TBT-02-04	TBT-02-02			11.07	~0.55 years	-10.3	0.2	-5.3	0.1		-24.5417	-23.0417
							Equus (Amerihippus) sp. lasallei	TBT-02-03	TBT-02-03			17.36		-11.8	0.1	-7.5	0.1		-26.0201	-24.5201
							Equus (Amerihippus) sp. lasallei	TBT-02-02	TBT-02-04			24.23		-10	0.2	-5.8	0.1		-24.246	-22.746
						TBT-03	Equus (Amerihippus) sp. lasallei	TBT-03-07	TBT-03-01	Lower m3 (left)	45,27	5.76	10.3867	-7	0.2	-7.1	0.2		-21.2892	-19.7892	Mixed
							Equus (Amerihippus) sp. lasallei	TBT-03-06	TBT-03-02			12.07	~0.87 years	-8	0.2	-7.2	0.1		-22.2748	-20.7748	More C3
							Equus (Amerihippus) sp. lasallei	TBT-03-05	TBT-03-03			18.01		-7.6	0.1	-7.1	0.1		-21.8805	-20.3805	Some C4
							Equus (Amerihippus) sp. lasallei	TBT-03-04	TBT-03-04			23.77		-8.4	0.2	-8.2	0.1		-22.669	-21.169
							Equus (Amerihippus) sp. lasallei	TBT-03-03	TBT-03-05			29.93		-7.6	0.2	-7.4	0.1		-21.8805	-20.3805
							Equus (Amerihippus) sp. lasallei	TBT-03-02	TBT-03-06			36.92		-7.9	0.2	-7.1	0.1		-22.1762	-20.6762
						TBT-04	Equus (Amerihippus) sp. lasallei	TBT-04-05	TBT-04-01	Upper M3 (right)	40,73	9.61	6.96333	-9	0.3	-4.7	0.2		-23.2604	-21.7604	C3
							Equus (Amerihippus) sp. lasallei	TBT-04-04	TBT-04-02			16.72	~0.58 years	-10.6	0.2	-7.6	0.1		-24.8374	-23.3374
							Equus (Amerihippus) sp. lasallei	TBT-04-03	TBT-04-03			23.26		-9.6	0.2	-6	0.1		-23.8518	-22.3518
							Equus (Amerihippus) sp. lasallei	TBT-04-02	TBT-04-04			30.5		-9.9	0.2	-5.4	0.1		-24.1474	-22.6474
						TBT-07	Equus (Amerihippus) sp. lasallei	TBT-07-09	TBT-07-01	Lower p4 (left)	57,96	8.41	15.78	-10.6	0.2	-7.9	0.1		-24.8374	-23.3374	C3
							Equus (Amerihippus) sp. lasallei	TBT-07-08	TBT-07-02			15.24	~1.32 years	-13.5	0.28	-8.22	0.32		-27.6956	-26.1956
							Equus (Amerihippus) sp. lasallei	TBT-07-07	TBT-07-03			21.79		-10.7	0.1	-7.8	0.1		-24.9359	-23.4359
							Equus (Amerihippus) sp. lasallei	TBT-07-06	TBT-07-04			28.55		-10.6	0.2	-7.4	0.1		-24.8374	-23.3374
							Equus (Amerihippus) sp. lasallei	TBT-07-05	TBT-07-05			35.25		-9.8	0.2	-5.5	0.1		-24.0489	-22.5489
							Equus (Amerihippus) sp. lasallei	TBT-07-04	TBT-07-06			41.74		-8.9	0.2	-5	0.1		-23.1618	-21.6618
							Equus (Amerihippus) sp. lasallei	TBT-07-03	TBT-07-07			49.18		-8.6	0.2	-4.3	0.1		-22.8662	-21.3662
							Equus (Amerihippus) sp. lasallei	TBT-07-02	TBT-07-08			55.75		-10.8	0.1	-6.7	0.1		-25.0345	-23.5345
Luruaco-Atlánti				Luruaco	Atlántico	LUR-01	Gomphothere (Notiomastodon platensis)	LUR-01-06	LUR-01-01	Lower m2? (right)	14,08	2.82	10.5 months	-2.2	0.2	-5.9	0.1		-16.849	-15.349	Mixed
							Gomphothere (Notiomastodon platensis)	LUR-01-05	LUR-01-02			4.68	~0.65 years	-3.4	0.2	-5.8	0.1		-18.0313	-16.5313	C4 Values
							Gomphothere (Notiomastodon platensis)	LUR-01-04	LUR-01-03			7.68		-2.3	0.2	-6	0.1		-16.9475	-15.4475
							Gomphothere (Notiomastodon platensis)	LUR-01-03	LUR-01-04			10.45		-3.6	0.2	-5.5	0.1		-18.2284	-16.7284
							Gomphothere (Notiomastodon platensis)	LUR-01-02	LUR-01-05			13.35		-3.5	0.2	-5.7	0.1		-18.1299	-16.6299
Zanjón				Mosquera	Cundinamarca	ZJN-01	Gomphothere (Notiomastodon platensis)	ZJN 01 03	ZJN-01-01	Upper M3 (left)	72,49	8.87	35.8 months	-10.61	0.13	-7.45	0.13	14.9	-25.1355	-23.6355	Mixed
							Gomphothere (Notiomastodon platensis)	ZJN 01 04	ZJN-01-02			15.51	~2.98 years	-9.43	0.39	-7.91	0.14		-23.9728	-22.4728	More C3
							Gomphothere (Notiomastodon platensis)	ZJN 01 05	ZJN-01-03			21.75		-8.76	0.23	-8.16	0.09		-23.3126	-21.8126
							Gomphothere (Notiomastodon platensis)	ZJN 01 06	ZJN-01-04			27.58		-8.2	0.25	-7.69	0.24		-22.7609	-21.2609
							Gomphothere (Notiomastodon platensis)	ZJN 01 07	ZJN-01-05			34.97		-8.47	0.15	-8.52	0.39		-23.0269	-21.5269
							Gomphothere (Notiomastodon platensis)	ZJN 01 08	ZJN-01-06			41.94		-8.92	0.14	-8.27	0.21		-23.4703	-21.9703
							Gomphothere (Notiomastodon platensis)	ZJN 01 09	ZJN-01-07			48.78		-9.09	0.11	-9.18	0.28		-23.6378	-22.1378
							Gomphothere (Notiomastodon platensis)	ZJN 01 10	ZJN-01-08			56.61		-8.81	0.17	-10.33	0.39		-23.3619	-21.8619

## Sheet: SI_Table2
Region	Country	Citation	Original Citation	Age	Taxa	Taxa Species	Locality (country)	Sample ID	Skeletal tissue	Estimated (degrees minutes seconds)	Latitude (calculated)	Longitude (calculated)	Altitude m a.s.l.	C13VPDB	O18VPDB	14 C age ±1σ on st (14C yr BP)	Full Citation	GPS Citation	Isotope Citation	Chronology Citation	Notes
Northern Andes	Colombia	This Study	This Study	TP-EH	Gomphotheriidae	Notiomastodon platensis	Anolaima (Co)	ANL-01	Enamel	4°45'56''N; 74°27'53''W	4.7655	-74.4647	1626	-2.25	-6.08	10,850 ± 30 yr BP; 12,771 –12,690 cal yr BP 2σ	This Study	Zorro-Luján, Catalina María, Leslie F. Noè, Marcela Gómez-Pérez, Sandrine Grouard, Andrés Chaparro, and Saúl Torres. “Vertebral Lesions in Notiomastodon Platensis, Gomphotheriidae, from Anolaima, Colombia.” Quaternary Research, 2022, 1–15. https://doi.org/10.1017/qua.2022.49.
Northern Andes	Colombia	Doming et al., 2012	MacFadden et al. (1999)	LP	Equus	Equus sp.	La Venta (Co)	ING 184268	Enamel	3°14′04″N; 75°12′15″W	3.2344	-75.2041	440	-2.2	1.44		Domingo, Laura, José Luis Prado, and María Teresa Alberdi. “The Effect of Paleoecology and Paleobiogeography on Stable Isotopes of Quaternary Mammals from South America.” Quaternary Science Reviews 55 (November 8, 2012): 103–13. https://doi.org/10.1016/j.quascirev.2012.08.017.		Macfadden, B.J., Cerling, T.E., Harris, J.M., and Prado, J. (1999). Ancient latitudinal gradients of C3/C4 grasses interpreted from stable isotopes of New World Pleistocene horse (Equus) teeth. Global Ecology and Biogeography 8, 137–149. https://doi.org/10.1046/j.1466-822X.1999.00127.x.
Northern Andes	Colombia	Doming et al., 2012	MacFadden et al. (1999)	LP	Equus	Equus sp.	La Venta (Co)	UCMP 38100	Enamel	3°14′04″N; 75°12′15″W	3.2344	-75.2041	440	-0.7	-0.99		Domingo, Laura, José Luis Prado, and María Teresa Alberdi. “The Effect of Paleoecology and Paleobiogeography on Stable Isotopes of Quaternary Mammals from South America.” Quaternary Science Reviews 55 (November 8, 2012): 103–13. https://doi.org/10.1016/j.quascirev.2012.08.017.		Macfadden, B.J., Cerling, T.E., Harris, J.M., and Prado, J. (1999). Ancient latitudinal gradients of C3/C4 grasses interpreted from stable isotopes of New World Pleistocene horse (Equus) teeth. Global Ecology and Biogeography 8, 137–149. https://doi.org/10.1046/j.1466-822X.1999.00127.x.
Northern Andes	Colombia	This Study	This Study	LP	Gomphotheriidae	Notiomastodon platensis	Luraco (Co)	LUR-01	Enamel	UNC-ICN Museum Sample			50	-2.77	-5.43		This Study	Correal-Urrego, G. (1993). Nuevas evidencias culturales pleistocénicas y megafauna en Colombia. BAF 8, 3–12.
Northern Andes	Colombia	This Study	This Study	LP	Gomphotheriidae	Notiomastodon platensis	Nemocón (Co)	NCN-01	Enamel	UNC-ICN Museum Sample			409	-9.69	-8.24		This Study				Correal-Urrego, G., and Pinto Nolla, M. (1982). Fundación de Investigaciones Arqueológicas Nacionales / Investigaciones arqueológicas en el municipio de Zipacón, Cundinamarca’. BMO, 23–34.
Northern Andes	Colombia	This Study	This Study	LP	Gomphotheriidae	Notiomastodon platensis	Pubenza (Co)	PUB-01	Enamel	4°24’21”N; 74°42’12”W	4.4058	-74.7033	319	-3.27	-5.95	16,400±420 (Col. 700, GrN 19.857)	This Study	Cadena, Edwin R., Carlos M. Jaramillo, and María Paramo. “The First Late Pleistocene Record Of Kinosternon (Cryptodira: Kinosternidae) Turtles For Northern South America, Pubenza Locality, Colombia.” South American Journal of Herpetology / Sociedade Brasileira de Herpetologia 2, no. Dec 2007 (January 24, 2009): 201–5. https://doi.org/10.2994/1808-9798(2007)2[201:TFLPRO]2.0.CO;2.
Northern Andes	Colombia	This Study	This Study	TP-EH	Equus	Equus (Amerihippus) sp. lasallei	Tibito (Co)	TBT-04	Enamel	4°59'11.9”N; 73°58'52.4”W	4.9866	-73.9812	2565	-13.3	-11.4	11,740±110 (Grn 9375)	This Study	Mothé, Dimila, Carlos Jaramillo, Gheny Krigsfeld Shuster, Nychollas Oikawa, and Sebastian Escobar-Florez. “Ain’t No Mountain High Enough? New Records of Notiomastodon Platensis (Mammalia, Proboscidea) from Colombia and the Quaternary Dry Corridor of the Cauca Valley.” Historical Biology 36, no. 2 (February 1, 2024): 241–52. https://doi.org/10.1080/08912963.2022.2155955.
Northern Andes	Colombia	This Study	This Study	TP-EH	Equus	Equus (Amerihippus) sp. lasallei	Tibito (Co)	TBT-05	Enamel	4°59'11.9”N; 73°58'52.4”W	4.9866	-73.9812	2565	-11.5	-7.9	11,740±110 (Grn 9375)	This Study	Mothé, Dimila, Carlos Jaramillo, Gheny Krigsfeld Shuster, Nychollas Oikawa, and Sebastian Escobar-Florez. “Ain’t No Mountain High Enough? New Records of Notiomastodon Platensis (Mammalia, Proboscidea) from Colombia and the Quaternary Dry Corridor of the Cauca Valley.” Historical Biology 36, no. 2 (February 1, 2024): 241–52. https://doi.org/10.1080/08912963.2022.2155955.
Northern Andes	Colombia	This Study	This Study	TP-EH	Equus	Equus (Amerihippus) sp. lasallei	Tibito (Co)	TBT-03	Enamel	4°59'11.9”N; 73°58'52.4”W	4.9866	-73.9812	2565	-10.82	-4.88	11,740±110 (Grn 9375)	This Study	Mothé, Dimila, Carlos Jaramillo, Gheny Krigsfeld Shuster, Nychollas Oikawa, and Sebastian Escobar-Florez. “Ain’t No Mountain High Enough? New Records of Notiomastodon Platensis (Mammalia, Proboscidea) from Colombia and the Quaternary Dry Corridor of the Cauca Valley.” Historical Biology 36, no. 2 (February 1, 2024): 241–52. https://doi.org/10.1080/08912963.2022.2155955.
Northern Andes	Colombia	This Study	This Study	TP-EH	Equus	Equus (Amerihippus) sp. lasallei	Tibito (Co)	TBT-01	Enamel	4°59'11.9”N; 73°58'52.4”W	4.9866	-73.9812	2565	-10.3	-9.6	11,740±110 (Grn 9375)	This Study	Mothé, Dimila, Carlos Jaramillo, Gheny Krigsfeld Shuster, Nychollas Oikawa, and Sebastian Escobar-Florez. “Ain’t No Mountain High Enough? New Records of Notiomastodon Platensis (Mammalia, Proboscidea) from Colombia and the Quaternary Dry Corridor of the Cauca Valley.” Historical Biology 36, no. 2 (February 1, 2024): 241–52. https://doi.org/10.1080/08912963.2022.2155955.
Northern Andes	Colombia	This Study	This Study	TP-EH	Equus	Equus (Amerihippus) sp. lasallei	Tibito (Co)	TBT-02	Enamel	4°59'11.9”N; 73°58'52.4”W	4.9866	-73.9812	2565	-10.1	-5.1	11,740±110 (Grn 9375)	This Study	Mothé, Dimila, Carlos Jaramillo, Gheny Krigsfeld Shuster, Nychollas Oikawa, and Sebastian Escobar-Florez. “Ain’t No Mountain High Enough? New Records of Notiomastodon Platensis (Mammalia, Proboscidea) from Colombia and the Quaternary Dry Corridor of the Cauca Valley.” Historical Biology 36, no. 2 (February 1, 2024): 241–52. https://doi.org/10.1080/08912963.2022.2155955.
Northern Andes	Colombia	This Study	This Study	TP-EH	Equus	Equus (Amerihippus) sp. lasallei	Tibito (Co)	TBT-07	Enamel	4°59'11.9”N; 73°58'52.4”W	4.9866	-73.9812	2565	-8.4	-3.3	11,740±110 (Grn 9375)	This Study	Mothé, Dimila, Carlos Jaramillo, Gheny Krigsfeld Shuster, Nychollas Oikawa, and Sebastian Escobar-Florez. “Ain’t No Mountain High Enough? New Records of Notiomastodon Platensis (Mammalia, Proboscidea) from Colombia and the Quaternary Dry Corridor of the Cauca Valley.” Historical Biology 36, no. 2 (February 1, 2024): 241–52. https://doi.org/10.1080/08912963.2022.2155955.
Northern Andes	Colombia	This Study	This Study	TP-EH	Gomphotheriidae	Notiomastodon platensis	Tibito (Co)	TBT-12-02	Enamel	4°59'11.9”N; 73°58'52.4”W	4.9866	-73.9812	2565	-13	-7.8	11,740±110 (Grn 9375)	This Study	Mothé, Dimila, Carlos Jaramillo, Gheny Krigsfeld Shuster, Nychollas Oikawa, and Sebastian Escobar-Florez. “Ain’t No Mountain High Enough? New Records of Notiomastodon Platensis (Mammalia, Proboscidea) from Colombia and the Quaternary Dry Corridor of the Cauca Valley.” Historical Biology 36, no. 2 (February 1, 2024): 241–52. https://doi.org/10.1080/08912963.2022.2155955.
Northern Andes	Colombia	This Study	This Study	TP-EH	Gomphotheriidae	Notiomastodon platensis	Tibito (Co)	TBT-08	Enamel	4°59'11.9”N; 73°58'52.4”W	4.9866	-73.9812	2565	-12.04	-6.4	11,740±110 (Grn 9375)	This Study	Mothé, Dimila, Carlos Jaramillo, Gheny Krigsfeld Shuster, Nychollas Oikawa, and Sebastian Escobar-Florez. “Ain’t No Mountain High Enough? New Records of Notiomastodon Platensis (Mammalia, Proboscidea) from Colombia and the Quaternary Dry Corridor of the Cauca Valley.” Historical Biology 36, no. 2 (February 1, 2024): 241–52. https://doi.org/10.1080/08912963.2022.2155955.
Northern Andes	Colombia	This Study	This Study	TP-EH	Gomphotheriidae	Notiomastodon platensis	Tibito (Co)	TBT-11-01	Enamel	4°59'11.9”N; 73°58'52.4”W	4.9866	-73.9812	2565	-11.55	-9.51	11,740±110 (Grn 9375)	This Study	Mothé, Dimila, Carlos Jaramillo, Gheny Krigsfeld Shuster, Nychollas Oikawa, and Sebastian Escobar-Florez. “Ain’t No Mountain High Enough? New Records of Notiomastodon Platensis (Mammalia, Proboscidea) from Colombia and the Quaternary Dry Corridor of the Cauca Valley.” Historical Biology 36, no. 2 (February 1, 2024): 241–52. https://doi.org/10.1080/08912963.2022.2155955.
Northern Andes	Colombia	This Study	This Study	TP-EH	Gomphotheriidae	Notiomastodon platensis	Tibito (Co)	TBT-09-13	Enamel	4°59'11.9”N; 73°58'52.4”W	4.9866	-73.9812	2565	-10.8	-5.51	11,740±110 (Grn 9375)	This Study	Mothé, Dimila, Carlos Jaramillo, Gheny Krigsfeld Shuster, Nychollas Oikawa, and Sebastian Escobar-Florez. “Ain’t No Mountain High Enough? New Records of Notiomastodon Platensis (Mammalia, Proboscidea) from Colombia and the Quaternary Dry Corridor of the Cauca Valley.” Historical Biology 36, no. 2 (February 1, 2024): 241–52. https://doi.org/10.1080/08912963.2022.2155955.
Northern Andes	Colombia	This Study	This Study	TP-EH	Gomphotheriidae	Notiomastodon platensis	Tibito (Co)	TBT-10-01	Enamel	4°59'11.9”N; 73°58'52.4”W	4.9866	-73.9812	2565	-6.96	-5.31	11,740±110 (Grn 9375)	This Study	Mothé, Dimila, Carlos Jaramillo, Gheny Krigsfeld Shuster, Nychollas Oikawa, and Sebastian Escobar-Florez. “Ain’t No Mountain High Enough? New Records of Notiomastodon Platensis (Mammalia, Proboscidea) from Colombia and the Quaternary Dry Corridor of the Cauca Valley.” Historical Biology 36, no. 2 (February 1, 2024): 241–52. https://doi.org/10.1080/08912963.2022.2155955.
Northern Andes	Colombia	This Study	This Study	TP-EH	Gomphotheriidae	Notiomastodon platensis	Totumo - Tocaima (Co)	TOT-01	Enamel	4°25'13.72"N; 74°43'45.12"W	4.4202	-74.7291	2565	-11.3	-6.6	6060±60 (Col. 698 GrA-3008)	This Study	Personal Communications with Correal Urrego
Northern Andes	Colombia	This Study	This Study	LP	Gomphotheriidae	Notiomastodon platensis	Zanjón (Co)	3353-A / DA-ZJN-01-01	Enamel	SGC Museum Sample				-8.82	-10.62		This Study
Northern Andes	Ecuador	Doming et al., 2012	Sánchez et al. (2004)	LP	Gomphotheriidae	Cuvieronious hyodon	Alangasí (Ec)	V.1239	Enamel	0°18'10”N; 78°45'43”W	-0.3028	-78.7619	2778	-7.38	-8.16	Late Pleistocene 26,0-19,0	Domingo, Laura, José Luis Prado, and María Teresa Alberdi. “The Effect of Paleoecology and Paleobiogeography on Stable Isotopes of Quaternary Mammals from South America.” Quaternary Science Reviews 55 (November 8, 2012): 103–13. https://doi.org/10.1016/j.quascirev.2012.08.017.	Pérez-Crespo, Víctor A., José L. Prado, Maria T. Alberdi, Joaquín Arroyo-Cabrales, and Eileen Johnson. “Diet and Habitat for Six American Pleistocene Proboscidean Species Using Carbon and Oxygen Stable Isotopes.” Ameghiniana 53, no. 1 (February 2016): 39–51. https://doi.org/10.5710/AMGH.02.06.2015.2842.
Northern Andes	Ecuador	Sánchez et al., 2004		LP	Gomphotheriidae	C. hyodon (late Pl)	Alangasí (Ec)	V-1238	Enamel	0°18'10”N; 78°45'43”W	-0.3028	-78.7619	2778	-9.59	-8.09	26 to 19 ka BP	Sánchez, Begoña, José Luis Prado, and María Teresa Alberdi. 2004. “Feeding Ecology, Dispersal, and Extinction of South American Pleistocene Gomphotheres (Gomphotheriidae, Proboscidea).” Paleobiology 30 (1): 146–61.	Pérez-Crespo, Víctor A., José L. Prado, Maria T. Alberdi, Joaquín Arroyo-Cabrales, and Eileen Johnson. “Diet and Habitat for Six American Pleistocene Proboscidean Species Using Carbon and Oxygen Stable Isotopes.” Ameghiniana 53, no. 1 (February 2016): 39–51. https://doi.org/10.5710/AMGH.02.06.2015.2842.
Northern Andes	Ecuador	Sánchez et al., 2004		LP	Gomphotheriidae	C. hyodon (late Pl)	Alangasí (Ec)	V-3038	Enamel	0°18'10”N; 78°45'43”W	-0.3028	-78.7619	2778	-8.04	-7.18	26 to 19 ka BP	Sánchez, Begoña, José Luis Prado, and María Teresa Alberdi. 2004. “Feeding Ecology, Dispersal, and Extinction of South American Pleistocene Gomphotheres (Gomphotheriidae, Proboscidea).” Paleobiology 30 (1): 146–61.	Pérez-Crespo, Víctor A., José L. Prado, Maria T. Alberdi, Joaquín Arroyo-Cabrales, and Eileen Johnson. “Diet and Habitat for Six American Pleistocene Proboscidean Species Using Carbon and Oxygen Stable Isotopes.” Ameghiniana 53, no. 1 (February 2016): 39–51. https://doi.org/10.5710/AMGH.02.06.2015.2842.
Northern Andes	Ecuador	Doming et al., 2012	Prado et al. (2011)	TP-EH	Equus	Equus santaeelenae	La Carolina (Ec)	V.3037	Enamel	2°13′55″S; 80°53′57″W	-2.2319	-80.8991	0	1.5	1.63	12,0-8,0	Domingo, Laura, José Luis Prado, and María Teresa Alberdi. “The Effect of Paleoecology and Paleobiogeography on Stable Isotopes of Quaternary Mammals from South America.” Quaternary Science Reviews 55 (November 8, 2012): 103–13. https://doi.org/10.1016/j.quascirev.2012.08.017.	Lindsey, E. L., and K. L. Seymour. “Tar Pits" of the Western Neotropics: Paleoecology, Taphonomy, and Mammalian Biogeography.” Vol. Number 42. Natural History Museum of Los Angeles County, 2015.		18,400 ± 600: One date of18,400 ± 600 BP has been reported for LaCarolina, also on twigs supposedly “chewed” by Eremotherium (Churcher, 1966; Lindsey, E. L., and K. L. Seymour. “Tar Pits" of the Western Neotropics: Paleoecology, Taphonomy, and Mammalian Biogeography.” Vol. Number 42. Natural History Museum of Los Angeles County, 2015.	12-8kya Prado, José L., Begoña Sánchez, and María T. Alberdi. “Ancient Feeding Ecology Inferred from Stable Isotopic Evidence from Fossil Horses in South America over the Past 3 Ma.” BMC Ecology 11 (June 14, 2011): 15. https://doi.org/10.1186/1472-6785-11-15.
Northern Andes	Ecuador	Doming et al., 2012	MacFadden et al. (1999)	TP-EH	Equus	Equus santaeelenae	La Carolina (Ec)	V-3037	Enamel	2°13′55″S; 80°53′57″W	-2.2319	-80.8991	0	1.8	1.73	12,0-8,0	Domingo, Laura, José Luis Prado, and María Teresa Alberdi. “The Effect of Paleoecology and Paleobiogeography on Stable Isotopes of Quaternary Mammals from South America.” Quaternary Science Reviews 55 (November 8, 2012): 103–13. https://doi.org/10.1016/j.quascirev.2012.08.017.	Lindsey, E. L., and K. L. Seymour. “Tar Pits" of the Western Neotropics: Paleoecology, Taphonomy, and Mammalian Biogeography.” Vol. Number 42. Natural History Museum of Los Angeles County, 2015.		18,400 ± 600: One date of18,400 ± 600 BP has been reported for LaCarolina, also on twigs supposedly “chewed” by Eremotherium (Churcher, 1966; Lindsey, E. L., and K. L. Seymour. “Tar Pits" of the Western Neotropics: Paleoecology, Taphonomy, and Mammalian Biogeography.” Vol. Number 42. Natural History Museum of Los Angeles County, 2015.	12-8kya Prado, José L., Begoña Sánchez, and María T. Alberdi. “Ancient Feeding Ecology Inferred from Stable Isotopic Evidence from Fossil Horses in South America over the Past 3 Ma.” BMC Ecology 11 (June 14, 2011): 15. https://doi.org/10.1186/1472-6785-11-15.
Northern Andes	Ecuador	Doming et al., 2012	MacFadden et al. (1999)	TP-EH	Equus	Equus santaeelenae	La Carolina (Ec)	V-68	Enamel	2°13′55″S; 80°53′57″W	-2.2319	-80.8991	0	5.4	2.6	12,0-8,0	Domingo, Laura, José Luis Prado, and María Teresa Alberdi. “The Effect of Paleoecology and Paleobiogeography on Stable Isotopes of Quaternary Mammals from South America.” Quaternary Science Reviews 55 (November 8, 2012): 103–13. https://doi.org/10.1016/j.quascirev.2012.08.017.	Lindsey, E. L., and K. L. Seymour. “Tar Pits" of the Western Neotropics: Paleoecology, Taphonomy, and Mammalian Biogeography.” Vol. Number 42. Natural History Museum of Los Angeles County, 2015.		18,400 ± 600: One date of18,400 ± 600 BP has been reported for LaCarolina, also on twigs supposedly “chewed” by Eremotherium (Churcher, 1966; Lindsey, E. L., and K. L. Seymour. “Tar Pits" of the Western Neotropics: Paleoecology, Taphonomy, and Mammalian Biogeography.” Vol. Number 42. Natural History Museum of Los Angeles County, 2015.	12-8kya Prado, José L., Begoña Sánchez, and María T. Alberdi. “Ancient Feeding Ecology Inferred from Stable Isotopic Evidence from Fossil Horses in South America over the Past 3 Ma.” BMC Ecology 11 (June 14, 2011): 15. https://doi.org/10.1186/1472-6785-11-15.
Northern Andes	Ecuador	Doming et al., 2012	Sánchez et al. (2004)	TP-EH	Gomphotheriidae	Stegomastodon waringi	La Carolina (Ec)	V.1269	Enamel	2°13′55″S; 80°53′57″W	-2.2319	-80.8991	0	-5.97	-0.14	12 to 8 ka BP	Domingo, Laura, José Luis Prado, and María Teresa Alberdi. “The Effect of Paleoecology and Paleobiogeography on Stable Isotopes of Quaternary Mammals from South America.” Quaternary Science Reviews 55 (November 8, 2012): 103–13. https://doi.org/10.1016/j.quascirev.2012.08.017.	Lindsey, E. L., and K. L. Seymour. “Tar Pits" of the Western Neotropics: Paleoecology, Taphonomy, and Mammalian Biogeography.” Vol. Number 42. Natural History Museum of Los Angeles County, 2015.		18,400 ± 600: One date of18,400 ± 600 BP has been reported for LaCarolina, also on twigs supposedly “chewed” by Eremotherium (Churcher, 1966; Lindsey, E. L., and K. L. Seymour. “Tar Pits" of the Western Neotropics: Paleoecology, Taphonomy, and Mammalian Biogeography.” Vol. Number 42. Natural History Museum of Los Angeles County, 2015.
Northern Andes	Ecuador	Doming et al., 2012	Sánchez et al. (2004)	TP-EH	Gomphotheriidae	Stegomastodon waringi	La Carolina (Ec)	V.160	Enamel	2°13′55″S; 80°53′57″W	-2.2319	-80.8991	0	-0.78	-0.02	12 to 8 ka BP	Domingo, Laura, José Luis Prado, and María Teresa Alberdi. “The Effect of Paleoecology and Paleobiogeography on Stable Isotopes of Quaternary Mammals from South America.” Quaternary Science Reviews 55 (November 8, 2012): 103–13. https://doi.org/10.1016/j.quascirev.2012.08.017.	Lindsey, E. L., and K. L. Seymour. “Tar Pits" of the Western Neotropics: Paleoecology, Taphonomy, and Mammalian Biogeography.” Vol. Number 42. Natural History Museum of Los Angeles County, 2015.		18,400 ± 600: One date of18,400 ± 600 BP has been reported for LaCarolina, also on twigs supposedly “chewed” by Eremotherium (Churcher, 1966; Lindsey, E. L., and K. L. Seymour. “Tar Pits" of the Western Neotropics: Paleoecology, Taphonomy, and Mammalian Biogeography.” Vol. Number 42. Natural History Museum of Los Angeles County, 2015.
Northern Andes	Ecuador	Sánchez et al., 2004		LP	Gomphotheriidae	C. hyodon (late Pl)	Punín (Ec)	V-164	Enamel	1°45’55”S; 78°39’23”W	-1.7654	-78.6564	2778	-9.71	-7.67	20 to 12 ka BP	Sánchez, Begoña, José Luis Prado, and María Teresa Alberdi. 2004. “Feeding Ecology, Dispersal, and Extinction of South American Pleistocene Gomphotheres (Gomphotheriidae, Proboscidea).” Paleobiology 30 (1): 146–61.	Ferretti, Marco P. “Anatomy of Haplomastodon Chimborazi (Mammalia, Proboscidea) from the Late Pleistocene of Ecuador and Its Bearing on the Phylogeny and Systematics of South American Gomphotheres.” Geodiversitas 32, no. Dec 2010 (January 3, 2011): 663–721. https://doi.org/10.5252/g2010n4a3.
Northern Andes	Ecuador	Sánchez et al., 2004		LP	Gomphotheriidae	C. hyodon (late Pl)	Punín (Ec)	V-1254	Enamel	1°45’55”S; 78°39’23”W	-1.7654	-78.6564	2778	-5.66	-8.53	20 to 12 ka BP	Sánchez, Begoña, José Luis Prado, and María Teresa Alberdi. 2004. “Feeding Ecology, Dispersal, and Extinction of South American Pleistocene Gomphotheres (Gomphotheriidae, Proboscidea).” Paleobiology 30 (1): 146–61.	Ferretti, Marco P. “Anatomy of Haplomastodon Chimborazi (Mammalia, Proboscidea) from the Late Pleistocene of Ecuador and Its Bearing on the Phylogeny and Systematics of South American Gomphotheres.” Geodiversitas 32, no. Dec 2010 (January 3, 2011): 663–721. https://doi.org/10.5252/g2010n4a3.
Northern Andes	Ecuador	Doming et al., 2012	MacFadden et al. (1999)	LP	Equus	Equus santaeelenae	Salinas Oil Field (Ec)	F:AM 131869	Enamel	2°12'59"S; 80°57'52"W	-2.2164	-80.9644	0	-0.8	1.63	26,0-19,0	Domingo, Laura, José Luis Prado, and María Teresa Alberdi. “The Effect of Paleoecology and Paleobiogeography on Stable Isotopes of Quaternary Mammals from South America.” Quaternary Science Reviews 55 (November 8, 2012): 103–13. https://doi.org/10.1016/j.quascirev.2012.08.017.	Lindsey, E. L., and K. L. Seymour. “Tar Pits" of the Western Neotropics: Paleoecology, Taphonomy, and Mammalian Biogeography.” Vol. Number 42. Natural History Museum of Los Angeles County, 2015.
Northern Andes	Ecuador	Doming et al., 2012	MacFadden et al. (1999)	LP	Equus	Equus santaeelenae	Salinas Oil Field (Ec)	F:AM 131868	Enamel	2°12'59"S; 80°57'52"W	-2.2164	-80.9644	0	3	1.54	26,0-19,0	Domingo, Laura, José Luis Prado, and María Teresa Alberdi. “The Effect of Paleoecology and Paleobiogeography on Stable Isotopes of Quaternary Mammals from South America.” Quaternary Science Reviews 55 (November 8, 2012): 103–13. https://doi.org/10.1016/j.quascirev.2012.08.017.	Lindsey, E. L., and K. L. Seymour. “Tar Pits" of the Western Neotropics: Paleoecology, Taphonomy, and Mammalian Biogeography.” Vol. Number 42. Natural History Museum of Los Angeles County, 2015.
Northern Andes	Peru	Doming et al., 2012	Doming et al., 2012	LP	Gomphotheriidae	Cuvieronius hyodon	Ayusbamba (Pe)	MUSM-42	Enamel	13°55'33''S; 72°12'47''W	-13.9261	-72.213	3783	-3.14	-4.75	Late Pleistocene	Domingo, Laura, José Luis Prado, and María Teresa Alberdi. “The Effect of Paleoecology and Paleobiogeography on Stable Isotopes of Quaternary Mammals from South America.” Quaternary Science Reviews 55 (November 8, 2012): 103–13. https://doi.org/10.1016/j.quascirev.2012.08.017.	Pujos, François, and Rodolfo Salas. “A Systematic Reassessment and Paleogeographic Review of Fossil Xenarthra from Peru.” Bulletin de l’Institut Français d’études Andines, no. 33 (2) (August 1, 2004): 331–77. https://doi.org/10.4000/bifea.5746.
Northern Andes	Peru	Doming et al., 2012	Doming et al., 2012	LP	Gomphotheriidae	Cuvieronius hyodon	Ayusbamba (Pe)	MUSM-43	Enamel	13°55'33''S; 72°12'47''W	-13.9261	-72.213	3783	-1.84	-5.58	Late Pleistocene	Domingo, Laura, José Luis Prado, and María Teresa Alberdi. “The Effect of Paleoecology and Paleobiogeography on Stable Isotopes of Quaternary Mammals from South America.” Quaternary Science Reviews 55 (November 8, 2012): 103–13. https://doi.org/10.1016/j.quascirev.2012.08.017.	Pujos, François, and Rodolfo Salas. “A Systematic Reassessment and Paleogeographic Review of Fossil Xenarthra from Peru.” Bulletin de l’Institut Français d’études Andines, no. 33 (2) (August 1, 2004): 331–77. https://doi.org/10.4000/bifea.5746.
Northern Andes	Peru	Doming et al., 2012	Doming et al., 2012	LP	Gomphotheriidae	Cuvieronius hyodon	Ayusbamba (Pe)	MUSM-45	Enamel	13°55'33''S; 72°12'47''W	-13.9261	-72.213	3783	-1.11	-3.05	Late Pleistocene	Domingo, Laura, José Luis Prado, and María Teresa Alberdi. “The Effect of Paleoecology and Paleobiogeography on Stable Isotopes of Quaternary Mammals from South America.” Quaternary Science Reviews 55 (November 8, 2012): 103–13. https://doi.org/10.1016/j.quascirev.2012.08.017.	Pujos, François, and Rodolfo Salas. “A Systematic Reassessment and Paleogeographic Review of Fossil Xenarthra from Peru.” Bulletin de l’Institut Français d’études Andines, no. 33 (2) (August 1, 2004): 331–77. https://doi.org/10.4000/bifea.5746.
Northern Andes	Peru	Doming et al., 2012	Doming et al., 2012	LP	Gomphotheriidae	Stegomastodon waringi	Quipan (Pe)	MUSM-84	Enamel	11°28′1.2″S 76°37′26.4″W	-11.467	-76.624	2930	-9.21	-4.33	Late Pleistocene	Domingo, Laura, José Luis Prado, and María Teresa Alberdi. “The Effect of Paleoecology and Paleobiogeography on Stable Isotopes of Quaternary Mammals from South America.” Quaternary Science Reviews 55 (November 8, 2012): 103–13. https://doi.org/10.1016/j.quascirev.2012.08.017.	Alberdi, María Teresa, and José Luis Prado. “The Pleistocene Gomphotheriidae (Proboscidea) from Peru.” Neues Jahrbuch Für Geologie Und Palaontologie. Abhandlungen 231, no. 3 (April 2, 2004): 423–52. https://doi.org/10.1127/njgpa/231/2004/423.
Northern Andes	Peru	Doming et al., 2012	MacFadden et al. (1999)	LP	Equus	Equus santaeelenae	Talara Tar Pit (Pe)	ROM.3471C	Enamel	4°33'S; 81°7′W	-4.55	-81.1166	85	2.1	-3.8	26,0-19,0	Domingo, Laura, José Luis Prado, and María Teresa Alberdi. “The Effect of Paleoecology and Paleobiogeography on Stable Isotopes of Quaternary Mammals from South America.” Quaternary Science Reviews 55 (November 8, 2012): 103–13. https://doi.org/10.1016/j.quascirev.2012.08.017.	Lindsey, E. L., and K. L. Seymour. “Tar Pits" of the Western Neotropics: Paleoecology, Taphonomy, and Mammalian Biogeography.” Vol. Number 42. Natural History Museum of Los Angeles County, 2015.
Pampas/BIR	Brazil (BIR)	Dantas et al., 2017	Dantas et al., 2013	TP-EH	Gomphotheriidae	Notiomastodon platensis	Barcelona/RN (Br)	UGAMS 09440	Enamel	5°57'43"S; 35°44'3"W	-5.962	-35.7341	90	1.04	-0.25	11,324 &11,807 cal yr BP; 10,050 ± 35 years BP	Dantas, Mário André Trindade, Alexander Cherkinsky, Hervé Bocherens, Morgana Drefahl, Camila Bernardes, and Lucas de Melo França. “Isotopic Paleoecology of the Pleistocene Megamammals from the Brazilian Intertropical Region: Feeding Ecology (δ13C), Niche Breadth and Overlap.” Quaternary Science Reviews 170 (August 15, 2017): 152–63. https://doi.org/10.1016/j.quascirev.2017.06.030.	Dantas, Mário André Trindade, Alexander Cherkinsky, Hervé Bocherens, Morgana Drefahl, Camila Bernardes, and Lucas de Melo França. “Isotopic Paleoecology of the Pleistocene Megamammals from the Brazilian Intertropical Region: Feeding Ecology (δ13C), Niche Breadth and Overlap.” Quaternary Science Reviews 170 (August 15, 2017): 152–63. https://doi.org/10.1016/j.quascirev.2017.06.030.
Pampas/BIR	Brazil (BIR)	Dantas et al., 2017	Dantas et al., 2013	LP	Gomphotheriidae	Notiomastodon platensis	Canhoba/SE (Br)	UGAMS 09439	Enamel	10°5'18"S; 37°15'38"W	-10.0885	-37.2607	175	-1.54	-1.67	21,180 – 21,550	Dantas, Mário André Trindade, Alexander Cherkinsky, Hervé Bocherens, Morgana Drefahl, Camila Bernardes, and Lucas de Melo França. “Isotopic Paleoecology of the Pleistocene Megamammals from the Brazilian Intertropical Region: Feeding Ecology (δ13C), Niche Breadth and Overlap.” Quaternary Science Reviews 170 (August 15, 2017): 152–63. https://doi.org/10.1016/j.quascirev.2017.06.030.	Dantas, Mário André Trindade, Alexander Cherkinsky, Hervé Bocherens, Morgana Drefahl, Camila Bernardes, and Lucas de Melo França. “Isotopic Paleoecology of the Pleistocene Megamammals from the Brazilian Intertropical Region: Feeding Ecology (δ13C), Niche Breadth and Overlap.” Quaternary Science Reviews 170 (August 15, 2017): 152–63. https://doi.org/10.1016/j.quascirev.2017.06.030.
Pampas/BIR	Brazil (BIR)	Dantas et al., 2017	Dantas et al., 2013	LP	Gomphotheriidae	Notiomastodon platensis	Coronel João Sá/BA (Br)	UGAMS 09438	Enamel	10°17'27"S; 38°14'53"W	-10.2908	-38.2483	340	-0.85	-1.15	16,800 – 17,380; 18,321 & 18,636 cal yr BP; 15,210 ± 40 years BP	Dantas, Mário André Trindade, Alexander Cherkinsky, Hervé Bocherens, Morgana Drefahl, Camila Bernardes, and Lucas de Melo França. “Isotopic Paleoecology of the Pleistocene Megamammals from the Brazilian Intertropical Region: Feeding Ecology (δ13C), Niche Breadth and Overlap.” Quaternary Science Reviews 170 (August 15, 2017): 152–63. https://doi.org/10.1016/j.quascirev.2017.06.030.	Dantas, Mário André Trindade, Alexander Cherkinsky, Hervé Bocherens, Morgana Drefahl, Camila Bernardes, and Lucas de Melo França. “Isotopic Paleoecology of the Pleistocene Megamammals from the Brazilian Intertropical Region: Feeding Ecology (δ13C), Niche Breadth and Overlap.” Quaternary Science Reviews 170 (August 15, 2017): 152–63. https://doi.org/10.1016/j.quascirev.2017.06.030.
Pampas/BIR	Brazil (BIR)	Dantas et al., 2017	Dantas et al., 2013	LP	Gomphotheriidae	Notiomastodon platensis	Coronel João Sá/BA (Br)	UGAMS 09441	Enamel	10°17'27"S; 38°14'53"W	-10.2908	-38.2483	340	-0.03	-0.3	18,321 – 18,636; 18,321 & 18,636 cal yr BP; 15,210 ± 40 years BP	Dantas, Mário André Trindade, Alexander Cherkinsky, Hervé Bocherens, Morgana Drefahl, Camila Bernardes, and Lucas de Melo França. “Isotopic Paleoecology of the Pleistocene Megamammals from the Brazilian Intertropical Region: Feeding Ecology (δ13C), Niche Breadth and Overlap.” Quaternary Science Reviews 170 (August 15, 2017): 152–63. https://doi.org/10.1016/j.quascirev.2017.06.030.	Dantas, Mário André Trindade, Alexander Cherkinsky, Hervé Bocherens, Morgana Drefahl, Camila Bernardes, and Lucas de Melo França. “Isotopic Paleoecology of the Pleistocene Megamammals from the Brazilian Intertropical Region: Feeding Ecology (δ13C), Niche Breadth and Overlap.” Quaternary Science Reviews 170 (August 15, 2017): 152–63. https://doi.org/10.1016/j.quascirev.2017.06.030.
Pampas/BIR	Brazil (BIR)	Doming et al., 2012	MacFadden et al. (1999)	LP	Equus	Equus neogeus	Ourolandia Toc. dos Ossos (Br)	uncatalogued	Enamel	12°1'S; 41°52'W	-12.0299	-41.8722	200	1.1	-1.37	26,0-19,0	Domingo, Laura, José Luis Prado, and María Teresa Alberdi. “The Effect of Paleoecology and Paleobiogeography on Stable Isotopes of Quaternary Mammals from South America.” Quaternary Science Reviews 55 (November 8, 2012): 103–13. https://doi.org/10.1016/j.quascirev.2012.08.017.	Macfadden, Bruce J., Thure E. Cerling, John M. Harris, and José Prado. “Ancient Latitudinal Gradients of C3/C4 Grasses Interpreted from Stable Isotopes of New World Pleistocene Horse (Equus) Teeth.” Global Ecology and Biogeography 8, no. 2 (March 1, 1999): 137–49. https://doi.org/10.1046/j.1466-822X.1999.00127.x.
Pampas/BIR	Brazil (BIR)	Doming et al., 2012	MacFadden et al. (1999)	LP	Equus	Equus neogeus	Ourolandia Toc. dos Ossos (Br)	uncatalogued	Enamel	12°1'S; 41°52'W	-12.0299	-41.8722	200	1.7	-0.31	26,0-19,0	Domingo, Laura, José Luis Prado, and María Teresa Alberdi. “The Effect of Paleoecology and Paleobiogeography on Stable Isotopes of Quaternary Mammals from South America.” Quaternary Science Reviews 55 (November 8, 2012): 103–13. https://doi.org/10.1016/j.quascirev.2012.08.017.	Macfadden, Bruce J., Thure E. Cerling, John M. Harris, and José Prado. “Ancient Latitudinal Gradients of C3/C4 Grasses Interpreted from Stable Isotopes of New World Pleistocene Horse (Equus) Teeth.” Global Ecology and Biogeography 8, no. 2 (March 1, 1999): 137–49. https://doi.org/10.1046/j.1466-822X.1999.00127.x.
Pampas/BIR	Brazil (BIR)	Dantas et al., 2023	Dantas et al., 2023	LP	Gomphotheriidae	Notiomastodon platensis	Ourolândia BIR (Br)	UGAMS 42488	Enamel?	6°40′24.56′′S; 35°22′34.89′′W	-6.6734	-35.3763	150	0	-3.51	35,209 – 34,628	Dantas, Mário André Trindade, Verônica Santos Gomes, Alexander Cherkinsky, and Hermínio Ismael de Araújo-Junior. “Annual Isotopic Diet (δ13C) ofEremotherium Laurillardi(Lund, 1842) and Climate Variation (δ18O) through the Late Pleistocene in the Brazilian Intertropical Region.” Quaternary Research 115 (September 2023): 194–201. https://doi.org/10.1017/qua.2023.17.	Dantas, Mário André Trindade, Verônica Santos Gomes, Alexander Cherkinsky, and Hermínio Ismael de Araújo-Junior. “Annual Isotopic Diet (δ13C) ofEremotherium Laurillardi(Lund, 1842) and Climate Variation (δ18O) through the Late Pleistocene in the Brazilian Intertropical Region.” Quaternary Research 115 (September 2023): 194–201. https://doi.org/10.1017/qua.2023.17.
Pampas/BIR	Brazil (BIR)	Dantas et al., 2017	Franca et al., 2014	TP-EH	Gomphotheriidae	Notiomastodon platensis	Poço Redondo/SE (Br)	UGAMS 13535	Enamel	9°55′44′′S; 37°52′0.9′′W	-9.9289	-37.8669	305	-0.4	3.6	16,022 – 16,840; 6,644 & 17,147 cal yr BP; 13,950 ± 40 years BP	Dantas, Mário André Trindade, Alexander Cherkinsky, Hervé Bocherens, Morgana Drefahl, Camila Bernardes, and Lucas de Melo França. “Isotopic Paleoecology of the Pleistocene Megamammals from the Brazilian Intertropical Region: Feeding Ecology (δ13C), Niche Breadth and Overlap.” Quaternary Science Reviews 170 (August 15, 2017): 152–63. https://doi.org/10.1016/j.quascirev.2017.06.030.	Dantas, Mário André Trindade, Alexander Cherkinsky, Hervé Bocherens, Morgana Drefahl, Camila Bernardes, and Lucas de Melo França. “Isotopic Paleoecology of the Pleistocene Megamammals from the Brazilian Intertropical Region: Feeding Ecology (δ13C), Niche Breadth and Overlap.” Quaternary Science Reviews 170 (August 15, 2017): 152–63. https://doi.org/10.1016/j.quascirev.2017.06.030.
Pampas/BIR	Brazil (BIR)	Dantas et al., 2017	Franca et al., 2014	TP-EH	Gomphotheriidae	Notiomastodon platensis	Poço Redondo/SE (Br)	UGAMS 13537	Enamel	9°55′44′′S; 37°52′0.9′′W	-9.9289	-37.8669	305	-1.1	2.2	12,125 – 12,533	Dantas, Mário André Trindade, Alexander Cherkinsky, Hervé Bocherens, Morgana Drefahl, Camila Bernardes, and Lucas de Melo França. “Isotopic Paleoecology of the Pleistocene Megamammals from the Brazilian Intertropical Region: Feeding Ecology (δ13C), Niche Breadth and Overlap.” Quaternary Science Reviews 170 (August 15, 2017): 152–63. https://doi.org/10.1016/j.quascirev.2017.06.030.	Dantas, Mário André Trindade, Alexander Cherkinsky, Hervé Bocherens, Morgana Drefahl, Camila Bernardes, and Lucas de Melo França. “Isotopic Paleoecology of the Pleistocene Megamammals from the Brazilian Intertropical Region: Feeding Ecology (δ13C), Niche Breadth and Overlap.” Quaternary Science Reviews 170 (August 15, 2017): 152–63. https://doi.org/10.1016/j.quascirev.2017.06.030.
Pampas/BIR	Brazil (BIR)	Dantas et al., 2017	Franca et al., 2014	LP	Gomphotheriidae	Notiomastodon platensis	Poço Redondo/SE (Br)	UGAMS 13536	Enamel	9°55′44′′S; 37°52′0.9′′W	-9.9289	-37.8669	305	-0.2	2.4	19,400 – 19,594	Dantas, Mário André Trindade, Alexander Cherkinsky, Hervé Bocherens, Morgana Drefahl, Camila Bernardes, and Lucas de Melo França. “Isotopic Paleoecology of the Pleistocene Megamammals from the Brazilian Intertropical Region: Feeding Ecology (δ13C), Niche Breadth and Overlap.” Quaternary Science Reviews 170 (August 15, 2017): 152–63. https://doi.org/10.1016/j.quascirev.2017.06.030.	Dantas, Mário André Trindade, Alexander Cherkinsky, Hervé Bocherens, Morgana Drefahl, Camila Bernardes, and Lucas de Melo França. “Isotopic Paleoecology of the Pleistocene Megamammals from the Brazilian Intertropical Region: Feeding Ecology (δ13C), Niche Breadth and Overlap.” Quaternary Science Reviews 170 (August 15, 2017): 152–63. https://doi.org/10.1016/j.quascirev.2017.06.030.
Pampas/BIR	Brazil (BIR)	Dantas et al., 2017	Dantas et al., 2013	LP	Gomphotheriidae	Notiomastodon platensis	Poço Redondo/SE (Br)	UGAMS 09437	Enamel	9°55′44′′S; 37°52′0.9′′W	-9.9289	-37.8669	305	0.89	0.58	16,644 – 17,147	Dantas, Mário André Trindade, Alexander Cherkinsky, Hervé Bocherens, Morgana Drefahl, Camila Bernardes, and Lucas de Melo França. “Isotopic Paleoecology of the Pleistocene Megamammals from the Brazilian Intertropical Region: Feeding Ecology (δ13C), Niche Breadth and Overlap.” Quaternary Science Reviews 170 (August 15, 2017): 152–63. https://doi.org/10.1016/j.quascirev.2017.06.030.	Dantas, Mário André Trindade, Alexander Cherkinsky, Hervé Bocherens, Morgana Drefahl, Camila Bernardes, and Lucas de Melo França. “Isotopic Paleoecology of the Pleistocene Megamammals from the Brazilian Intertropical Region: Feeding Ecology (δ13C), Niche Breadth and Overlap.” Quaternary Science Reviews 170 (August 15, 2017): 152–63. https://doi.org/10.1016/j.quascirev.2017.06.030.
Pampas/BIR	Brazil (BIR)	Dantas et al., 2017	Franca et al., 2014	LP	Gomphotheriidae	Notiomastodon platensis	Poço Redondo/SE (Br)	UGAMS 13538	Enamel	9°55′44′′S; 37°52′0.9′′W	-9.9289	-37.8669	305	1.3	2.5	16,718 – 17,048	Dantas, Mário André Trindade, Alexander Cherkinsky, Hervé Bocherens, Morgana Drefahl, Camila Bernardes, and Lucas de Melo França. “Isotopic Paleoecology of the Pleistocene Megamammals from the Brazilian Intertropical Region: Feeding Ecology (δ13C), Niche Breadth and Overlap.” Quaternary Science Reviews 170 (August 15, 2017): 152–63. https://doi.org/10.1016/j.quascirev.2017.06.030.	Dantas, Mário André Trindade, Alexander Cherkinsky, Hervé Bocherens, Morgana Drefahl, Camila Bernardes, and Lucas de Melo França. “Isotopic Paleoecology of the Pleistocene Megamammals from the Brazilian Intertropical Region: Feeding Ecology (δ13C), Niche Breadth and Overlap.” Quaternary Science Reviews 170 (August 15, 2017): 152–63. https://doi.org/10.1016/j.quascirev.2017.06.030.
Pampas/BIR	Brazil (BIR)	Sánchez et al., 2004		LP	Gomphotheriidae	S. waringi (late Pl)	Toca dos Ossos (Br)		Enamel	12°1'S; 41°52'W	-12.0299	-41.8722	200	-8.2	-0.11	Late Pleistocene	Sánchez, Begoña, José Luis Prado, and María Teresa Alberdi. 2004. “Feeding Ecology, Dispersal, and Extinction of South American Pleistocene Gomphotheres (Gomphotheriidae, Proboscidea).” Paleobiology 30 (1): 146–61.	Macfadden, Bruce J., Thure E. Cerling, John M. Harris, and José Prado. “Ancient Latitudinal Gradients of C3/C4 Grasses Interpreted from Stable Isotopes of New World Pleistocene Horse (Equus) Teeth.” Global Ecology and Biogeography 8, no. 2 (March 1, 1999): 137–49. https://doi.org/10.1046/j.1466-822X.1999.00127.x.
Pampas/BIR	Brazil (BIR)	Sánchez et al., 2004		LP	Gomphotheriidae	S. waringi (late Pl)	Toca dos Ossos (Br)		Enamel	12°1'S; 41°52'W	-12.0299	-41.8722	200	-5	-1.91	Late Pleistocene	Sánchez, Begoña, José Luis Prado, and María Teresa Alberdi. 2004. “Feeding Ecology, Dispersal, and Extinction of South American Pleistocene Gomphotheres (Gomphotheriidae, Proboscidea).” Paleobiology 30 (1): 146–61.	Macfadden, Bruce J., Thure E. Cerling, John M. Harris, and José Prado. “Ancient Latitudinal Gradients of C3/C4 Grasses Interpreted from Stable Isotopes of New World Pleistocene Horse (Equus) Teeth.” Global Ecology and Biogeography 8, no. 2 (March 1, 1999): 137–49. https://doi.org/10.1046/j.1466-822X.1999.00127.x.
Pampas/BIR	Brazil (BIR)	Faria et al., 2021	Faria et al., 2021	TP-EH	Gomphotheriidae	Notiomastodon platensis	Lajedāo do Patrício (Br)	Notio-01	Enamel	11°16′52,4′′S; 41°35′79′′W	-11.2812	-41.6052	750	-5.67	-3.47		Faria, Fábio Henrique Cotes, Ismar de Souza Carvalho, and Hermínio Ismael de Araújo-Júnior. “Paleoenvironmental and Paleoecological Inferences of the Quaternary Megafauna of Lajedão Do Patrício, Bahia, Brazil.” Journal of South American Earth Sciences 110, no. 103378 (October 1, 2021): 103378. https://doi.org/10.1016/j.jsames.2021.103378.
Pampas/BIR	Brazil (BIR)	Faria et al., 2021	Faria et al., 2021	TP-EH	Gomphotheriidae	Notiomastodon platensis	Lajedāo do Patrício (Br)	Notio-02	Enamel	11°16′52,4′′S; 41°35′79′′W	-11.2812	-41.6052	750	-6.95	-4.35		Faria, Fábio Henrique Cotes, Ismar de Souza Carvalho, and Hermínio Ismael de Araújo-Júnior. “Paleoenvironmental and Paleoecological Inferences of the Quaternary Megafauna of Lajedão Do Patrício, Bahia, Brazil.” Journal of South American Earth Sciences 110, no. 103378 (October 1, 2021): 103378. https://doi.org/10.1016/j.jsames.2021.103378.
Pampas/BIR	Argentina (Pampas)	Doming et al., 2012	Doming et al., 2012	LP	Equus	Equus neogeus	Arenero Sposito (Ar)	esmalte diente	Enamel	33°40′55.21′′S; 59°39′54.49′′W	-33.682	-59.6651	3	-10.6	-2.31	41,0-37,0	Domingo, Laura, José Luis Prado, and María Teresa Alberdi. “The Effect of Paleoecology and Paleobiogeography on Stable Isotopes of Quaternary Mammals from South America.” Quaternary Science Reviews 55 (November 8, 2012): 103–13. https://doi.org/10.1016/j.quascirev.2012.08.017.	Dantas, M.A.T., et al., A review of the time scale and potential geographic distribution of Notiomastodon platensis (Ameghino, 1888) in the late Pleistocene of South America, Quaternary International (2013), http://dx.doi.org/10.1016/ j.quaint.2013.06.031
Pampas/BIR	Argentina (Pampas)	Doming et al., 2012	Doming et al., 2012	LP	Gomphotheriidae	Stegomastodon platensis	Arenero Sposito (Ar)	M1 (blanco)	Enamel	33°40′55.21′′S; 59°39′54.49′′W	-33.682	-59.6651	3	-9.39	-3.62	41,0-37,0	Domingo, Laura, José Luis Prado, and María Teresa Alberdi. “The Effect of Paleoecology and Paleobiogeography on Stable Isotopes of Quaternary Mammals from South America.” Quaternary Science Reviews 55 (November 8, 2012): 103–13. https://doi.org/10.1016/j.quascirev.2012.08.017.	Dantas, M.A.T., et al., A review of the time scale and potential geographic distribution of Notiomastodon platensis (Ameghino, 1888) in the late Pleistocene of South America, Quaternary International (2013), http://dx.doi.org/10.1016/ j.quaint.2013.06.031
Pampas/BIR	Argentina (Pampas)	Doming et al., 2012	Doming et al., 2012	LP	Gomphotheriidae	Stegomastodon platensis	Arenero Sposito (Ar)	M2 (negro)	Enamel	33°40′55.21′′S; 59°39′54.49′′W	-33.682	-59.6651	3	-7.03	1.11	41,0-37,0	Domingo, Laura, José Luis Prado, and María Teresa Alberdi. “The Effect of Paleoecology and Paleobiogeography on Stable Isotopes of Quaternary Mammals from South America.” Quaternary Science Reviews 55 (November 8, 2012): 103–13. https://doi.org/10.1016/j.quascirev.2012.08.017.	Dantas, M.A.T., et al., A review of the time scale and potential geographic distribution of Notiomastodon platensis (Ameghino, 1888) in the late Pleistocene of South America, Quaternary International (2013), http://dx.doi.org/10.1016/ j.quaint.2013.06.031
Pampas/BIR	Argentina (Pampas)	Doming et al., 2012	Doming et al., 2012	TP-EH	Equus	Equus neogeus	Arroyo Chasicó (Ar)	FCS.94.1 200 4	Enamel	38°20′18′′S; 62°38′40′′W	-38.338	-62.6447	43	-5.75	-1.54	28,0-10,0; 10,710 ± 50 yrs BP	Domingo, Laura, José Luis Prado, and María Teresa Alberdi. “The Effect of Paleoecology and Paleobiogeography on Stable Isotopes of Quaternary Mammals from South America.” Quaternary Science Reviews 55 (November 8, 2012): 103–13. https://doi.org/10.1016/j.quascirev.2012.08.017.	Prado, José L., Cayetana Martinez-Maza, and María T. Alberdi. “Megafauna Extinction in South America: A New Chronology for the Argentine Pampas.” Palaeogeography, Palaeoclimatology, Palaeoecology 425 (May 1, 2015): 41–49. https://doi.org/10.1016/j.palaeo.2015.02.026.
Pampas/BIR	Argentina (Pampas)	Doming et al., 2012	Doming et al., 2012	TP-EH	Equus	Equus neogeus	Arroyo Chasicó (Ar)	FCS.94.1.1. 2	Enamel	38°20′18′′S; 62°38′40′′W	-38.338	-62.6447	43	-4.78	-2.62	28,0-10,0	Domingo, Laura, José Luis Prado, and María Teresa Alberdi. “The Effect of Paleoecology and Paleobiogeography on Stable Isotopes of Quaternary Mammals from South America.” Quaternary Science Reviews 55 (November 8, 2012): 103–13. https://doi.org/10.1016/j.quascirev.2012.08.017.	Prado, José L., Cayetana Martinez-Maza, and María T. Alberdi. “Megafauna Extinction in South America: A New Chronology for the Argentine Pampas.” Palaeogeography, Palaeoclimatology, Palaeoecology 425 (May 1, 2015): 41–49. https://doi.org/10.1016/j.palaeo.2015.02.026.
Pampas/BIR	Argentina (Pampas)	Doming et al., 2012	Doming et al., 2012	LP	Gomphotheriidae	Stegomastodon platensis	Arroyo El Gualichu (Ar)	Arroyo El Gualichu	Enamel	36°8′2′′S; 58°35′59′′W	-36.134	-58.5998	42	-8.72	-2.1	Late Pleistocene	Domingo, Laura, José Luis Prado, and María Teresa Alberdi. “The Effect of Paleoecology and Paleobiogeography on Stable Isotopes of Quaternary Mammals from South America.” Quaternary Science Reviews 55 (November 8, 2012): 103–13. https://doi.org/10.1016/j.quascirev.2012.08.017.
Pampas/BIR	Argentina (Pampas)	Doming et al., 2012	Doming et al., 2012	LP	Equus	Hippidion principale	Arroyo Las Flores (Ar)	Arroyo Las Flores	Enamel?				40	-10	0.87	Late Pleistocene	Domingo, Laura, José Luis Prado, and María Teresa Alberdi. “The Effect of Paleoecology and Paleobiogeography on Stable Isotopes of Quaternary Mammals from South America.” Quaternary Science Reviews 55 (November 8, 2012): 103–13. https://doi.org/10.1016/j.quascirev.2012.08.017.
Pampas/BIR	Argentina (Pampas)	Doming et al., 2012	Prado et al. (2011)	LP	Equus	Hippidion principale	Arroyo Tapalqué (Ar)	MACN 1735	Tooth (E+D)	36°36′37′′S; 60°5′30′′W	-36.6104	-60.0917	50	-9.8	-1.67	28,0-10,0	Domingo, Laura, José Luis Prado, and María Teresa Alberdi. “The Effect of Paleoecology and Paleobiogeography on Stable Isotopes of Quaternary Mammals from South America.” Quaternary Science Reviews 55 (November 8, 2012): 103–13. https://doi.org/10.1016/j.quascirev.2012.08.017.	Prado, José L., Cayetana Martinez-Maza, and María T. Alberdi. “Megafauna Extinction in South America: A New Chronology for the Argentine Pampas.” Palaeogeography, Palaeoclimatology, Palaeoecology 425 (May 1, 2015): 41–49. https://doi.org/10.1016/j.palaeo.2015.02.026.
Pampas/BIR	Argentina (Pampas)	Doming et al., 2012	Prado et al. (2011)	LP	Equus	Hippidion principale	Arroyo Tapalqué (Ar)	MACN 1734	Tooth (E+D)	36°36′37′′S; 60°5′30′′W	-36.6104	-60.0917	50	-9.4	0.57	28,0-10,0	Domingo, Laura, José Luis Prado, and María Teresa Alberdi. “The Effect of Paleoecology and Paleobiogeography on Stable Isotopes of Quaternary Mammals from South America.” Quaternary Science Reviews 55 (November 8, 2012): 103–13. https://doi.org/10.1016/j.quascirev.2012.08.017.	Prado, José L., Cayetana Martinez-Maza, and María T. Alberdi. “Megafauna Extinction in South America: A New Chronology for the Argentine Pampas.” Palaeogeography, Palaeoclimatology, Palaeoecology 425 (May 1, 2015): 41–49. https://doi.org/10.1016/j.palaeo.2015.02.026.
Pampas/BIR	Argentina (Pampas)	Doming et al., 2012	Prado et al. (2011)	LP	Equus	Equus neogeus	Arroyo Tapalqué (Ar)	MACN 6116	Tooth (E+D)	36°36′37′′S; 60°5′30′′W	-36.6104	-60.0917	50	-8.5	-1.08	28,0-10,0	Domingo, Laura, José Luis Prado, and María Teresa Alberdi. “The Effect of Paleoecology and Paleobiogeography on Stable Isotopes of Quaternary Mammals from South America.” Quaternary Science Reviews 55 (November 8, 2012): 103–13. https://doi.org/10.1016/j.quascirev.2012.08.017.	Prado, José L., Cayetana Martinez-Maza, and María T. Alberdi. “Megafauna Extinction in South America: A New Chronology for the Argentine Pampas.” Palaeogeography, Palaeoclimatology, Palaeoecology 425 (May 1, 2015): 41–49. https://doi.org/10.1016/j.palaeo.2015.02.026.
Pampas/BIR	Argentina (Pampas)	Doming et al., 2012	Doming et al., 2012	LP	Equus	Equus (Amerhippus) neogeus	Calera Avellaneda (Ar)	Calera Avellaneda	Enamel	36°59′1.1′′S; 60°14′24′′W	-36.9836	-60.2402	205	-9.35	-0.89	Pleistocene?	Domingo, Laura, José Luis Prado, and María Teresa Alberdi. “The Effect of Paleoecology and Paleobiogeography on Stable Isotopes of Quaternary Mammals from South America.” Quaternary Science Reviews 55 (November 8, 2012): 103–13. https://doi.org/10.1016/j.quascirev.2012.08.017.
Pampas/BIR	Argentina (Pampas)	Doming et al., 2012	Sánchez et al. (2004)	LP	Gomphotheriidae	Stegomastodon platensis	Cant. Hdez. Orazi (Ar)	90-VIII.1.1	Enamel				10	-7.38	-1.12	Late Pelistocene	Domingo, Laura, José Luis Prado, and María Teresa Alberdi. “The Effect of Paleoecology and Paleobiogeography on Stable Isotopes of Quaternary Mammals from South America.” Quaternary Science Reviews 55 (November 8, 2012): 103–13. https://doi.org/10.1016/j.quascirev.2012.08.017.
Pampas/BIR	Argentina (Pampas)	Doming et al., 2012	Sánchez et al. (2004)	LP	Gomphotheriidae	Stegomastodon platensis	Cant. Hdez. Orazi (Ar)	90-VIII.1.1	Enamel				10	-7.3	-0.48	Late Pelistocene	Domingo, Laura, José Luis Prado, and María Teresa Alberdi. “The Effect of Paleoecology and Paleobiogeography on Stable Isotopes of Quaternary Mammals from South America.” Quaternary Science Reviews 55 (November 8, 2012): 103–13. https://doi.org/10.1016/j.quascirev.2012.08.017.
Pampas/BIR	Argentina (Pampas)	Doming et al., 2012	Sánchez et al. (2004)	LP	Gomphotheriidae	Stegomastodon platensis	Cant. Sr. Landa (Ar)	87-VII.35.1	Enamel				10	-8.05	-0.54	Late Pelistocene	Domingo, Laura, José Luis Prado, and María Teresa Alberdi. “The Effect of Paleoecology and Paleobiogeography on Stable Isotopes of Quaternary Mammals from South America.” Quaternary Science Reviews 55 (November 8, 2012): 103–13. https://doi.org/10.1016/j.quascirev.2012.08.017.
Pampas/BIR	Argentina (Pampas)	Doming et al., 2012	Sánchez et al. (2004)	LP	Gomphotheriidae	Stegomastodon platensis	Cant. Sr. Landa (Ar)	87-VII.35.1	Enamel				10	-8	-0.19	Late Pelistocene	Domingo, Laura, José Luis Prado, and María Teresa Alberdi. “The Effect of Paleoecology and Paleobiogeography on Stable Isotopes of Quaternary Mammals from South America.” Quaternary Science Reviews 55 (November 8, 2012): 103–13. https://doi.org/10.1016/j.quascirev.2012.08.017.
Pampas/BIR	Argentina (Pampas)	Doming et al., 2012	Doming et al., 2012	TP-EH	Equus	Equus neogeus	Cascada de Paleolama (Ar)	MMH.98.09.97	Enamel				30	-6.09	0.32	14	Domingo, Laura, José Luis Prado, and María Teresa Alberdi. “The Effect of Paleoecology and Paleobiogeography on Stable Isotopes of Quaternary Mammals from South America.” Quaternary Science Reviews 55 (November 8, 2012): 103–13. https://doi.org/10.1016/j.quascirev.2012.08.017.
Pampas/BIR	Argentina	Doming et al., 2012	MacFadden et al. (1999)	LP	Equus	Equus neogeus	Esperanza, Santa Fé (Ar)	MLP.52.IX.29-91	Enamel	31°26′56′′S; 60°55′49′′W	-31.4489	-60.9304	10	-0.8	-0.11	.5 myr to 10 kyr	Domingo, Laura, José Luis Prado, and María Teresa Alberdi. “The Effect of Paleoecology and Paleobiogeography on Stable Isotopes of Quaternary Mammals from South America.” Quaternary Science Reviews 55 (November 8, 2012): 103–13. https://doi.org/10.1016/j.quascirev.2012.08.017.
Pampas/BIR	Argentina	Doming et al., 2012	Doming et al., 2012	LP	Gomphotheriidae	Stegomastodon platensis	Granville (P4-Beto) (Ar)	V-377 MUESTRA 10	Enamel	34°41′36′′S; 58°37′5′′W	-34.6935	-58.6182	702	-1.78	-0.6	Late Pelistocene	Domingo, Laura, José Luis Prado, and María Teresa Alberdi. “The Effect of Paleoecology and Paleobiogeography on Stable Isotopes of Quaternary Mammals from South America.” Quaternary Science Reviews 55 (November 8, 2012): 103–13. https://doi.org/10.1016/j.quascirev.2012.08.017.
Pampas/BIR	Argentina	Doming et al., 2012	Doming et al., 2012	LP	Gomphotheriidae	Stegomastodon platensis	Granville (P4-Beto) (Ar)	V-378 MUESTRA 11	Enamel	34°41′36′′S; 58°37′5′′W	-34.6935	-58.6182	702	-1.05	-1.95	Late Pelistocene	Domingo, Laura, José Luis Prado, and María Teresa Alberdi. “The Effect of Paleoecology and Paleobiogeography on Stable Isotopes of Quaternary Mammals from South America.” Quaternary Science Reviews 55 (November 8, 2012): 103–13. https://doi.org/10.1016/j.quascirev.2012.08.017.
Pampas/BIR	Argentina	Doming et al., 2012	Doming et al., 2012	LP	Gomphotheriidae	Stegomastodon cf. platensis	La Paz, Rosario (Ar)	Resto esmalte gonfoterio	Enamel	32°57′31′′S; 60°40′21′′W	-32.9587	-60.6726	28	-11.07	-1.44	Late Pelistocene?	Domingo, Laura, José Luis Prado, and María Teresa Alberdi. “The Effect of Paleoecology and Paleobiogeography on Stable Isotopes of Quaternary Mammals from South America.” Quaternary Science Reviews 55 (November 8, 2012): 103–13. https://doi.org/10.1016/j.quascirev.2012.08.017.
Pampas/BIR	Argentina	Doming et al., 2012	Doming et al., 2012	LP	Gomphotheriidae	Stegomastodon platensis	Los Gaviones (Ar)?	V-376 MUESTRA 9	Enamel	33°39′44′′S; 70°39′52′′W	-33.6623	-70.6645	591	-7.16	-3.54	Late Pelistocene	Domingo, Laura, José Luis Prado, and María Teresa Alberdi. “The Effect of Paleoecology and Paleobiogeography on Stable Isotopes of Quaternary Mammals from South America.” Quaternary Science Reviews 55 (November 8, 2012): 103–13. https://doi.org/10.1016/j.quascirev.2012.08.017.
Pampas/BIR	Argentina	Doming et al., 2012	Prado et al. (2011)	LP	Equus	Hippidion principale	Luján (Ar)	MACN 10441	Enamel				10	-10.6	-0.7	28,0-10,0	Domingo, Laura, José Luis Prado, and María Teresa Alberdi. “The Effect of Paleoecology and Paleobiogeography on Stable Isotopes of Quaternary Mammals from South America.” Quaternary Science Reviews 55 (November 8, 2012): 103–13. https://doi.org/10.1016/j.quascirev.2012.08.017.
Pampas/BIR	Argentina	Sánchez et al., 2004		LP	Gomphotheriidae	S. platensis (late Pl)	Magdalena (Ar)	31-VII.16.1	Enamel	35°4′50′′S; 57°31′3′′W	-35.0806	-57.5177	50	-7.46	-0.83	Late Pleistocene	Sánchez, Begoña, José Luis Prado, and María Teresa Alberdi. 2004. “Feeding Ecology, Dispersal, and Extinction of South American Pleistocene Gomphotheres (Gomphotheriidae, Proboscidea).” Paleobiology 30 (1): 146–61.
Pampas/BIR	Argentina	Sánchez et al., 2004		LP	Gomphotheriidae	S. platensis (late Pl)	Magdalena (Ar)	31-VII.16.1	Enamel	35°4′50′′S; 57°31′3′′W	-35.0806	-57.5177	50	-7.4	-0.77	Late Pleistocene	Sánchez, Begoña, José Luis Prado, and María Teresa Alberdi. 2004. “Feeding Ecology, Dispersal, and Extinction of South American Pleistocene Gomphotheres (Gomphotheriidae, Proboscidea).” Paleobiology 30 (1): 146–61.
Pampas/BIR	Argentina	Doming et al., 2012	Sánchez et al. (2004)	LP	Gomphotheriidae	Stegomastodon platensis	Magdalena (Ar)	31-VII.16.1	Enamel	35°4′50′′S; 57°31′3′′W	-35.0806	-57.5177	50	-7.46	-0.83	Late Pleistocene	Domingo, Laura, José Luis Prado, and María Teresa Alberdi. “The Effect of Paleoecology and Paleobiogeography on Stable Isotopes of Quaternary Mammals from South America.” Quaternary Science Reviews 55 (November 8, 2012): 103–13. https://doi.org/10.1016/j.quascirev.2012.08.017.
Pampas/BIR	Argentina	Doming et al., 2012	Sánchez et al. (2004)	LP	Gomphotheriidae	Stegomastodon platensis	Magdalena (Ar)	31-VII.16.1	Enamel	35°4′50′′S; 57°31′3′′W	-35.0806	-57.5177	50	-7.4	-0.77	Late Pleistocene	Domingo, Laura, José Luis Prado, and María Teresa Alberdi. “The Effect of Paleoecology and Paleobiogeography on Stable Isotopes of Quaternary Mammals from South America.” Quaternary Science Reviews 55 (November 8, 2012): 103–13. https://doi.org/10.1016/j.quascirev.2012.08.017.
Pampas/BIR	Argentina	Doming et al., 2012	Doming et al., 2012	LP	Gomphotheriidae	Stegomastodon platensis	Maipú (Ar)	MACN-14025	Enamel				15	-7.65	-1.07	Late Pleistocene	Domingo, Laura, José Luis Prado, and María Teresa Alberdi. “The Effect of Paleoecology and Paleobiogeography on Stable Isotopes of Quaternary Mammals from South America.” Quaternary Science Reviews 55 (November 8, 2012): 103–13. https://doi.org/10.1016/j.quascirev.2012.08.017.
Pampas/BIR	Argentina	Sánchez et al., 2004		LP	Gomphotheriidae	S. platensis (late Pl)	Mercedes (Ar)	MLP 505	Enamel	34°39′2′′S; 59°25′54′′W	-34.6506	-59.4317	50	-8.74	-0.46	Late Pleistocene	Sánchez, Begoña, José Luis Prado, and María Teresa Alberdi. 2004. “Feeding Ecology, Dispersal, and Extinction of South American Pleistocene Gomphotheres (Gomphotheriidae, Proboscidea).” Paleobiology 30 (1): 146–61.
Pampas/BIR	Argentina	Sánchez et al., 2004		LP	Gomphotheriidae	S. platensis (late Pl)	Mercedes (Ar)	MLP8-407	Enamel	34°39′2′′S; 59°25′54′′W	-34.6506	-59.4317	50	-8.7	-0.19	Late Pleistocene	Sánchez, Begoña, José Luis Prado, and María Teresa Alberdi. 2004. “Feeding Ecology, Dispersal, and Extinction of South American Pleistocene Gomphotheres (Gomphotheriidae, Proboscidea).” Paleobiology 30 (1): 146–61.
Pampas/BIR	Argentina	Doming et al., 2012	Sánchez et al. (2004)	LP	Gomphotheriidae	Stegomastodon platensis	Mercedes (Ar)	MLP 505	Enamel	34°39′2′′S; 59°25′54′′W	-34.6506	-59.4317	50	-8.74	-0.46	Late Pelistocene	Domingo, Laura, José Luis Prado, and María Teresa Alberdi. “The Effect of Paleoecology and Paleobiogeography on Stable Isotopes of Quaternary Mammals from South America.” Quaternary Science Reviews 55 (November 8, 2012): 103–13. https://doi.org/10.1016/j.quascirev.2012.08.017.
Pampas/BIR	Argentina	Doming et al., 2012	Sánchez et al. (2004)	LP	Gomphotheriidae	Stegomastodon platensis	Mercedes (Ar)	MLP8-407	Enamel	34°39′2′′S; 59°25′54′′W	-34.6506	-59.4317	50	-8.7	-0.58	Late Pelistocene	Domingo, Laura, José Luis Prado, and María Teresa Alberdi. “The Effect of Paleoecology and Paleobiogeography on Stable Isotopes of Quaternary Mammals from South America.” Quaternary Science Reviews 55 (November 8, 2012): 103–13. https://doi.org/10.1016/j.quascirev.2012.08.017.
Pampas/BIR	Argentina	Doming et al., 2012	Doming et al., 2012	LP	Gomphotheriidae	Stegomastodon platensis	Mercedes (Ar)	MACN-14936	Enamel	34°39′2′′S; 59°25′54′′W	-34.6506	-59.4317	45	-6.83	-1.87	Late Pelistocene	Domingo, Laura, José Luis Prado, and María Teresa Alberdi. “The Effect of Paleoecology and Paleobiogeography on Stable Isotopes of Quaternary Mammals from South America.” Quaternary Science Reviews 55 (November 8, 2012): 103–13. https://doi.org/10.1016/j.quascirev.2012.08.017.
Pampas/BIR	Argentina	Doming et al., 2012	Doming et al., 2012	LP	Gomphotheriidae	Stegomastodon platensis	Mercedes (Ar)	MACN-14935	Enamel	34°39′2′′S; 59°25′54′′W	-34.6506	-59.4317	45	-6.33	-1.54	Late Pelistocene	Domingo, Laura, José Luis Prado, and María Teresa Alberdi. “The Effect of Paleoecology and Paleobiogeography on Stable Isotopes of Quaternary Mammals from South America.” Quaternary Science Reviews 55 (November 8, 2012): 103–13. https://doi.org/10.1016/j.quascirev.2012.08.017.
Pampas/BIR	Argentina	Doming et al., 2012	Doming et al., 2012	LP	Gomphotheriidae	Stegomastodon cf. platensis	Museo F y C. Ameghino, AR	Rosario 314	Enamel				28	-4.19	-1.91	Late Pelistocene?	Domingo, Laura, José Luis Prado, and María Teresa Alberdi. “The Effect of Paleoecology and Paleobiogeography on Stable Isotopes of Quaternary Mammals from South America.” Quaternary Science Reviews 55 (November 8, 2012): 103–13. https://doi.org/10.1016/j.quascirev.2012.08.017.
Pampas/BIR	Argentina	Doming et al., 2012	Prado et al. (2011)	LP	Equus	Equus neogeus	Punta Hermengo (Ar)	MLP s/s	Tooth (E+D)	38°17′11′′S; 57°50′9′′W	-38.2865	-57.8358	10	-7.2	-1.18	28,0-10,0	Domingo, Laura, José Luis Prado, and María Teresa Alberdi. “The Effect of Paleoecology and Paleobiogeography on Stable Isotopes of Quaternary Mammals from South America.” Quaternary Science Reviews 55 (November 8, 2012): 103–13. https://doi.org/10.1016/j.quascirev.2012.08.017.
Pampas/BIR	Argentina	Doming et al., 2012	Prado et al. (2011)	TP-EH	Equus	Equus neogeus	Paso Otero (Ar)	MLP 80-VIII-13-93	Enamel	37°37′24′′S; 58°33′7′′W	-37.6233	-58.5521	10	-10.2	0.37	28,0-10,0	Domingo, Laura, José Luis Prado, and María Teresa Alberdi. “The Effect of Paleoecology and Paleobiogeography on Stable Isotopes of Quaternary Mammals from South America.” Quaternary Science Reviews 55 (November 8, 2012): 103–13. https://doi.org/10.1016/j.quascirev.2012.08.017.	https://www.soc.unicen.edu.ar/newsletter/nro5/nuestros_docentes/gutierrez.htm
Pampas/BIR	Argentina	Doming et al., 2012	Doming et al., 2012	TP-EH	Gomphotheriidae	Stegomastodon platensis	Punta de Agua (Ar)	MHIN-UNSL-GEO V-515 28	Enamel				590	-5.88	-2.14	14,0-8,0	Domingo, Laura, José Luis Prado, and María Teresa Alberdi. “The Effect of Paleoecology and Paleobiogeography on Stable Isotopes of Quaternary Mammals from South America.” Quaternary Science Reviews 55 (November 8, 2012): 103–13. https://doi.org/10.1016/j.quascirev.2012.08.017.
Pampas/BIR	Argentina	Doming et al., 2012	Sánchez et al. (2004)	LP	Gomphotheriidae	Stegomastodon platensis	Río Quequén Grande (Ar)	40.VII.17.1	Enamel	36°50′21′′S; 60°18′34′′W	-36.8392	-60.3096	100	-10.53	-1.95	Late Pleistocene	Domingo, Laura, José Luis Prado, and María Teresa Alberdi. “The Effect of Paleoecology and Paleobiogeography on Stable Isotopes of Quaternary Mammals from South America.” Quaternary Science Reviews 55 (November 8, 2012): 103–13. https://doi.org/10.1016/j.quascirev.2012.08.017.
Pampas/BIR	Argentina	Doming et al., 2012	Sánchez et al. (2004)	LP	Gomphotheriidae	Stegomastodon platensis	Río Quequén Grande (Ar)	40.VII.17.1	Enamel	36°50′21′′S; 60°18′34′′W	-36.8392	-60.3096	100	-10.42	-1.68	Late Pleistocene	Domingo, Laura, José Luis Prado, and María Teresa Alberdi. “The Effect of Paleoecology and Paleobiogeography on Stable Isotopes of Quaternary Mammals from South America.” Quaternary Science Reviews 55 (November 8, 2012): 103–13. https://doi.org/10.1016/j.quascirev.2012.08.017.
Pampas/BIR	Argentina	Doming et al., 2012	Prado et al. (2011)	TP-EH	Equus	Equus neogeus	Río Quequén Salado (Ar)	MACN 9753	Enamel	38°26′21′′S; 60°39′52′′W	-38.4393	-60.6645	100	-9.9	-0.4	28,0-10,0	Domingo, Laura, José Luis Prado, and María Teresa Alberdi. “The Effect of Paleoecology and Paleobiogeography on Stable Isotopes of Quaternary Mammals from South America.” Quaternary Science Reviews 55 (November 8, 2012): 103–13. https://doi.org/10.1016/j.quascirev.2012.08.017.
Pampas/BIR	Argentina	Doming et al., 2012	MacFadden et al. (1999)	TP-EH	Equus	Equus neogeus	Río Quequén Salado (Ar)	MLP.52.X.5-3	Enamel	38°26′21′′S; 60°39′52′′W	-38.4393	-60.6645	100	-8.5	-0.21	12,8-11,5	Domingo, Laura, José Luis Prado, and María Teresa Alberdi. “The Effect of Paleoecology and Paleobiogeography on Stable Isotopes of Quaternary Mammals from South America.” Quaternary Science Reviews 55 (November 8, 2012): 103–13. https://doi.org/10.1016/j.quascirev.2012.08.017.
Pampas/BIR	Argentina	Doming et al., 2012	MacFadden et al. (1999)	TP-EH	Equus	Equus neogeus	Río Quequén Salado (Ar)	MLP.52.X.5-3	Enamel	38°26′21′′S; 60°39′52′′W	-38.4393	-60.6645	100	-7.8	-0.02	12,8-11,5	Domingo, Laura, José Luis Prado, and María Teresa Alberdi. “The Effect of Paleoecology and Paleobiogeography on Stable Isotopes of Quaternary Mammals from South America.” Quaternary Science Reviews 55 (November 8, 2012): 103–13. https://doi.org/10.1016/j.quascirev.2012.08.017.
Pampas/BIR	Argentina	Doming et al., 2012	Doming et al., 2012	LP	Equus	Equus (Amerhippus) cf. neogeus	Río Rosario (Ar)	V-469 MUESTRA 12	Enamel?				910	-3.65	-0.75	Late Pleistocene	Domingo, Laura, José Luis Prado, and María Teresa Alberdi. “The Effect of Paleoecology and Paleobiogeography on Stable Isotopes of Quaternary Mammals from South America.” Quaternary Science Reviews 55 (November 8, 2012): 103–13. https://doi.org/10.1016/j.quascirev.2012.08.017.
Pampas/BIR	Argentina	Doming et al., 2012	Prado et al. (2011)	LP	Equus	Hippidion principale	Río Salado (Ar)	MACN 5667	Enamel	35°44'82′'S; 58°45'87′'W	-35.747	-58.777	10	-12	-2.05	14,040 ±50 to 12,100 ±100	Domingo, Laura, José Luis Prado, and María Teresa Alberdi. “The Effect of Paleoecology and Paleobiogeography on Stable Isotopes of Quaternary Mammals from South America.” Quaternary Science Reviews 55 (November 8, 2012): 103–13. https://doi.org/10.1016/j.quascirev.2012.08.017.	Fucks, E., Pisano, M.F., Huarte, R.A., Di Lello, C.V., Mari, F., and Carbonari, J.E. (2015). Stratigraphy of the fluvial deposits of the Salado river basin, Buenos Aires Province: Lithology, chronology and paleoclimate. J. South Am. Earth Sci. 60, 129–139. https://doi.org/10.1016/j.jsames.2015.03.007.		Pommarés, N.N., Fucks, E.E., Pisano, M.F., Luengo, M.S., Ramos, N.A., and Di Lello, C.V. (2021). Late Pleistocene-Holocene paleoenvironments in the middle basin of the Salado river, province of Buenos Aires, Argentina. J. South Am. Earth Sci. 105, 103001. https://doi.org/10.1016/j.jsames.2020.103001.
Pampas/BIR	Argentina	Doming et al., 2012	Prado et al. (2011)	LP	Equus	Hippidion principale	Río Salado (Ar)	MACN 5667	Enamel	35°44'82′'S; 58°45'87′'W	-35.747	-58.777	10	-10.1	-2.54	14,040 ±50 to 12,100 ±100	Domingo, Laura, José Luis Prado, and María Teresa Alberdi. “The Effect of Paleoecology and Paleobiogeography on Stable Isotopes of Quaternary Mammals from South America.” Quaternary Science Reviews 55 (November 8, 2012): 103–13. https://doi.org/10.1016/j.quascirev.2012.08.017.	Fucks, E., Pisano, M.F., Huarte, R.A., Di Lello, C.V., Mari, F., and Carbonari, J.E. (2015). Stratigraphy of the fluvial deposits of the Salado river basin, Buenos Aires Province: Lithology, chronology and paleoclimate. J. South Am. Earth Sci. 60, 129–139. https://doi.org/10.1016/j.jsames.2015.03.007.		Pommarés, N.N., Fucks, E.E., Pisano, M.F., Luengo, M.S., Ramos, N.A., and Di Lello, C.V. (2021). Late Pleistocene-Holocene paleoenvironments in the middle basin of the Salado river, province of Buenos Aires, Argentina. J. South Am. Earth Sci. 105, 103001. https://doi.org/10.1016/j.jsames.2020.103001.
Pampas/BIR	Argentina	Doming et al., 2012	Prado et al. (2011)	LP	Equus	Hippidion principale	Río Salado (Ar)	MACN 5056	Enamel	35°44'82′'S; 58°45'87′'W	-35.747	-58.777	10	-8.2	-0.79	14,040 ±50 to 12,100 ±100	Domingo, Laura, José Luis Prado, and María Teresa Alberdi. “The Effect of Paleoecology and Paleobiogeography on Stable Isotopes of Quaternary Mammals from South America.” Quaternary Science Reviews 55 (November 8, 2012): 103–13. https://doi.org/10.1016/j.quascirev.2012.08.017.	Fucks, E., Pisano, M.F., Huarte, R.A., Di Lello, C.V., Mari, F., and Carbonari, J.E. (2015). Stratigraphy of the fluvial deposits of the Salado river basin, Buenos Aires Province: Lithology, chronology and paleoclimate. J. South Am. Earth Sci. 60, 129–139. https://doi.org/10.1016/j.jsames.2015.03.007.		Pommarés, N.N., Fucks, E.E., Pisano, M.F., Luengo, M.S., Ramos, N.A., and Di Lello, C.V. (2021). Late Pleistocene-Holocene paleoenvironments in the middle basin of the Salado river, province of Buenos Aires, Argentina. J. South Am. Earth Sci. 105, 103001. https://doi.org/10.1016/j.jsames.2020.103001.
Pampas/BIR	Argentina	Doming et al., 2012	Doming et al., 2012	LP	Gomphotheriidae	Stegomastodon cf. platensis	Rosario (Ar)	Rosario 190 negro	Enamel				28	-1.31	0.28	Late Pelistocene?	Domingo, Laura, José Luis Prado, and María Teresa Alberdi. “The Effect of Paleoecology and Paleobiogeography on Stable Isotopes of Quaternary Mammals from South America.” Quaternary Science Reviews 55 (November 8, 2012): 103–13. https://doi.org/10.1016/j.quascirev.2012.08.017.
Pampas/BIR	Argentina	Doming et al., 2012	Doming et al., 2012	LP	Gomphotheriidae	Stegomastodon cf. platensis	Rosario (Ar)	Rosario 190 negro	Enamel				28	-1.31	0.33
Pampas/BIR	Argentina	Doming et al., 2012	Doming et al., 2012	LP	Gomphotheriidae	Stegomastodon cf. platensis	Rosario. Museo F y C Ameghino (Ar)	Rosario 25.VI.2007	Enamel				28	-5.07	-1.11	Late Pelistocene?	Domingo, Laura, José Luis Prado, and María Teresa Alberdi. “The Effect of Paleoecology and Paleobiogeography on Stable Isotopes of Quaternary Mammals from South America.” Quaternary Science Reviews 55 (November 8, 2012): 103–13. https://doi.org/10.1016/j.quascirev.2012.08.017.
Pampas/BIR	Argentina	Sánchez et al., 2004		TP-EH	Gomphotheriidae	S. platensis (late Pl)	Tapalqué (Ar)	44-XII.29.1	Enamel	37°11′2′′S; 59°26′55′′W	-37.1839	-59.4487	50	-9.02	0.28	~11.6 cal. kya	Sánchez, Begoña, José Luis Prado, and María Teresa Alberdi. 2004. “Feeding Ecology, Dispersal, and Extinction of South American Pleistocene Gomphotheres (Gomphotheriidae, Proboscidea).” Paleobiology 30 (1): 146–61.			Chichkoyan, K.V., and Nami, H.G. (2025). Through the eyes of the megafauna: Early human settlement and isotopy in the south American Southern Cone. Quaternary 8, 14. https://doi.org/10.3390/quat8010014.
Pampas/BIR	Argentina	Doming et al., 2012	Sánchez et al. (2004)	LP	Gomphotheriidae	Stegomastodon platensis	Tapalqué (Ar)	44.XII.29.1	Enamel	37°11′2′′S; 59°26′55′′W	-37.1839	-59.4487	50	-9.02	0.28	Late Pleistocene	Domingo, Laura, José Luis Prado, and María Teresa Alberdi. “The Effect of Paleoecology and Paleobiogeography on Stable Isotopes of Quaternary Mammals from South America.” Quaternary Science Reviews 55 (November 8, 2012): 103–13. https://doi.org/10.1016/j.quascirev.2012.08.017.
Pampas/BIR	Argentina	Doming et al., 2012	Doming et al., 2012	LP	Gomphotheriidae	Stegomastodon cf. platensis	Un. Rosario. Museo F y C…, AR	Rosario 180 M3 inf	Enamel				28	-5.55	-1.32	Late Pelistocene?	Domingo, Laura, José Luis Prado, and María Teresa Alberdi. “The Effect of Paleoecology and Paleobiogeography on Stable Isotopes of Quaternary Mammals from South America.” Quaternary Science Reviews 55 (November 8, 2012): 103–13. https://doi.org/10.1016/j.quascirev.2012.08.017.
Pampas/BIR	Argentina	Doming et al., 2012	Prado et al. (2011)	TP-EH	Equus	Equus neogeus	Zanjón Seco (Ar)	MACN 14417	Enamel	38°10′5′′S; 59°10′47′′W	-38.168	-59.18	10	-10.5	-0.21	12,8-11,5	Domingo, Laura, José Luis Prado, and María Teresa Alberdi. “The Effect of Paleoecology and Paleobiogeography on Stable Isotopes of Quaternary Mammals from South America.” Quaternary Science Reviews 55 (November 8, 2012): 103–13. https://doi.org/10.1016/j.quascirev.2012.08.017.
Pampas/BIR	Argentina	Doming et al., 2012	Prado et al. (2011)	TP-EH	Equus	Equus neogeus	Zanjón Seco (Ar)	MACN 14417	Tooth (E+D)	38°10′5′′S; 59°10′47′′W	-38.168	-59.18	10	-10.4	-1.76	12,8-11,5	Domingo, Laura, José Luis Prado, and María Teresa Alberdi. “The Effect of Paleoecology and Paleobiogeography on Stable Isotopes of Quaternary Mammals from South America.” Quaternary Science Reviews 55 (November 8, 2012): 103–13. https://doi.org/10.1016/j.quascirev.2012.08.017.
Pampas/BIR	Brazil (Pampa)	Carrasco et al., 2023	Carrasco et al., 2023	LP	Equus	Equus sp.	Touro Passo Creek (Br)	MCN-PV-1461	Enamel		-29.9154	-56.4759		-4.2	1.44		Based on sediment and fossil dating, the deposition age at Touro Passo Creek ranges from 42.6 to 10 ka (Da-Rosa, 2009; Kerber et al., 2011),
Pampas/BIR	Brazil (Pampa)	Carrasco et al., 2023	Carrasco et al., 2023	LP	Equus	Equus sp.	Touro Passo Creek (Br)	MCN-PV-1462	Enamel		-29.9154	-56.4759		-5	-1.47		Based on sediment and fossil dating, the deposition age at Touro Passo Creek ranges from 42.6 to 10 ka (Da-Rosa, 2009; Kerber et al., 2011),
Pampas/BIR	Brazil (Pampa)	Carrasco et al., 2023	Carrasco et al., 2023	LP	Equus	Hippidion	Touro Passo Creek (Br)	MCN-PV-1463	Enamel		-29.9154	-56.4759		-5.2	-0.6		Based on sediment and fossil dating, the deposition age at Touro Passo Creek ranges from 42.6 to 10 ka (Da-Rosa, 2009; Kerber et al., 2011),
Southern Andes	Argentina	Doming et al., 2012	Prado et al. (2011)	LP	Equus	Equus neogeus	La Banda (Ar)	MCNAM-PV-83	Enamel	27°44′8′′S; 64°14′36′′W	-27.7357	-64.2434	200	-1	-2.83	28,0-10,0	Domingo, Laura, José Luis Prado, and María Teresa Alberdi. “The Effect of Paleoecology and Paleobiogeography on Stable Isotopes of Quaternary Mammals from South America.” Quaternary Science Reviews 55 (November 8, 2012): 103–13. https://doi.org/10.1016/j.quascirev.2012.08.017.
Southern Andes	Argentina	Doming et al., 2012	Prado et al. (2011)	TP-EH	Equus	Hippidion devillei	Mina Aguilar (Ar)	MLP 85-VII-1-2	Tooth (E+D)	23°47′56′′S; 64°46′42′′W	-23.799	-64.7784	4000	-9.8	-6.61	12,8-11,5	Domingo, Laura, José Luis Prado, and María Teresa Alberdi. “The Effect of Paleoecology and Paleobiogeography on Stable Isotopes of Quaternary Mammals from South America.” Quaternary Science Reviews 55 (November 8, 2012): 103–13. https://doi.org/10.1016/j.quascirev.2012.08.017.
Southern Andes	Bolivia	Doming et al., 2012	MacFadden et al. (1999)	LP	Equus	Equus neogeus	Nuapua-1 (Bo)	UF. Uncatalogued	Enamel	21°21'14"S; 63°59'9"W	-21.3541	-63.9858	950	0.1	-1.08	28,0-10,0	Domingo, Laura, José Luis Prado, and María Teresa Alberdi. “The Effect of Paleoecology and Paleobiogeography on Stable Isotopes of Quaternary Mammals from South America.” Quaternary Science Reviews 55 (November 8, 2012): 103–13. https://doi.org/10.1016/j.quascirev.2012.08.017.	Macfadden, Bruce J., Thure E. Cerling, John M. Harris, and José Prado. “Ancient Latitudinal Gradients of C3/C4 Grasses Interpreted from Stable Isotopes of New World Pleistocene Horse (Equus) Teeth.” Global Ecology and Biogeography 8, no. 2 (March 1, 1999): 137–49. https://doi.org/10.1046/j.1466-822X.1999.00127.x.
Southern Andes	Bolivia	Doming et al., 2012	MacFadden et al. (1999)	LP	Equus	Equus neogeus	Nuapua-3 (Bo)	UF. Uncatalogued	Enamel	21°21'14"S; 63°59'9"W	-21.3541	-63.9858	950	0.2	0.18	28,0-10,0	Domingo, Laura, José Luis Prado, and María Teresa Alberdi. “The Effect of Paleoecology and Paleobiogeography on Stable Isotopes of Quaternary Mammals from South America.” Quaternary Science Reviews 55 (November 8, 2012): 103–13. https://doi.org/10.1016/j.quascirev.2012.08.017.	Macfadden, Bruce J., Thure E. Cerling, John M. Harris, and José Prado. “Ancient Latitudinal Gradients of C3/C4 Grasses Interpreted from Stable Isotopes of New World Pleistocene Horse (Equus) Teeth.” Global Ecology and Biogeography 8, no. 2 (March 1, 1999): 137–49. https://doi.org/10.1046/j.1466-822X.1999.00127.x.
Southern Andes	Bolivia	Doming et al., 2012	Prado et al. (2011)	LP	Equus	Hippidion devillei	Tarija (Bo)	MACN 1516	Tooth (E+D)	22°3′4′′S; 64°32′8′′W	-22.0511	-64.5355	1866	-10.8	-2.15	44,0-21,1	Domingo, Laura, José Luis Prado, and María Teresa Alberdi. “The Effect of Paleoecology and Paleobiogeography on Stable Isotopes of Quaternary Mammals from South America.” Quaternary Science Reviews 55 (November 8, 2012): 103–13. https://doi.org/10.1016/j.quascirev.2012.08.017.	Prado, José L., Begoña Sánchez, and María T. Alberdi. “Ancient Feeding Ecology Inferred from Stable Isotopic Evidence from Fossil Horses in South America over the Past 3 Ma.” BMC Ecology 11 (June 14, 2011): 15. https://doi.org/10.1186/1472-6785-11-15.
Southern Andes	Bolivia	Doming et al., 2012	Prado et al. (2011)	LP	Equus	Equus insulatus	Tarija (Bo)	MACN 1509	Tooth (E+D)	22°0′33′′S; 64°51′52′′W	-22.0093	-64.8646	1866	-8.3	-2.54	44,0-21,0	Domingo, Laura, José Luis Prado, and María Teresa Alberdi. “The Effect of Paleoecology and Paleobiogeography on Stable Isotopes of Quaternary Mammals from South America.” Quaternary Science Reviews 55 (November 8, 2012): 103–13. https://doi.org/10.1016/j.quascirev.2012.08.017.	Prado, José L., Begoña Sánchez, and María T. Alberdi. “Ancient Feeding Ecology Inferred from Stable Isotopic Evidence from Fossil Horses in South America over the Past 3 Ma.” BMC Ecology 11 (June 14, 2011): 15. https://doi.org/10.1186/1472-6785-11-15.
Southern Andes	Bolivia	Doming et al., 2012	Prado et al. (2011)	LP	Equus	Equus insulatus	Tarija (Bo)	MACN 1501B	Tooth (E+D)	22°0′33′′S; 64°51′52′′W	-22.0093	-64.8646	1866	-5	-4.58	44,0-21,0	Domingo, Laura, José Luis Prado, and María Teresa Alberdi. “The Effect of Paleoecology and Paleobiogeography on Stable Isotopes of Quaternary Mammals from South America.” Quaternary Science Reviews 55 (November 8, 2012): 103–13. https://doi.org/10.1016/j.quascirev.2012.08.017.	Prado, José L., Begoña Sánchez, and María T. Alberdi. “Ancient Feeding Ecology Inferred from Stable Isotopic Evidence from Fossil Horses in South America over the Past 3 Ma.” BMC Ecology 11 (June 14, 2011): 15. https://doi.org/10.1186/1472-6785-11-15.
Southern Andes	Bolivia	Doming et al., 2012	MacFadden et al. (1999)	LP	Equus	Equus insulatus	Tarija (Bo)	UF. Uncatalogued	Enamel	22°0′33′′S; 64°51′52′′W	-22.0093	-64.8646	1866	-4.8	-5.55	44,0-21,0	Domingo, Laura, José Luis Prado, and María Teresa Alberdi. “The Effect of Paleoecology and Paleobiogeography on Stable Isotopes of Quaternary Mammals from South America.” Quaternary Science Reviews 55 (November 8, 2012): 103–13. https://doi.org/10.1016/j.quascirev.2012.08.017.	Prado, José L., Begoña Sánchez, and María T. Alberdi. “Ancient Feeding Ecology Inferred from Stable Isotopic Evidence from Fossil Horses in South America over the Past 3 Ma.” BMC Ecology 11 (June 14, 2011): 15. https://doi.org/10.1186/1472-6785-11-15.
Southern Andes	Bolivia	Doming et al., 2012	MacFadden et al. (1999)	LP	Equus	Equus insulatus	Tarija (Bo)	UF. 90653	Enamel	22°0′33′′S; 64°51′52′′W	-22.0093	-64.8646	1866	-4.1	-3.99	44,0-21,0	Domingo, Laura, José Luis Prado, and María Teresa Alberdi. “The Effect of Paleoecology and Paleobiogeography on Stable Isotopes of Quaternary Mammals from South America.” Quaternary Science Reviews 55 (November 8, 2012): 103–13. https://doi.org/10.1016/j.quascirev.2012.08.017.	Prado, José L., Begoña Sánchez, and María T. Alberdi. “Ancient Feeding Ecology Inferred from Stable Isotopic Evidence from Fossil Horses in South America over the Past 3 Ma.” BMC Ecology 11 (June 14, 2011): 15. https://doi.org/10.1186/1472-6785-11-15.
Southern Andes	Bolivia	Doming et al., 2012	MacFadden et al. (1999)	LP	Equus	Equus insulatus	Tarija (Bo)	UF. 90764	Enamel	22°0′33′′S; 64°51′52′′W	-22.0093	-64.8646	1866	-4.1	-6.52	44,0-21,0	Domingo, Laura, José Luis Prado, and María Teresa Alberdi. “The Effect of Paleoecology and Paleobiogeography on Stable Isotopes of Quaternary Mammals from South America.” Quaternary Science Reviews 55 (November 8, 2012): 103–13. https://doi.org/10.1016/j.quascirev.2012.08.017.	Prado, José L., Begoña Sánchez, and María T. Alberdi. “Ancient Feeding Ecology Inferred from Stable Isotopic Evidence from Fossil Horses in South America over the Past 3 Ma.” BMC Ecology 11 (June 14, 2011): 15. https://doi.org/10.1186/1472-6785-11-15.
Southern Andes	Bolivia	Doming et al., 2012	MacFadden et al. (1999)	LP	Equus	Equus insulatus	Tarija (Bo)	UF. 90895	Enamel	22°0′33′′S; 64°51′52′′W	-22.0093	-64.8646	1866	-3.5	-7.19	44,0-21,0	Domingo, Laura, José Luis Prado, and María Teresa Alberdi. “The Effect of Paleoecology and Paleobiogeography on Stable Isotopes of Quaternary Mammals from South America.” Quaternary Science Reviews 55 (November 8, 2012): 103–13. https://doi.org/10.1016/j.quascirev.2012.08.017.	Prado, José L., Begoña Sánchez, and María T. Alberdi. “Ancient Feeding Ecology Inferred from Stable Isotopic Evidence from Fossil Horses in South America over the Past 3 Ma.” BMC Ecology 11 (June 14, 2011): 15. https://doi.org/10.1186/1472-6785-11-15.
Southern Andes	Bolivia	Doming et al., 2012	MacFadden et al. (1999)	LP	Equus	Equus insulatus	Tarija (Bo)	UF. Uncatalogued	Enamel	22°0′33′′S; 64°51′52′′W	-22.0093	-64.8646	1866	-2.9	-6.32	44,0-21,0	Domingo, Laura, José Luis Prado, and María Teresa Alberdi. “The Effect of Paleoecology and Paleobiogeography on Stable Isotopes of Quaternary Mammals from South America.” Quaternary Science Reviews 55 (November 8, 2012): 103–13. https://doi.org/10.1016/j.quascirev.2012.08.017.	Prado, José L., Begoña Sánchez, and María T. Alberdi. “Ancient Feeding Ecology Inferred from Stable Isotopic Evidence from Fossil Horses in South America over the Past 3 Ma.” BMC Ecology 11 (June 14, 2011): 15. https://doi.org/10.1186/1472-6785-11-15.
Southern Andes	Bolivia	Doming et al., 2012	MacFadden et al. (1999)	LP	Equus	Equus insulatus	Tarija (Bo)	UF. 90750	Enamel	22°0′33′′S; 64°51′52′′W	-22.0093	-64.8646	1866	-2.9	-4.58	44,0-21,0	Domingo, Laura, José Luis Prado, and María Teresa Alberdi. “The Effect of Paleoecology and Paleobiogeography on Stable Isotopes of Quaternary Mammals from South America.” Quaternary Science Reviews 55 (November 8, 2012): 103–13. https://doi.org/10.1016/j.quascirev.2012.08.017.	Prado, José L., Begoña Sánchez, and María T. Alberdi. “Ancient Feeding Ecology Inferred from Stable Isotopic Evidence from Fossil Horses in South America over the Past 3 Ma.” BMC Ecology 11 (June 14, 2011): 15. https://doi.org/10.1186/1472-6785-11-15.
Southern Andes	Bolivia	Doming et al., 2012	MacFadden et al. (1999)	LP	Equus	Equus insulatus	Tarija (Bo)	UF. 91972	Enamel	22°0′33′′S; 64°51′52′′W	-22.0093	-64.8646	1866	-2.7	-5.84	44,0-21,0	Domingo, Laura, José Luis Prado, and María Teresa Alberdi. “The Effect of Paleoecology and Paleobiogeography on Stable Isotopes of Quaternary Mammals from South America.” Quaternary Science Reviews 55 (November 8, 2012): 103–13. https://doi.org/10.1016/j.quascirev.2012.08.017.	Prado, José L., Begoña Sánchez, and María T. Alberdi. “Ancient Feeding Ecology Inferred from Stable Isotopic Evidence from Fossil Horses in South America over the Past 3 Ma.” BMC Ecology 11 (June 14, 2011): 15. https://doi.org/10.1186/1472-6785-11-15.
Southern Andes	Bolivia	Doming et al., 2012	MacFadden et al. (1999)	LP	Equus	Equus insulatus	Tarija (Bo)	UF. Uncatalogued	Enamel	22°0′33′′S; 64°51′52′′W	-22.0093	-64.8646	1866	-2.6	-4.96	44,0-21,0	Domingo, Laura, José Luis Prado, and María Teresa Alberdi. “The Effect of Paleoecology and Paleobiogeography on Stable Isotopes of Quaternary Mammals from South America.” Quaternary Science Reviews 55 (November 8, 2012): 103–13. https://doi.org/10.1016/j.quascirev.2012.08.017.	Prado, José L., Begoña Sánchez, and María T. Alberdi. “Ancient Feeding Ecology Inferred from Stable Isotopic Evidence from Fossil Horses in South America over the Past 3 Ma.” BMC Ecology 11 (June 14, 2011): 15. https://doi.org/10.1186/1472-6785-11-15.
Southern Andes	Bolivia	Doming et al., 2012	MacFadden et al. (1999)	LP	Equus	Equus insulatus	Tarija (Bo)	UF. Uncatalogued	Enamel	22°0′33′′S; 64°51′52′′W	-22.0093	-64.8646	1866	-2.3	-4.38	44,0-21,0	Domingo, Laura, José Luis Prado, and María Teresa Alberdi. “The Effect of Paleoecology and Paleobiogeography on Stable Isotopes of Quaternary Mammals from South America.” Quaternary Science Reviews 55 (November 8, 2012): 103–13. https://doi.org/10.1016/j.quascirev.2012.08.017.	Prado, José L., Begoña Sánchez, and María T. Alberdi. “Ancient Feeding Ecology Inferred from Stable Isotopic Evidence from Fossil Horses in South America over the Past 3 Ma.” BMC Ecology 11 (June 14, 2011): 15. https://doi.org/10.1186/1472-6785-11-15.
Southern Andes	Chile	González-Guarda et al., 2018 *SI*	González-Guarda et al., 2018	TP-EH	Gomphotheriidae	Stegomastodon platensis	Tagua Tagua (Ch)	SGO.PV.TT2B	M3/m3	34°25′34′′S; 71°2′23′′W	-34.4286	-71.0399	200	-7.56	-12.45	13,805-14,524; ∼13,800 cal y B.P.	Pérez-Crespo, Víctor Adrián, José Luis Prado, María Teresa Alberdi, Joaquín Arroyo-Cabrales, and Eileen Johnson. “Feeding Ecology of the Gomphotheres (Proboscidea, Gomphotheriidae) of America.” Quaternary Science Reviews 229, no. 106126 (February 1, 2020): 106126. https://doi.org/10.1016/j.quascirev.2019.106126.	González-Guarda, Erwin, Ricardo A. Segovia, Matías Valenzuela, Lidiane Asevedo, Natalia Villavicencio, Carlos Tornero, Iván Ramírez-Pedraza, et al. “The Extinct Notiomastodon Platensis (Proboscidea, Gomphoteriidae) Inhabited Mediterranean Ecosystems during the Late Pleistocene in North-Central Chile (31°S–36°S).” Quaternary Science Reviews 344, no. 108957 (November 15, 2024): 108957. https://doi.…
Southern Andes	Chile	González-Guarda et al., 2018	González-Guarda et al., 2018	LP	Gomphotheriidae	Stegomastodon platensis	Algarrobo (Ch)	MUSA0354a	M2/m2	33°23′8′′S; 71°40′22′′W	-33.3856	-71.6728	10	-11.8	-2.43	late Pleistocene	Pérez-Crespo, Víctor Adrián, José Luis Prado, María Teresa Alberdi, Joaquín Arroyo-Cabrales, and Eileen Johnson. “Feeding Ecology of the Gomphotheres (Proboscidea, Gomphotheriidae) of America.” Quaternary Science Reviews 229, no. 106126 (February 1, 2020): 106126. https://doi.org/10.1016/j.quascirev.2019.106126.	González-Guarda, Erwin, Alia Petermann-Pichincura, Carlos Tornero, Laura Domingo, Jordi Agustí, Mario Pino, Ana M. Abarzúa, et al. “Multiproxy Evidence for Leaf-Browsing and Closed Habitats in Extinct Proboscideans (Mammalia, Proboscidea) from Central Chile.” Proceedings of the National Academy of Sciences of the United States of America 115, no. 37 (September 11, 2018): 9258–63. https://doi.org/…
Southern Andes	Chile	Perez-Crespo et al. 2020	González-Guarda et al., 2017; 2018	TP-EH	Gomphotheriidae	Stegomastodon platensis / Notio	Alto de Boroa (Ch)	MRA2461	M3	38°52′40′′S; 72°50′2′′W	-38.8777	-72.8338	60	-13.8	-4.92	13,545-13,770	Pérez-Crespo, Víctor Adrián, José Luis Prado, María Teresa Alberdi, Joaquín Arroyo-Cabrales, and Eileen Johnson. “Feeding Ecology of the Gomphotheres (Proboscidea, Gomphotheriidae) of America.” Quaternary Science Reviews 229, no. 106126 (February 1, 2020): 106126. https://doi.org/10.1016/j.quascirev.2019.106126.	González-Guarda, Erwin, Alia Petermann-Pichincura, Carlos Tornero, Laura Domingo, Jordi Agustí, Mario Pino, Ana M. Abarzúa, et al. “Multiproxy Evidence for Leaf-Browsing and Closed Habitats in Extinct Proboscideans (Mammalia, Proboscidea) from Central Chile.” Proceedings of the National Academy of Sciences of the United States of America 115, no. 37 (September 11, 2018): 9258–63. https://doi.org/…
Southern Andes	Chile	González-Guarda et al., 2018	González-Guarda et al., 2018	TP-EH	Gomphotheriidae	Stegomastodon platensis / Notio	Alto de Boroa (Ch)	MRA2462	M3	38°52′40′′S; 72°50′2′′W	-38.8777	-72.8338	60	-12.9	-5.22	13,545-13,770 cal BP	Pérez-Crespo, Víctor Adrián, José Luis Prado, María Teresa Alberdi, Joaquín Arroyo-Cabrales, and Eileen Johnson. “Feeding Ecology of the Gomphotheres (Proboscidea, Gomphotheriidae) of America.” Quaternary Science Reviews 229, no. 106126 (February 1, 2020): 106126. https://doi.org/10.1016/j.quascirev.2019.106126.	González-Guarda, Erwin, Alia Petermann-Pichincura, Carlos Tornero, Laura Domingo, Jordi Agustí, Mario Pino, Ana M. Abarzúa, et al. “Multiproxy Evidence for Leaf-Browsing and Closed Habitats in Extinct Proboscideans (Mammalia, Proboscidea) from Central Chile.” Proceedings of the National Academy of Sciences of the United States of America 115, no. 37 (September 11, 2018): 9258–63. https://doi.org/…
Southern Andes	Chile	González-Guarda et al., 2018	González-Guarda et al., 2018	LP	Gomphotheriidae	Stegomastodon platensis	Casablanca (Ch)	Museo Historia Natural de Valparaíso	M3	33°19′14′′S; 71°24′36′′W	-33.3205	-71.41	269	-9.07	-0.64	late Pleistocene	Pérez-Crespo, Víctor Adrián, José Luis Prado, María Teresa Alberdi, Joaquín Arroyo-Cabrales, and Eileen Johnson. “Feeding Ecology of the Gomphotheres (Proboscidea, Gomphotheriidae) of America.” Quaternary Science Reviews 229, no. 106126 (February 1, 2020): 106126. https://doi.org/10.1016/j.quascirev.2019.106126.	González-Guarda, Erwin, Alia Petermann-Pichincura, Carlos Tornero, Laura Domingo, Jordi Agustí, Mario Pino, Ana M. Abarzúa, et al. “Multiproxy Evidence for Leaf-Browsing and Closed Habitats in Extinct Proboscideans (Mammalia, Proboscidea) from Central Chile.” Proceedings of the National Academy of Sciences of the United States of America 115, no. 37 (September 11, 2018): 9258–63. https://doi.org/…
Southern Andes	Chile	Perez-Crespo et al. 2020	González-Guarda et al., 2017; 2018	TP-EH	Gomphotheriidae	Stegomastodon platensis	Castro (Ch)	MMC 5	M3	42°28′56′′S; 73°45′51′′W	-42.4823	-73.7642	50	-13.64	-5.7	13,270-15,685	Pérez-Crespo, Víctor Adrián, José Luis Prado, María Teresa Alberdi, Joaquín Arroyo-Cabrales, and Eileen Johnson. “Feeding Ecology of the Gomphotheres (Proboscidea, Gomphotheriidae) of America.” Quaternary Science Reviews 229, no. 106126 (February 1, 2020): 106126. https://doi.org/10.1016/j.quascirev.2019.106126.	González-Guarda, Erwin, Alia Petermann-Pichincura, Carlos Tornero, Laura Domingo, Jordi Agustí, Mario Pino, Ana M. Abarzúa, et al. “Multiproxy Evidence for Leaf-Browsing and Closed Habitats in Extinct Proboscideans (Mammalia, Proboscidea) from Central Chile.” Proceedings of the National Academy of Sciences of the United States of America 115, no. 37 (September 11, 2018): 9258–63. https://doi.org/…
Southern Andes	Chile	Perez-Crespo et al. 2020	González-Guarda et al., 2017; 2018	TP-EH	Gomphotheriidae	Stegomastodon platensis	Castro (Ch)	MMC 6	m3	42°28′56′′S; 73°45′51′′W	-42.4823	-73.7642	50	-13.2	-5.23	13,270-15,685	Pérez-Crespo, Víctor Adrián, José Luis Prado, María Teresa Alberdi, Joaquín Arroyo-Cabrales, and Eileen Johnson. “Feeding Ecology of the Gomphotheres (Proboscidea, Gomphotheriidae) of America.” Quaternary Science Reviews 229, no. 106126 (February 1, 2020): 106126. https://doi.org/10.1016/j.quascirev.2019.106126.	González-Guarda, Erwin, Alia Petermann-Pichincura, Carlos Tornero, Laura Domingo, Jordi Agustí, Mario Pino, Ana M. Abarzúa, et al. “Multiproxy Evidence for Leaf-Browsing and Closed Habitats in Extinct Proboscideans (Mammalia, Proboscidea) from Central Chile.” Proceedings of the National Academy of Sciences of the United States of America 115, no. 37 (September 11, 2018): 9258–63. https://doi.org/…
Southern Andes	Chile	Perez-Crespo et al. 2020	González-Guarda et al., 2017; 2018	TP-EH	Gomphotheriidae	Stegomastodon platensis	Chan Chan (Ch)	UACh PV CHA 01	M3	39°32′19′′S; 73°14′30′′W	-39.5388	-73.2417	10	-11.7	-3.84	11,745-12,050	Pérez-Crespo, Víctor Adrián, José Luis Prado, María Teresa Alberdi, Joaquín Arroyo-Cabrales, and Eileen Johnson. “Feeding Ecology of the Gomphotheres (Proboscidea, Gomphotheriidae) of America.” Quaternary Science Reviews 229, no. 106126 (February 1, 2020): 106126. https://doi.org/10.1016/j.quascirev.2019.106126.	González-Guarda, Erwin, Alia Petermann-Pichincura, Carlos Tornero, Laura Domingo, Jordi Agustí, Mario Pino, Ana M. Abarzúa, et al. “Multiproxy Evidence for Leaf-Browsing and Closed Habitats in Extinct Proboscideans (Mammalia, Proboscidea) from Central Chile.” Proceedings of the National Academy of Sciences of the United States of America 115, no. 37 (September 11, 2018): 9258–63. https://doi.org/…
Southern Andes	Chile	Sánchez et al., 2004		LP	Gomphotheriidae	C. hyodon (late Pl)	Chile (Ch)		Enamel					-11.8	-4.31	Late Pleistocene	Sánchez, Begoña, José Luis Prado, and María Teresa Alberdi. 2004. “Feeding Ecology, Dispersal, and Extinction of South American Pleistocene Gomphotheres (Gomphotheriidae, Proboscidea).” Paleobiology 30 (1): 146–61.
Southern Andes	Chile	Perez-Crespo et al. 2020	González-Guarda et al., 2017; 2018	TP-EH	Gomphotheriidae	Stegomastodon platensis	Choroico (Ch)	UACh PV CHO 01	M3				90	-14.41	-5.48	13,070-13,264	Pérez-Crespo, Víctor Adrián, José Luis Prado, María Teresa Alberdi, Joaquín Arroyo-Cabrales, and Eileen Johnson. “Feeding Ecology of the Gomphotheres (Proboscidea, Gomphotheriidae) of America.” Quaternary Science Reviews 229, no. 106126 (February 1, 2020): 106126. https://doi.org/10.1016/j.quascirev.2019.106126.	González-Guarda, Erwin, Alia Petermann-Pichincura, Carlos Tornero, Laura Domingo, Jordi Agustí, Mario Pino, Ana M. Abarzúa, et al. “Multiproxy Evidence for Leaf-Browsing and Closed Habitats in Extinct Proboscideans (Mammalia, Proboscidea) from Central Chile.” Proceedings of the National Academy of Sciences of the United States of America 115, no. 37 (September 11, 2018): 9258–63. https://doi.org/…
Southern Andes	Chile	Sánchez et al., 2004 / González-Guarda et al., 2018	González-Guarda et al., 2018	TP-EH	Gomphotheriidae	C. hyodon (late Pl) / Stegomastodon platensis	El Parral (Ch)	SGO.PV.17a	M3	36°8′29′′S; 71°49′19′′W	-36.1414	-71.8222	1261	-12.5	-4.71	late Pleistocene	Pérez-Crespo, Víctor Adrián, José Luis Prado, María Teresa Alberdi, Joaquín Arroyo-Cabrales, and Eileen Johnson. “Feeding Ecology of the Gomphotheres (Proboscidea, Gomphotheriidae) of America.” Quaternary Science Reviews 229, no. 106126 (February 1, 2020): 106126. https://doi.org/10.1016/j.quascirev.2019.106126.	González-Guarda, Erwin, Alia Petermann-Pichincura, Carlos Tornero, Laura Domingo, Jordi Agustí, Mario Pino, Ana M. Abarzúa, et al. “Multiproxy Evidence for Leaf-Browsing and Closed Habitats in Extinct Proboscideans (Mammalia, Proboscidea) from Central Chile.” Proceedings of the National Academy of Sciences of the United States of America 115, no. 37 (September 11, 2018): 9258–63. https://doi.org/…
Southern Andes	Chile	Sánchez et al., 2004		TP-EH	Gomphotheriidae	C. hyodon (late Pl)	El Parral (Ch)	SGO PV 15	Enamel	36°8′29′′S; 71°49′19′′W	-36.1414	-71.8222	350	-12	-3.92	Late Pleistocene	Sánchez, Begoña, José Luis Prado, and María Teresa Alberdi. 2004. “Feeding Ecology, Dispersal, and Extinction of South American Pleistocene Gomphotheres (Gomphotheriidae, Proboscidea).” Paleobiology 30 (1): 146–61.	González-Guarda, Erwin, Alia Petermann-Pichincura, Carlos Tornero, Laura Domingo, Jordi Agustí, Mario Pino, Ana M. Abarzúa, et al. “Multiproxy Evidence for Leaf-Browsing and Closed Habitats in Extinct Proboscideans (Mammalia, Proboscidea) from Central Chile.” Proceedings of the National Academy of Sciences of the United States of America 115, no. 37 (September 11, 2018): 9258–63. https://doi.org/…
Southern Andes	Chile	Doming et al., 2012	Sánchez et al. (2004)	TP-EH	Gomphotheriidae	Cuvieronious hyodon	El Parral (Ch)	SGO.PV.15	Enamel	36°8′29′′S; 71°49′19′′W	-36.1414	-71.8222	350	-12	-3.92	Late Pleistocene	Domingo, Laura, José Luis Prado, and María Teresa Alberdi. “The Effect of Paleoecology and Paleobiogeography on Stable Isotopes of Quaternary Mammals from South America.” Quaternary Science Reviews 55 (November 8, 2012): 103–13. https://doi.org/10.1016/j.quascirev.2012.08.017.	González-Guarda, Erwin, Alia Petermann-Pichincura, Carlos Tornero, Laura Domingo, Jordi Agustí, Mario Pino, Ana M. Abarzúa, et al. “Multiproxy Evidence for Leaf-Browsing and Closed Habitats in Extinct Proboscideans (Mammalia, Proboscidea) from Central Chile.” Proceedings of the National Academy of Sciences of the United States of America 115, no. 37 (September 11, 2018): 9258–63. https://doi.org/…
Southern Andes	Chile	Doming et al., 2012	Doming et al., 2012	TP-EH	Gomphotheriidae	Gomphoteriidae	El Parral (Ch)	SGD.PV.17	Enamel	36°8′29′′S; 71°49′19′′W	-36.1414	-71.8222	1261	-13.58	-3.96	13,0-10,0	Domingo, Laura, José Luis Prado, and María Teresa Alberdi. “The Effect of Paleoecology and Paleobiogeography on Stable Isotopes of Quaternary Mammals from South America.” Quaternary Science Reviews 55 (November 8, 2012): 103–13. https://doi.org/10.1016/j.quascirev.2012.08.017.	González-Guarda, Erwin, Alia Petermann-Pichincura, Carlos Tornero, Laura Domingo, Jordi Agustí, Mario Pino, Ana M. Abarzúa, et al. “Multiproxy Evidence for Leaf-Browsing and Closed Habitats in Extinct Proboscideans (Mammalia, Proboscidea) from Central Chile.” Proceedings of the National Academy of Sciences of the United States of America 115, no. 37 (September 11, 2018): 9258–63. https://doi.org/…
Southern Andes	Chile	Perez-Crespo et al. 2020	González-Guarda et al., 2017; 2018	LP	Gomphotheriidae	Stegomastodon platensis	Frutillar (Ch)	UACh PV FR 22	m3	41°7′33′′S; 73°3′37′′W	-41.1258	-73.0604	150	-13.33	-5.27	late Pleistocene	Pérez-Crespo, Víctor Adrián, José Luis Prado, María Teresa Alberdi, Joaquín Arroyo-Cabrales, and Eileen Johnson. “Feeding Ecology of the Gomphotheres (Proboscidea, Gomphotheriidae) of America.” Quaternary Science Reviews 229, no. 106126 (February 1, 2020): 106126. https://doi.org/10.1016/j.quascirev.2019.106126.	González-Guarda, Erwin, Alia Petermann-Pichincura, Carlos Tornero, Laura Domingo, Jordi Agustí, Mario Pino, Ana M. Abarzúa, et al. “Multiproxy Evidence for Leaf-Browsing and Closed Habitats in Extinct Proboscideans (Mammalia, Proboscidea) from Central Chile.” Proceedings of the National Academy of Sciences of the United States of America 115, no. 37 (September 11, 2018): 9258–63. https://doi.org/…
Southern Andes	Chile	Perez-Crespo et al. 2020	González-Guarda et al., 2017; 2018	LP	Gomphotheriidae	Stegomastodon platensis	Huilma (Ch)	MHMOP/H12	M2/m2	40°33′32′′S; 73°10′9′′W	-40.5589	-73.1692	136	-12.1	-5.04	late Pleistocene	Pérez-Crespo, Víctor Adrián, José Luis Prado, María Teresa Alberdi, Joaquín Arroyo-Cabrales, and Eileen Johnson. “Feeding Ecology of the Gomphotheres (Proboscidea, Gomphotheriidae) of America.” Quaternary Science Reviews 229, no. 106126 (February 1, 2020): 106126. https://doi.org/10.1016/j.quascirev.2019.106126.	González-Guarda, Erwin, Alia Petermann-Pichincura, Carlos Tornero, Laura Domingo, Jordi Agustí, Mario Pino, Ana M. Abarzúa, et al. “Multiproxy Evidence for Leaf-Browsing and Closed Habitats in Extinct Proboscideans (Mammalia, Proboscidea) from Central Chile.” Proceedings of the National Academy of Sciences of the United States of America 115, no. 37 (September 11, 2018): 9258–63. https://doi.org/…
Southern Andes	Chile	Perez-Crespo et al. 2020	González-Guarda et al., 2018	LP	Gomphotheriidae	Stegomastodon platensis	Illapel (Ch)	SGO.PV.40	M2	31°37′57′′S; 71°10′5′′W	-31.6326	-71.1683	296	-11.54	-3.58	late Pleistocene	Pérez-Crespo, Víctor Adrián, José Luis Prado, María Teresa Alberdi, Joaquín Arroyo-Cabrales, and Eileen Johnson. “Feeding Ecology of the Gomphotheres (Proboscidea, Gomphotheriidae) of America.” Quaternary Science Reviews 229, no. 106126 (February 1, 2020): 106126. https://doi.org/10.1016/j.quascirev.2019.106126.	González-Guarda, Erwin, Alia Petermann-Pichincura, Carlos Tornero, Laura Domingo, Jordi Agustí, Mario Pino, Ana M. Abarzúa, et al. “Multiproxy Evidence for Leaf-Browsing and Closed Habitats in Extinct Proboscideans (Mammalia, Proboscidea) from Central Chile.” Proceedings of the National Academy of Sciences of the United States of America 115, no. 37 (September 11, 2018): 9258–63. https://doi.org/…
Southern Andes	Chile	Perez-Crespo et al. 2020	González-Guarda et al., 2017; 2018	TP-EH	Gomphotheriidae	Stegomastodon platensis	La Plata (Ch)	UACh PV LP 13	m2	40°6′53′′S; 71°50′46′′W	-40.1147	-71.8463	150	-15.2	-5.37	14,021-14,463	Pérez-Crespo, Víctor Adrián, José Luis Prado, María Teresa Alberdi, Joaquín Arroyo-Cabrales, and Eileen Johnson. “Feeding Ecology of the Gomphotheres (Proboscidea, Gomphotheriidae) of America.” Quaternary Science Reviews 229, no. 106126 (February 1, 2020): 106126. https://doi.org/10.1016/j.quascirev.2019.106126.	González-Guarda, Erwin, Alia Petermann-Pichincura, Carlos Tornero, Laura Domingo, Jordi Agustí, Mario Pino, Ana M. Abarzúa, et al. “Multiproxy Evidence for Leaf-Browsing and Closed Habitats in Extinct Proboscideans (Mammalia, Proboscidea) from Central Chile.” Proceedings of the National Academy of Sciences of the United States of America 115, no. 37 (September 11, 2018): 9258–63. https://doi.org/…
Southern Andes	Chile	Perez-Crespo et al. 2020	González-Guarda et al., 2017; 2018	TP-EH	Gomphotheriidae	Stegomastodon platensis	La Plata (Ch)	UACh PV LP 14	m2	40°6′53′′S; 71°50′46′′W	-40.1147	-71.8463	150	-14.7	-5.86	14,021-14,463	Pérez-Crespo, Víctor Adrián, José Luis Prado, María Teresa Alberdi, Joaquín Arroyo-Cabrales, and Eileen Johnson. “Feeding Ecology of the Gomphotheres (Proboscidea, Gomphotheriidae) of America.” Quaternary Science Reviews 229, no. 106126 (February 1, 2020): 106126. https://doi.org/10.1016/j.quascirev.2019.106126.	González-Guarda, Erwin, Alia Petermann-Pichincura, Carlos Tornero, Laura Domingo, Jordi Agustí, Mario Pino, Ana M. Abarzúa, et al. “Multiproxy Evidence for Leaf-Browsing and Closed Habitats in Extinct Proboscideans (Mammalia, Proboscidea) from Central Chile.” Proceedings of the National Academy of Sciences of the United States of America 115, no. 37 (September 11, 2018): 9258–63. https://doi.org/…
Southern Andes	Chile	Perez-Crespo et al. 2020	González-Guarda et al., 2017; 2018	TP-EH	Gomphotheriidae	Stegomastodon platensis	La Plata (Ch)	UACh PV LP 15	m2	40°6′53′′S; 71°50′46′′W	-40.1147	-71.8463	150	-14.6	-6.05	14,021-14,463	Pérez-Crespo, Víctor Adrián, José Luis Prado, María Teresa Alberdi, Joaquín Arroyo-Cabrales, and Eileen Johnson. “Feeding Ecology of the Gomphotheres (Proboscidea, Gomphotheriidae) of America.” Quaternary Science Reviews 229, no. 106126 (February 1, 2020): 106126. https://doi.org/10.1016/j.quascirev.2019.106126.	González-Guarda, Erwin, Alia Petermann-Pichincura, Carlos Tornero, Laura Domingo, Jordi Agustí, Mario Pino, Ana M. Abarzúa, et al. “Multiproxy Evidence for Leaf-Browsing and Closed Habitats in Extinct Proboscideans (Mammalia, Proboscidea) from Central Chile.” Proceedings of the National Academy of Sciences of the United States of America 115, no. 37 (September 11, 2018): 9258–63. https://doi.org/…
Southern Andes	Chile	Perez-Crespo et al. 2020	Domingo et al., (2012)	LP	Gomphotheriidae	Stegomastodon platensis	La Rinconada (Ch)	El Trebal III	M3	33°36′26′′S; 70°48′53′′W	-33.6072	-70.8149	454	-11.35	-7.51	late Pleistocene	Pérez-Crespo, Víctor Adrián, José Luis Prado, María Teresa Alberdi, Joaquín Arroyo-Cabrales, and Eileen Johnson. “Feeding Ecology of the Gomphotheres (Proboscidea, Gomphotheriidae) of America.” Quaternary Science Reviews 229, no. 106126 (February 1, 2020): 106126. https://doi.org/10.1016/j.quascirev.2019.106126.	Labarca, R., Alberdi, M. T., Prado, J. L., Mansilla, P., & Mourgues, F. A. (2016). Nuevas evidencias acerca de la presencia de Stegomastodon platensis Ameghino, 1888, Proboscidea: Gomphotheriidae, en el Pleistoceno tardío de Chile central. Estudios Geológicos, 72(1), e046. https://doi.org/10.3989/egeol.42199.385
Southern Andes	Chile	Perez-Crespo et al. 2020	Domingo et al., (2012)	LP	Gomphotheriidae	Stegomastodon platensis	La Rinconada (Ch)	El Trebal I	M3	33°36′26′′S; 70°48′53′′W	-33.6072	-70.8149	454	-10.28	-10.42	late Pleistocene	Pérez-Crespo, Víctor Adrián, José Luis Prado, María Teresa Alberdi, Joaquín Arroyo-Cabrales, and Eileen Johnson. “Feeding Ecology of the Gomphotheres (Proboscidea, Gomphotheriidae) of America.” Quaternary Science Reviews 229, no. 106126 (February 1, 2020): 106126. https://doi.org/10.1016/j.quascirev.2019.106126.	Labarca, R., Alberdi, M. T., Prado, J. L., Mansilla, P., & Mourgues, F. A. (2016). Nuevas evidencias acerca de la presencia de Stegomastodon platensis Ameghino, 1888, Proboscidea: Gomphotheriidae, en el Pleistoceno tardío de Chile central. Estudios Geológicos, 72(1), e046. https://doi.org/10.3989/egeol.42199.385
Southern Andes	Chile	Doming et al., 2012	Doming et al., 2012	LP	Gomphotheriidae	Stegomastodon cf. platensis	La Rinconada (Ch)	El Trebal III	Enamel	33°36′26′′S; 70°48′53′′W	-33.6072	-70.8149	334	-11.35	-7.51	Late Pelistocene?	Domingo, Laura, José Luis Prado, and María Teresa Alberdi. “The Effect of Paleoecology and Paleobiogeography on Stable Isotopes of Quaternary Mammals from South America.” Quaternary Science Reviews 55 (November 8, 2012): 103–13. https://doi.org/10.1016/j.quascirev.2012.08.017.	Labarca, R., Alberdi, M. T., Prado, J. L., Mansilla, P., & Mourgues, F. A. (2016). Nuevas evidencias acerca de la presencia de Stegomastodon platensis Ameghino, 1888, Proboscidea: Gomphotheriidae, en el Pleistoceno tardío de Chile central. Estudios Geológicos, 72(1), e046. https://doi.org/10.3989/egeol.42199.385
Southern Andes	Chile	Doming et al., 2012	Doming et al., 2012	LP	Gomphotheriidae	Stegomastodon cf. platensis	La Rinconada (Ch)	El Trebal I	Enamel	33°36′26′′S; 70°48′53′′W	-33.6072	-70.8149	334	-10.28	-10.43	Late Pelistocene?	Domingo, Laura, José Luis Prado, and María Teresa Alberdi. “The Effect of Paleoecology and Paleobiogeography on Stable Isotopes of Quaternary Mammals from South America.” Quaternary Science Reviews 55 (November 8, 2012): 103–13. https://doi.org/10.1016/j.quascirev.2012.08.017.	Labarca, R., Alberdi, M. T., Prado, J. L., Mansilla, P., & Mourgues, F. A. (2016). Nuevas evidencias acerca de la presencia de Stegomastodon platensis Ameghino, 1888, Proboscidea: Gomphotheriidae, en el Pleistoceno tardío de Chile central. Estudios Geológicos, 72(1), e046. https://doi.org/10.3989/egeol.42199.385
Southern Andes	Chile	Perez-Crespo et al. 2020	Domingo et al.. (2012)	LP	Gomphotheriidae	Stegomastodon platensis	Limahuida (Ch)	SGO. PV.40	M3	31°38′20′′S; 71°11′22′′W	-31.6389	-71.1896	296	-11.3	-3.51	late Pleistocene	Pérez-Crespo, Víctor Adrián, José Luis Prado, María Teresa Alberdi, Joaquín Arroyo-Cabrales, and Eileen Johnson. “Feeding Ecology of the Gomphotheres (Proboscidea, Gomphotheriidae) of America.” Quaternary Science Reviews 229, no. 106126 (February 1, 2020): 106126. https://doi.org/10.1016/j.quascirev.2019.106126.
Southern Andes	Chile	Sánchez et al., 2004		LP	Gomphotheriidae	C. hyodon (late Pl)	Limahuida (Ch)	SGO PV 40	Enamel	31°38′20′′S; 71°11′22′′W	-31.6389	-71.1896	500	-11.3	-3.51	Late Pleistocene	Sánchez, Begoña, José Luis Prado, and María Teresa Alberdi. 2004. “Feeding Ecology, Dispersal, and Extinction of South American Pleistocene Gomphotheres (Gomphotheriidae, Proboscidea).” Paleobiology 30 (1): 146–61.
Southern Andes	Chile	González-Guarda et al., 2017	González-Guarda et al., 2017	TP-EH	Gomphotheriidae	Notiomastodon platensis	Los Lagos (Ch)	GEOUACh/P/LL/2	m2	39°46′0.3′′S; 72°28′53′′W	-39.7667	-72.4815		-12.8	-4.9	11,790 ± 80	González-Guarda, Erwin, Laura Domingo, Carlos Tornero, Mario Pino, Manuel Hernández Fernández, Paloma Sevilla, Natalia Villavicencio, and Jordi Agustí. “Late Pleistocene Ecological, Environmental and Climatic Reconstruction Based on Megafauna Stable Isotopes from Northwestern Chilean Patagonia.” Quaternary Science Reviews 170 (August 15, 2017): 188–202. https://doi.org/10.1016/j.quascirev.2017.06…	González-Guarda, Erwin, Alia Petermann-Pichincura, Carlos Tornero, Laura Domingo, Jordi Agustí, Mario Pino, Ana M. Abarzúa, et al. “Multiproxy Evidence for Leaf-Browsing and Closed Habitats in Extinct Proboscideans (Mammalia, Proboscidea) from Central Chile.” Proceedings of the National Academy of Sciences of the United States of America 115, no. 37 (September 11, 2018): 9258–63. https://doi.org/…
Southern Andes	Chile	Doming et al., 2012	Doming et al., 2012	LP	Gomphotheriidae	Stegomastodon platensis	Los Vilos (Ch)	SGD.PV.262	Enamel	31°54′43′′S; 71°30′50′′W	-31.9121	-71.5138	930	-10.65	-4.33	~35,0	Domingo, Laura, José Luis Prado, and María Teresa Alberdi. “The Effect of Paleoecology and Paleobiogeography on Stable Isotopes of Quaternary Mammals from South America.” Quaternary Science Reviews 55 (November 8, 2012): 103–13. https://doi.org/10.1016/j.quascirev.2012.08.017.
Southern Andes	Chile	Perez-Crespo et al. 2020	González-Guarda et al., 2017; 2018	TP-EH	Gomphotheriidae	Stegomastodon platensis	Máfil (Ch)	UACh PV MA 1	M3	39°39′57′′S; 72°57′7′′W	-39.6659	-72.9521	27	-13.4	-5.4	Last Glacial Termination	Pérez-Crespo, Víctor Adrián, José Luis Prado, María Teresa Alberdi, Joaquín Arroyo-Cabrales, and Eileen Johnson. “Feeding Ecology of the Gomphotheres (Proboscidea, Gomphotheriidae) of America.” Quaternary Science Reviews 229, no. 106126 (February 1, 2020): 106126. https://doi.org/10.1016/j.quascirev.2019.106126.	González-Guarda, Erwin, Alia Petermann-Pichincura, Carlos Tornero, Laura Domingo, Jordi Agustí, Mario Pino, Ana M. Abarzúa, et al. “Multiproxy Evidence for Leaf-Browsing and Closed Habitats in Extinct Proboscideans (Mammalia, Proboscidea) from Central Chile.” Proceedings of the National Academy of Sciences of the United States of America 115, no. 37 (September 11, 2018): 9258–63. https://doi.org/…
Southern Andes	Chile	Perez-Crespo et al. 2020	González-Guarda et al., 2017; 2018	TP-EH	Gomphotheriidae	Stegomastodon platensis	Máfil (Ch)	UACh PV MA 1	m2	39°39′57′′S; 72°57′7′′W	-39.6659	-72.9521	30	-12.9	-4.97	13,434–13,751	Pérez-Crespo, Víctor Adrián, José Luis Prado, María Teresa Alberdi, Joaquín Arroyo-Cabrales, and Eileen Johnson. “Feeding Ecology of the Gomphotheres (Proboscidea, Gomphotheriidae) of America.” Quaternary Science Reviews 229, no. 106126 (February 1, 2020): 106126. https://doi.org/10.1016/j.quascirev.2019.106126.	González-Guarda, Erwin, Alia Petermann-Pichincura, Carlos Tornero, Laura Domingo, Jordi Agustí, Mario Pino, Ana M. Abarzúa, et al. “Multiproxy Evidence for Leaf-Browsing and Closed Habitats in Extinct Proboscideans (Mammalia, Proboscidea) from Central Chile.” Proceedings of the National Academy of Sciences of the United States of America 115, no. 37 (September 11, 2018): 9258–63. https://doi.org/…
Southern Andes	Chile	Perez-Crespo et al. 2020	González-Guarda et al., 2017; 2018	LP	Gomphotheriidae	Stegomastodon platensis	Monte Verde (Ch)	MHAMM A02156	m3	41°36′14′′S; 73°9′42′′W	-41.604	-73.1616	50	-13.68	-5.23	Last Glacial Termination	Pérez-Crespo, Víctor Adrián, José Luis Prado, María Teresa Alberdi, Joaquín Arroyo-Cabrales, and Eileen Johnson. “Feeding Ecology of the Gomphotheres (Proboscidea, Gomphotheriidae) of America.” Quaternary Science Reviews 229, no. 106126 (February 1, 2020): 106126. https://doi.org/10.1016/j.quascirev.2019.106126.	González-Guarda, Erwin, Alia Petermann-Pichincura, Carlos Tornero, Laura Domingo, Jordi Agustí, Mario Pino, Ana M. Abarzúa, et al. “Multiproxy Evidence for Leaf-Browsing and Closed Habitats in Extinct Proboscideans (Mammalia, Proboscidea) from Central Chile.” Proceedings of the National Academy of Sciences of the United States of America 115, no. 37 (September 11, 2018): 9258–63. https://doi.org/…
Southern Andes	Chile	Perez-Crespo et al. 2020	González-Guarda et al., 2017; 2018	LP	Gomphotheriidae	Stegomastodon platensis	Monte Verde (Ch)	MHAMM A02137	M3	41°36′14′′S; 73°9′42′′W	-41.604	-73.1616	50	-13.12	-5.22	Last Glacial Termination	Pérez-Crespo, Víctor Adrián, José Luis Prado, María Teresa Alberdi, Joaquín Arroyo-Cabrales, and Eileen Johnson. “Feeding Ecology of the Gomphotheres (Proboscidea, Gomphotheriidae) of America.” Quaternary Science Reviews 229, no. 106126 (February 1, 2020): 106126. https://doi.org/10.1016/j.quascirev.2019.106126.	González-Guarda, Erwin, Alia Petermann-Pichincura, Carlos Tornero, Laura Domingo, Jordi Agustí, Mario Pino, Ana M. Abarzúa, et al. “Multiproxy Evidence for Leaf-Browsing and Closed Habitats in Extinct Proboscideans (Mammalia, Proboscidea) from Central Chile.” Proceedings of the National Academy of Sciences of the United States of America 115, no. 37 (September 11, 2018): 9258–63. https://doi.org/…
Southern Andes	Chile	Perez-Crespo et al. 2020	González-Guarda et al., 2017; 2018	LP	Gomphotheriidae	Stegomastodon platensis	Monte Verde (Ch)	MHAMM A02177	M3	41°36′14′′S; 73°9′42′′W	-41.604	-73.1616	50	-12.02	-7.19	Last Glacial Termination	Pérez-Crespo, Víctor Adrián, José Luis Prado, María Teresa Alberdi, Joaquín Arroyo-Cabrales, and Eileen Johnson. “Feeding Ecology of the Gomphotheres (Proboscidea, Gomphotheriidae) of America.” Quaternary Science Reviews 229, no. 106126 (February 1, 2020): 106126. https://doi.org/10.1016/j.quascirev.2019.106126.	González-Guarda, Erwin, Alia Petermann-Pichincura, Carlos Tornero, Laura Domingo, Jordi Agustí, Mario Pino, Ana M. Abarzúa, et al. “Multiproxy Evidence for Leaf-Browsing and Closed Habitats in Extinct Proboscideans (Mammalia, Proboscidea) from Central Chile.” Proceedings of the National Academy of Sciences of the United States of America 115, no. 37 (September 11, 2018): 9258–63. https://doi.org/…
Southern Andes	Chile	González-Guarda et al., 2018	González-Guarda et al., 2018	LP	Gomphotheriidae	Stegomastodon platensis	Navidad/Pupuya (Ch)	MUSA1637	M3/m3	34°0′15′′S; 71°51′10′′W	-34.0041	-71.8527	10	-10.4	-2.85	late Pleistocene	Pérez-Crespo, Víctor Adrián, José Luis Prado, María Teresa Alberdi, Joaquín Arroyo-Cabrales, and Eileen Johnson. “Feeding Ecology of the Gomphotheres (Proboscidea, Gomphotheriidae) of America.” Quaternary Science Reviews 229, no. 106126 (February 1, 2020): 106126. https://doi.org/10.1016/j.quascirev.2019.106126.	González-Guarda, Erwin, Alia Petermann-Pichincura, Carlos Tornero, Laura Domingo, Jordi Agustí, Mario Pino, Ana M. Abarzúa, et al. “Multiproxy Evidence for Leaf-Browsing and Closed Habitats in Extinct Proboscideans (Mammalia, Proboscidea) from Central Chile.” Proceedings of the National Academy of Sciences of the United States of America 115, no. 37 (September 11, 2018): 9258–63. https://doi.org/…
Southern Andes	Chile	Perez-Crespo et al. 2020	González-Guarda et al., 2017; 2018	LP	Gomphotheriidae	Stegomastodon platensis	Nochaco (Ch)	MHMOP/N11	m3	40°53′15′′S; 72°53′22′′W	-40.8876	-72.8894	181	-13.1	-6.2	15,808 – 19,398; 17,130-20,339	Pérez-Crespo, Víctor Adrián, José Luis Prado, María Teresa Alberdi, Joaquín Arroyo-Cabrales, and Eileen Johnson. “Feeding Ecology of the Gomphotheres (Proboscidea, Gomphotheriidae) of America.” Quaternary Science Reviews 229, no. 106126 (February 1, 2020): 106126. https://doi.org/10.1016/j.quascirev.2019.106126.	González-Guarda, Erwin, Alia Petermann-Pichincura, Carlos Tornero, Laura Domingo, Jordi Agustí, Mario Pino, Ana M. Abarzúa, et al. “Multiproxy Evidence for Leaf-Browsing and Closed Habitats in Extinct Proboscideans (Mammalia, Proboscidea) from Central Chile.” Proceedings of the National Academy of Sciences of the United States of America 115, no. 37 (September 11, 2018): 9258–63. https://doi.org/…
Southern Andes	Chile	Perez-Crespo et al. 2020	González-Guarda et al., 2017; 2018	LP	Gomphotheriidae	Stegomastodon platensis	Nochaco (Ch)	MHMOP/NO9	M2/m2	40°53′15′′S; 72°53′22′′W	-40.8876	-72.8894	181	-12.6	-5.01	15,808 – 19,398	Pérez-Crespo, Víctor Adrián, José Luis Prado, María Teresa Alberdi, Joaquín Arroyo-Cabrales, and Eileen Johnson. “Feeding Ecology of the Gomphotheres (Proboscidea, Gomphotheriidae) of America.” Quaternary Science Reviews 229, no. 106126 (February 1, 2020): 106126. https://doi.org/10.1016/j.quascirev.2019.106126.	González-Guarda, Erwin, Alia Petermann-Pichincura, Carlos Tornero, Laura Domingo, Jordi Agustí, Mario Pino, Ana M. Abarzúa, et al. “Multiproxy Evidence for Leaf-Browsing and Closed Habitats in Extinct Proboscideans (Mammalia, Proboscidea) from Central Chile.” Proceedings of the National Academy of Sciences of the United States of America 115, no. 37 (September 11, 2018): 9258–63. https://doi.org/…
Southern Andes	Chile	González-Guarda et al., 2017	González-Guarda et al., 2017	TP-EH	Equus	Equus andium	Paillaco (Ch)	MHMOP/PI/69	Enamel Incisor	40°4′14′′S; 72°52′21′′W	-40.0706	-72.8726		-14.7	-3.3	17,428 - 10,239; 13,026 - 13,557	González-Guarda, Erwin, Laura Domingo, Carlos Tornero, Mario Pino, Manuel Hernández Fernández, Paloma Sevilla, Natalia Villavicencio, and Jordi Agustí. “Late Pleistocene Ecological, Environmental and Climatic Reconstruction Based on Megafauna Stable Isotopes from Northwestern Chilean Patagonia.” Quaternary Science Reviews 170 (August 15, 2017): 188–202. https://doi.org/10.1016/j.quascirev.2017.06…	González-Guarda, Erwin, Alia Petermann-Pichincura, Carlos Tornero, Laura Domingo, Jordi Agustí, Mario Pino, Ana M. Abarzúa, et al. “Multiproxy Evidence for Leaf-Browsing and Closed Habitats in Extinct Proboscideans (Mammalia, Proboscidea) from Central Chile.” Proceedings of the National Academy of Sciences of the United States of America 115, no. 37 (September 11, 2018): 9258–63. https://doi.org/…
Southern Andes	Chile	González-Guarda et al., 2017	González-Guarda et al., 2017	TP-EH	Equus	Equus andium	Paillaco (Ch)	MHMOP/PI/67	Enamel Upper molar	40°4′14′′S; 72°52′21′′W	-40.0706	-72.8726		-14.7	-5.4	17,428 - 10,239; 13,026 - 13,557	González-Guarda, Erwin, Laura Domingo, Carlos Tornero, Mario Pino, Manuel Hernández Fernández, Paloma Sevilla, Natalia Villavicencio, and Jordi Agustí. “Late Pleistocene Ecological, Environmental and Climatic Reconstruction Based on Megafauna Stable Isotopes from Northwestern Chilean Patagonia.” Quaternary Science Reviews 170 (August 15, 2017): 188–202. https://doi.org/10.1016/j.quascirev.2017.06…	González-Guarda, Erwin, Alia Petermann-Pichincura, Carlos Tornero, Laura Domingo, Jordi Agustí, Mario Pino, Ana M. Abarzúa, et al. “Multiproxy Evidence for Leaf-Browsing and Closed Habitats in Extinct Proboscideans (Mammalia, Proboscidea) from Central Chile.” Proceedings of the National Academy of Sciences of the United States of America 115, no. 37 (September 11, 2018): 9258–63. https://doi.org/…
Southern Andes	Chile	González-Guarda et al., 2017	González-Guarda et al., 2017	TP-EH	Equus	Equus andium	Paillaco (Ch)	MHMOP/PI/63	Enamel Lower molar	40°4′14′′S; 72°52′21′′W	-40.0706	-72.8726		-14.1	-4.2	17,428 - 10,239; 13,026 - 13,557	González-Guarda, Erwin, Laura Domingo, Carlos Tornero, Mario Pino, Manuel Hernández Fernández, Paloma Sevilla, Natalia Villavicencio, and Jordi Agustí. “Late Pleistocene Ecological, Environmental and Climatic Reconstruction Based on Megafauna Stable Isotopes from Northwestern Chilean Patagonia.” Quaternary Science Reviews 170 (August 15, 2017): 188–202. https://doi.org/10.1016/j.quascirev.2017.06…	González-Guarda, Erwin, Alia Petermann-Pichincura, Carlos Tornero, Laura Domingo, Jordi Agustí, Mario Pino, Ana M. Abarzúa, et al. “Multiproxy Evidence for Leaf-Browsing and Closed Habitats in Extinct Proboscideans (Mammalia, Proboscidea) from Central Chile.” Proceedings of the National Academy of Sciences of the United States of America 115, no. 37 (September 11, 2018): 9258–63. https://doi.org/…
Southern Andes	Chile	González-Guarda et al., 2017	González-Guarda et al., 2017	TP-EH	Equus	Equus andium	Paillaco (Ch)	MHMOP/PI/66	Enamel Upper molar	40°4′14′′S; 72°52′21′′W	-40.0706	-72.8726		-13.9	-3	17,428 - 10,239; 13,026 - 13,557	González-Guarda, Erwin, Laura Domingo, Carlos Tornero, Mario Pino, Manuel Hernández Fernández, Paloma Sevilla, Natalia Villavicencio, and Jordi Agustí. “Late Pleistocene Ecological, Environmental and Climatic Reconstruction Based on Megafauna Stable Isotopes from Northwestern Chilean Patagonia.” Quaternary Science Reviews 170 (August 15, 2017): 188–202. https://doi.org/10.1016/j.quascirev.2017.06…	González-Guarda, Erwin, Alia Petermann-Pichincura, Carlos Tornero, Laura Domingo, Jordi Agustí, Mario Pino, Ana M. Abarzúa, et al. “Multiproxy Evidence for Leaf-Browsing and Closed Habitats in Extinct Proboscideans (Mammalia, Proboscidea) from Central Chile.” Proceedings of the National Academy of Sciences of the United States of America 115, no. 37 (September 11, 2018): 9258–63. https://doi.org/…
Southern Andes	Chile	González-Guarda et al., 2017	González-Guarda et al., 2017	TP-EH	Equus	Equus andium	Paillaco (Ch)	MHMOP/PI/71A	Enamel Incisor	40°4′14′′S; 72°52′21′′W	-40.0706	-72.8726		-12.8	-3.5	17,428 - 10,239; 13,026 - 13,557	González-Guarda, Erwin, Laura Domingo, Carlos Tornero, Mario Pino, Manuel Hernández Fernández, Paloma Sevilla, Natalia Villavicencio, and Jordi Agustí. “Late Pleistocene Ecological, Environmental and Climatic Reconstruction Based on Megafauna Stable Isotopes from Northwestern Chilean Patagonia.” Quaternary Science Reviews 170 (August 15, 2017): 188–202. https://doi.org/10.1016/j.quascirev.2017.06…	González-Guarda, Erwin, Alia Petermann-Pichincura, Carlos Tornero, Laura Domingo, Jordi Agustí, Mario Pino, Ana M. Abarzúa, et al. “Multiproxy Evidence for Leaf-Browsing and Closed Habitats in Extinct Proboscideans (Mammalia, Proboscidea) from Central Chile.” Proceedings of the National Academy of Sciences of the United States of America 115, no. 37 (September 11, 2018): 9258–63. https://doi.org/…
Southern Andes	Chile	González-Guarda et al., 2017	González-Guarda et al., 2017	TP-EH	Gomphotheriidae	Notiomastodon platensis	Paillaco (Ch)	GEOUACh/ P/MA/1	M3	40°4′14′′S; 72°52′21′′W	-40.0706	-72.8726		-14.4	-5.4	13,026 - 13,557	González-Guarda, Erwin, Laura Domingo, Carlos Tornero, Mario Pino, Manuel Hernández Fernández, Paloma Sevilla, Natalia Villavicencio, and Jordi Agustí. “Late Pleistocene Ecological, Environmental and Climatic Reconstruction Based on Megafauna Stable Isotopes from Northwestern Chilean Patagonia.” Quaternary Science Reviews 170 (August 15, 2017): 188–202. https://doi.org/10.1016/j.quascirev.2017.06…	González-Guarda, Erwin, Alia Petermann-Pichincura, Carlos Tornero, Laura Domingo, Jordi Agustí, Mario Pino, Ana M. Abarzúa, et al. “Multiproxy Evidence for Leaf-Browsing and Closed Habitats in Extinct Proboscideans (Mammalia, Proboscidea) from Central Chile.” Proceedings of the National Academy of Sciences of the United States of America 115, no. 37 (September 11, 2018): 9258–63. https://doi.org/…
Southern Andes	Chile	González-Guarda et al., 2018	González-Guarda et al., 2018	LP	Gomphotheriidae	Stegomastodon platensis	El Parral (Ch)	SGO.PV.15b	M3	36°8′29′′S; 71°49′19′′W	-36.1414	-71.8222	1261	-12	-3.92	late Pleistocene	Pérez-Crespo, Víctor Adrián, José Luis Prado, María Teresa Alberdi, Joaquín Arroyo-Cabrales, and Eileen Johnson. “Feeding Ecology of the Gomphotheres (Proboscidea, Gomphotheriidae) of America.” Quaternary Science Reviews 229, no. 106126 (February 1, 2020): 106126. https://doi.org/10.1016/j.quascirev.2019.106126.	González-Guarda, Erwin, Alia Petermann-Pichincura, Carlos Tornero, Laura Domingo, Jordi Agustí, Mario Pino, Ana M. Abarzúa, et al. “Multiproxy Evidence for Leaf-Browsing and Closed Habitats in Extinct Proboscideans (Mammalia, Proboscidea) from Central Chile.” Proceedings of the National Academy of Sciences of the United States of America 115, no. 37 (September 11, 2018): 9258–63. https://doi.org/…
Southern Andes	Chile	González-Guarda et al., 2018	González-Guarda et al., 2018	LP	Gomphotheriidae	Stegomastodon platensis	El Parral (Ch)	SGO.PV.15a	M3/m3	36°8′29′′S; 71°49′19′′W	-36.1414	-71.8222	1261	-11.42	-4.17	late Pleistocene	Pérez-Crespo, Víctor Adrián, José Luis Prado, María Teresa Alberdi, Joaquín Arroyo-Cabrales, and Eileen Johnson. “Feeding Ecology of the Gomphotheres (Proboscidea, Gomphotheriidae) of America.” Quaternary Science Reviews 229, no. 106126 (February 1, 2020): 106126. https://doi.org/10.1016/j.quascirev.2019.106126.	González-Guarda, Erwin, Alia Petermann-Pichincura, Carlos Tornero, Laura Domingo, Jordi Agustí, Mario Pino, Ana M. Abarzúa, et al. “Multiproxy Evidence for Leaf-Browsing and Closed Habitats in Extinct Proboscideans (Mammalia, Proboscidea) from Central Chile.” Proceedings of the National Academy of Sciences of the United States of America 115, no. 37 (September 11, 2018): 9258–63. https://doi.org/…
Southern Andes	Chile	González-Guarda et al., 2018	González-Guarda et al., 2018	LP	Gomphotheriidae	Stegomastodon platensis	El Parral (Ch)	SGO.PV.55	M3/m3	36°8′29′′S; 71°49′19′′W	-36.1414	-71.8222	1261	-11.12	-3.56	Pleistocene/Holocene transition	Pérez-Crespo, Víctor Adrián, José Luis Prado, María Teresa Alberdi, Joaquín Arroyo-Cabrales, and Eileen Johnson. “Feeding Ecology of the Gomphotheres (Proboscidea, Gomphotheriidae) of America.” Quaternary Science Reviews 229, no. 106126 (February 1, 2020): 106126. https://doi.org/10.1016/j.quascirev.2019.106126.	González-Guarda, Erwin, Alia Petermann-Pichincura, Carlos Tornero, Laura Domingo, Jordi Agustí, Mario Pino, Ana M. Abarzúa, et al. “Multiproxy Evidence for Leaf-Browsing and Closed Habitats in Extinct Proboscideans (Mammalia, Proboscidea) from Central Chile.” Proceedings of the National Academy of Sciences of the United States of America 115, no. 37 (September 11, 2018): 9258–63. https://doi.org/…
Southern Andes	Chile	Perez-Crespo et al. 2020	González-Guarda et al., 2017; 2018	LP	Gomphotheriidae	Stegomastodon platensis	Pilauco (Ch)	MHMOPI/628a	M2	40°31′49′′S; 73°4′27′′W	-40.5304	-73.0741	65	-13.7	-2.44	17,428-10,239; 13,240-15,644	Pérez-Crespo, Víctor Adrián, José Luis Prado, María Teresa Alberdi, Joaquín Arroyo-Cabrales, and Eileen Johnson. “Feeding Ecology of the Gomphotheres (Proboscidea, Gomphotheriidae) of America.” Quaternary Science Reviews 229, no. 106126 (February 1, 2020): 106126. https://doi.org/10.1016/j.quascirev.2019.106126.	González-Guarda, Erwin, Alia Petermann-Pichincura, Carlos Tornero, Laura Domingo, Jordi Agustí, Mario Pino, Ana M. Abarzúa, et al. “Multiproxy Evidence for Leaf-Browsing and Closed Habitats in Extinct Proboscideans (Mammalia, Proboscidea) from Central Chile.” Proceedings of the National Academy of Sciences of the United States of America 115, no. 37 (September 11, 2018): 9258–63. https://doi.org/…
Southern Andes	Chile	Perez-Crespo et al. 2020	González-Guarda et al., 2017; 2018	LP	Gomphotheriidae	Stegomastodon platensis	Pilauco (Ch)	MHMOPI/627a	M2	40°31′49′′S; 73°4′27′′W	-40.5304	-73.0741	65	-13.3	-4.56	17,428-10,239	Pérez-Crespo, Víctor Adrián, José Luis Prado, María Teresa Alberdi, Joaquín Arroyo-Cabrales, and Eileen Johnson. “Feeding Ecology of the Gomphotheres (Proboscidea, Gomphotheriidae) of America.” Quaternary Science Reviews 229, no. 106126 (February 1, 2020): 106126. https://doi.org/10.1016/j.quascirev.2019.106126.	González-Guarda, Erwin, Alia Petermann-Pichincura, Carlos Tornero, Laura Domingo, Jordi Agustí, Mario Pino, Ana M. Abarzúa, et al. “Multiproxy Evidence for Leaf-Browsing and Closed Habitats in Extinct Proboscideans (Mammalia, Proboscidea) from Central Chile.” Proceedings of the National Academy of Sciences of the United States of America 115, no. 37 (September 11, 2018): 9258–63. https://doi.org/…
Southern Andes	Chile	Perez-Crespo et al. 2020	Domingo et al., (2012)	TP-EH	Gomphotheriidae	Stegomastodon platensis	Quereo (Ch)	SGO.PV.262	M3	31°55′55′′S; 71°30′55′′W	-31.9319	-71.5155	930	-10.65	-4.32	12,703 - 12,982	Pérez-Crespo, Víctor Adrián, José Luis Prado, María Teresa Alberdi, Joaquín Arroyo-Cabrales, and Eileen Johnson. “Feeding Ecology of the Gomphotheres (Proboscidea, Gomphotheriidae) of America.” Quaternary Science Reviews 229, no. 106126 (February 1, 2020): 106126. https://doi.org/10.1016/j.quascirev.2019.106126.	González-Guarda, Erwin, Alia Petermann-Pichincura, Carlos Tornero, Laura Domingo, Jordi Agustí, Mario Pino, Ana M. Abarzúa, et al. “Multiproxy Evidence for Leaf-Browsing and Closed Habitats in Extinct Proboscideans (Mammalia, Proboscidea) from Central Chile.” Proceedings of the National Academy of Sciences of the United States of America 115, no. 37 (September 11, 2018): 9258–63. https://doi.org/…
Southern Andes	Chile	Perez-Crespo et al. 2020	González-Guarda et al., 2018	TP-EH	Gomphotheriidae	Stegomastodon platensis	Quereo (Ch)	SGO.PV.267	m3	31°55′55′′S; 71°30′55′′W	-31.9319	-71.5155	20	-10.8	-5.04	12,703 - 12,982	Pérez-Crespo, Víctor Adrián, José Luis Prado, María Teresa Alberdi, Joaquín Arroyo-Cabrales, and Eileen Johnson. “Feeding Ecology of the Gomphotheres (Proboscidea, Gomphotheriidae) of America.” Quaternary Science Reviews 229, no. 106126 (February 1, 2020): 106126. https://doi.org/10.1016/j.quascirev.2019.106126.	González-Guarda, Erwin, Alia Petermann-Pichincura, Carlos Tornero, Laura Domingo, Jordi Agustí, Mario Pino, Ana M. Abarzúa, et al. “Multiproxy Evidence for Leaf-Browsing and Closed Habitats in Extinct Proboscideans (Mammalia, Proboscidea) from Central Chile.” Proceedings of the National Academy of Sciences of the United States of America 115, no. 37 (September 11, 2018): 9258–63. https://doi.org/…
Southern Andes	Chile	González-Guarda et al., 2018	González-Guarda et al., 2018	LP	Gomphotheriidae	Stegomastodon platensis	Quilpué (Ch)	Museo Fonck	M3 2l	33°2′59′′S; 71°26′29′′W	-33.0498	-71.4415	149	-10.47	-1.18	late Pleistocene	Pérez-Crespo, Víctor Adrián, José Luis Prado, María Teresa Alberdi, Joaquín Arroyo-Cabrales, and Eileen Johnson. “Feeding Ecology of the Gomphotheres (Proboscidea, Gomphotheriidae) of America.” Quaternary Science Reviews 229, no. 106126 (February 1, 2020): 106126. https://doi.org/10.1016/j.quascirev.2019.106126.	González-Guarda, Erwin, Alia Petermann-Pichincura, Carlos Tornero, Laura Domingo, Jordi Agustí, Mario Pino, Ana M. Abarzúa, et al. “Multiproxy Evidence for Leaf-Browsing and Closed Habitats in Extinct Proboscideans (Mammalia, Proboscidea) from Central Chile.” Proceedings of the National Academy of Sciences of the United States of America 115, no. 37 (September 11, 2018): 9258–63. https://doi.org/…
Southern Andes	Chile	González-Guarda et al., 2018	González-Guarda et al., 2018	LP	Gomphotheriidae	Stegomastodon platensis	Quilpué (Ch)	Museo Fonck	M2 1l	33°2′59′′S; 71°26′29′′W	-33.0498	-71.4415	149	-9.1	-1.1	late Pleistocene	Pérez-Crespo, Víctor Adrián, José Luis Prado, María Teresa Alberdi, Joaquín Arroyo-Cabrales, and Eileen Johnson. “Feeding Ecology of the Gomphotheres (Proboscidea, Gomphotheriidae) of America.” Quaternary Science Reviews 229, no. 106126 (February 1, 2020): 106126. https://doi.org/10.1016/j.quascirev.2019.106126.	González-Guarda, Erwin, Alia Petermann-Pichincura, Carlos Tornero, Laura Domingo, Jordi Agustí, Mario Pino, Ana M. Abarzúa, et al. “Multiproxy Evidence for Leaf-Browsing and Closed Habitats in Extinct Proboscideans (Mammalia, Proboscidea) from Central Chile.” Proceedings of the National Academy of Sciences of the United States of America 115, no. 37 (September 11, 2018): 9258–63. https://doi.org/…
Southern Andes	Chile	Perez-Crespo et al. 2020	Sánchez et al., 2004 / González-Guarda et al., 2017; 2018	TP-EH	Gomphotheriidae	C. hyodon (late Pl) / Stegomastodon platensis	Río Bueno (Ch)	SGO.PV.44	M3	40°20′1.2′′S; 72°57′24′′W	-40.3336	-72.9567	150	-13.1	-4.61	13,434–13,751	Pérez-Crespo, Víctor Adrián, José Luis Prado, María Teresa Alberdi, Joaquín Arroyo-Cabrales, and Eileen Johnson. “Feeding Ecology of the Gomphotheres (Proboscidea, Gomphotheriidae) of America.” Quaternary Science Reviews 229, no. 106126 (February 1, 2020): 106126. https://doi.org/10.1016/j.quascirev.2019.106126.	González-Guarda, Erwin, Alia Petermann-Pichincura, Carlos Tornero, Laura Domingo, Jordi Agustí, Mario Pino, Ana M. Abarzúa, et al. “Multiproxy Evidence for Leaf-Browsing and Closed Habitats in Extinct Proboscideans (Mammalia, Proboscidea) from Central Chile.” Proceedings of the National Academy of Sciences of the United States of America 115, no. 37 (September 11, 2018): 9258–63. https://doi.org/…
Southern Andes	Chile	Perez-Crespo et al. 2020	González-Guarda et al., 2017; 2018	TP-EH	Gomphotheriidae	Stegomastodon platensis	Río Bueno (Ch)	SGO.PV.44	M3	40°20′1.2′′S; 72°57′24′′W	-40.3336	-72.9567	150	-12.7	-5.2	13,434–13,751	Pérez-Crespo, Víctor Adrián, José Luis Prado, María Teresa Alberdi, Joaquín Arroyo-Cabrales, and Eileen Johnson. “Feeding Ecology of the Gomphotheres (Proboscidea, Gomphotheriidae) of America.” Quaternary Science Reviews 229, no. 106126 (February 1, 2020): 106126. https://doi.org/10.1016/j.quascirev.2019.106126.	González-Guarda, Erwin, Alia Petermann-Pichincura, Carlos Tornero, Laura Domingo, Jordi Agustí, Mario Pino, Ana M. Abarzúa, et al. “Multiproxy Evidence for Leaf-Browsing and Closed Habitats in Extinct Proboscideans (Mammalia, Proboscidea) from Central Chile.” Proceedings of the National Academy of Sciences of the United States of America 115, no. 37 (September 11, 2018): 9258–63. https://doi.org/…
Southern Andes	Chile	González-Guarda et al., 2018	González-Guarda et al., 2018	LP	Gomphotheriidae	Stegomastodon platensis	Río Rapel (Ch)	MUSA1690	M3	33°57′21′′S; 71°43′13′′W	-33.9559	-71.7202	50	-13.37	-1.19	late Pleistocene	Pérez-Crespo, Víctor Adrián, José Luis Prado, María Teresa Alberdi, Joaquín Arroyo-Cabrales, and Eileen Johnson. “Feeding Ecology of the Gomphotheres (Proboscidea, Gomphotheriidae) of America.” Quaternary Science Reviews 229, no. 106126 (February 1, 2020): 106126. https://doi.org/10.1016/j.quascirev.2019.106126.	González-Guarda, Erwin, Alia Petermann-Pichincura, Carlos Tornero, Laura Domingo, Jordi Agustí, Mario Pino, Ana M. Abarzúa, et al. “Multiproxy Evidence for Leaf-Browsing and Closed Habitats in Extinct Proboscideans (Mammalia, Proboscidea) from Central Chile.” Proceedings of the National Academy of Sciences of the United States of America 115, no. 37 (September 11, 2018): 9258–63. https://doi.org/…
Southern Andes	Chile	Perez-Crespo et al. 2020	Domingo et al., (2012)	TP-EH	Gomphotheriidae	Stegomastodon platensis	Tagua Tagua (Ch)	SGO.PV.47c	M3/m3				200	-3.99	-1.82	13,805-14,524	Pérez-Crespo, Víctor Adrián, José Luis Prado, María Teresa Alberdi, Joaquín Arroyo-Cabrales, and Eileen Johnson. “Feeding Ecology of the Gomphotheres (Proboscidea, Gomphotheriidae) of America.” Quaternary Science Reviews 229, no. 106126 (February 1, 2020): 106126. https://doi.org/10.1016/j.quascirev.2019.106126.
Southern Andes	Chile	González-Guarda et al., 2018	González-Guarda et al., 2018	TP-EH	Gomphotheriidae	Stegomastodon platensis	Tagua Tagua (Ch)	SGO.PV.668	Dp2?	34°27′31′′S; 71°6′43′′W	-34.4586	-71.1121	200	-14.25	-8.49	13,805-14,524	Pérez-Crespo, Víctor Adrián, José Luis Prado, María Teresa Alberdi, Joaquín Arroyo-Cabrales, and Eileen Johnson. “Feeding Ecology of the Gomphotheres (Proboscidea, Gomphotheriidae) of America.” Quaternary Science Reviews 229, no. 106126 (February 1, 2020): 106126. https://doi.org/10.1016/j.quascirev.2019.106126.	González-Guarda, Erwin, Alia Petermann-Pichincura, Carlos Tornero, Laura Domingo, Jordi Agustí, Mario Pino, Ana M. Abarzúa, et al. “Multiproxy Evidence for Leaf-Browsing and Closed Habitats in Extinct Proboscideans (Mammalia, Proboscidea) from Central Chile.” Proceedings of the National Academy of Sciences of the United States of America 115, no. 37 (September 11, 2018): 9258–63. https://doi.org/…
Southern Andes	Chile	González-Guarda et al., 2018	González-Guarda et al., 2018	TP-EH	Gomphotheriidae	Stegomastodon platensis	Tagua Tagua (Ch)	SGO.PV.686	Dp2?	34°27′31′′S; 71°6′43′′W	-34.4586	-71.1121	200	-13.43	-6.38	13,805-14,524	Pérez-Crespo, Víctor Adrián, José Luis Prado, María Teresa Alberdi, Joaquín Arroyo-Cabrales, and Eileen Johnson. “Feeding Ecology of the Gomphotheres (Proboscidea, Gomphotheriidae) of America.” Quaternary Science Reviews 229, no. 106126 (February 1, 2020): 106126. https://doi.org/10.1016/j.quascirev.2019.106126.	González-Guarda, Erwin, Alia Petermann-Pichincura, Carlos Tornero, Laura Domingo, Jordi Agustí, Mario Pino, Ana M. Abarzúa, et al. “Multiproxy Evidence for Leaf-Browsing and Closed Habitats in Extinct Proboscideans (Mammalia, Proboscidea) from Central Chile.” Proceedings of the National Academy of Sciences of the United States of America 115, no. 37 (September 11, 2018): 9258–63. https://doi.org/…
Southern Andes	Chile	González-Guarda et al., 2018	González-Guarda et al., 2018	TP-EH	Gomphotheriidae	Stegomastodon platensis	Tagua Tagua (Ch)	SGO.PV.13a	M3	34°27′31′′S; 71°6′43′′W	-34.4586	-71.1121	200	-13.3	-6.07	13,805-14,524	Pérez-Crespo, Víctor Adrián, José Luis Prado, María Teresa Alberdi, Joaquín Arroyo-Cabrales, and Eileen Johnson. “Feeding Ecology of the Gomphotheres (Proboscidea, Gomphotheriidae) of America.” Quaternary Science Reviews 229, no. 106126 (February 1, 2020): 106126. https://doi.org/10.1016/j.quascirev.2019.106126.	González-Guarda, Erwin, Alia Petermann-Pichincura, Carlos Tornero, Laura Domingo, Jordi Agustí, Mario Pino, Ana M. Abarzúa, et al. “Multiproxy Evidence for Leaf-Browsing and Closed Habitats in Extinct Proboscideans (Mammalia, Proboscidea) from Central Chile.” Proceedings of the National Academy of Sciences of the United States of America 115, no. 37 (September 11, 2018): 9258–63. https://doi.org/…
Southern Andes	Chile	González-Guarda et al., 2018	González-Guarda et al., 2018	TP-EH	Gomphotheriidae	Stegomastodon platensis	Tagua Tagua (Ch)	SGO.PV.47j	M3	34°27′31′′S; 71°6′43′′W	-34.4586	-71.1121	200	-12.8	-4.01	13,805-14,524	Pérez-Crespo, Víctor Adrián, José Luis Prado, María Teresa Alberdi, Joaquín Arroyo-Cabrales, and Eileen Johnson. “Feeding Ecology of the Gomphotheres (Proboscidea, Gomphotheriidae) of America.” Quaternary Science Reviews 229, no. 106126 (February 1, 2020): 106126. https://doi.org/10.1016/j.quascirev.2019.106126.	González-Guarda, Erwin, Alia Petermann-Pichincura, Carlos Tornero, Laura Domingo, Jordi Agustí, Mario Pino, Ana M. Abarzúa, et al. “Multiproxy Evidence for Leaf-Browsing and Closed Habitats in Extinct Proboscideans (Mammalia, Proboscidea) from Central Chile.” Proceedings of the National Academy of Sciences of the United States of America 115, no. 37 (September 11, 2018): 9258–63. https://doi.org/…
Southern Andes	Chile	González-Guarda et al., 2018	González-Guarda et al., 2018	TP-EH	Gomphotheriidae	Stegomastodon platensis	Tagua Tagua (Ch)	SGO.PV.1b	M1/m1	34°27′31′′S; 71°6′43′′W	-34.4586	-71.1121	200	-12.66	-4.76	13,805-14,524	Pérez-Crespo, Víctor Adrián, José Luis Prado, María Teresa Alberdi, Joaquín Arroyo-Cabrales, and Eileen Johnson. “Feeding Ecology of the Gomphotheres (Proboscidea, Gomphotheriidae) of America.” Quaternary Science Reviews 229, no. 106126 (February 1, 2020): 106126. https://doi.org/10.1016/j.quascirev.2019.106126.	González-Guarda, Erwin, Alia Petermann-Pichincura, Carlos Tornero, Laura Domingo, Jordi Agustí, Mario Pino, Ana M. Abarzúa, et al. “Multiproxy Evidence for Leaf-Browsing and Closed Habitats in Extinct Proboscideans (Mammalia, Proboscidea) from Central Chile.” Proceedings of the National Academy of Sciences of the United States of America 115, no. 37 (September 11, 2018): 9258–63. https://doi.org/…
Southern Andes	Chile	González-Guarda et al., 2018	González-Guarda et al., 2018	TP-EH	Gomphotheriidae	Stegomastodon platensis	Tagua Tagua (Ch)	SGO.PV.48a	M1/m1	34°27′31′′S; 71°6′43′′W	-34.4586	-71.1121	200	-12.61	-6.95	13,805-14,524	Pérez-Crespo, Víctor Adrián, José Luis Prado, María Teresa Alberdi, Joaquín Arroyo-Cabrales, and Eileen Johnson. “Feeding Ecology of the Gomphotheres (Proboscidea, Gomphotheriidae) of America.” Quaternary Science Reviews 229, no. 106126 (February 1, 2020): 106126. https://doi.org/10.1016/j.quascirev.2019.106126.	González-Guarda, Erwin, Alia Petermann-Pichincura, Carlos Tornero, Laura Domingo, Jordi Agustí, Mario Pino, Ana M. Abarzúa, et al. “Multiproxy Evidence for Leaf-Browsing and Closed Habitats in Extinct Proboscideans (Mammalia, Proboscidea) from Central Chile.” Proceedings of the National Academy of Sciences of the United States of America 115, no. 37 (September 11, 2018): 9258–63. https://doi.org/…
Southern Andes	Chile	González-Guarda et al., 2018	González-Guarda et al., 2018	TP-EH	Gomphotheriidae	Stegomastodon platensis	Tagua Tagua (Ch)	SGO.PV.47a	M3/m3	34°27′31′′S; 71°6′43′′W	-34.4586	-71.1121	200	-12.47	-5.14	13,805-14,524	Pérez-Crespo, Víctor Adrián, José Luis Prado, María Teresa Alberdi, Joaquín Arroyo-Cabrales, and Eileen Johnson. “Feeding Ecology of the Gomphotheres (Proboscidea, Gomphotheriidae) of America.” Quaternary Science Reviews 229, no. 106126 (February 1, 2020): 106126. https://doi.org/10.1016/j.quascirev.2019.106126.	González-Guarda, Erwin, Alia Petermann-Pichincura, Carlos Tornero, Laura Domingo, Jordi Agustí, Mario Pino, Ana M. Abarzúa, et al. “Multiproxy Evidence for Leaf-Browsing and Closed Habitats in Extinct Proboscideans (Mammalia, Proboscidea) from Central Chile.” Proceedings of the National Academy of Sciences of the United States of America 115, no. 37 (September 11, 2018): 9258–63. https://doi.org/…
Southern Andes	Chile	González-Guarda et al., 2018	González-Guarda et al., 2018	TP-EH	Gomphotheriidae	Stegomastodon platensis	Tagua Tagua (Ch)	SGO.PV.13a	M3	34°27′31′′S; 71°6′43′′W	-34.4586	-71.1121	200	-12.41	-2.77	13,805-14,524	Pérez-Crespo, Víctor Adrián, José Luis Prado, María Teresa Alberdi, Joaquín Arroyo-Cabrales, and Eileen Johnson. “Feeding Ecology of the Gomphotheres (Proboscidea, Gomphotheriidae) of America.” Quaternary Science Reviews 229, no. 106126 (February 1, 2020): 106126. https://doi.org/10.1016/j.quascirev.2019.106126.	González-Guarda, Erwin, Alia Petermann-Pichincura, Carlos Tornero, Laura Domingo, Jordi Agustí, Mario Pino, Ana M. Abarzúa, et al. “Multiproxy Evidence for Leaf-Browsing and Closed Habitats in Extinct Proboscideans (Mammalia, Proboscidea) from Central Chile.” Proceedings of the National Academy of Sciences of the United States of America 115, no. 37 (September 11, 2018): 9258–63. https://doi.org/…
Southern Andes	Chile	González-Guarda et al., 2018	González-Guarda et al., 2018	TP-EH	Gomphotheriidae	Stegomastodon platensis	Tagua Tagua (Ch)	SGO.PV.47k	M2/m2	34°27′31′′S; 71°6′43′′W	-34.4586	-71.1121	200	-11.97	-4.63	12,260 ± 80	Pérez-Crespo, Víctor Adrián, José Luis Prado, María Teresa Alberdi, Joaquín Arroyo-Cabrales, and Eileen Johnson. “Feeding Ecology of the Gomphotheres (Proboscidea, Gomphotheriidae) of America.” Quaternary Science Reviews 229, no. 106126 (February 1, 2020): 106126. https://doi.org/10.1016/j.quascirev.2019.106126.	González-Guarda, Erwin, Alia Petermann-Pichincura, Carlos Tornero, Laura Domingo, Jordi Agustí, Mario Pino, Ana M. Abarzúa, et al. “Multiproxy Evidence for Leaf-Browsing and Closed Habitats in Extinct Proboscideans (Mammalia, Proboscidea) from Central Chile.” Proceedings of the National Academy of Sciences of the United States of America 115, no. 37 (September 11, 2018): 9258–63. https://doi.org/…
Southern Andes	Chile	González-Guarda et al., 2018	González-Guarda et al., 2018	TP-EH	Gomphotheriidae	Stegomastodon platensis	Tagua Tagua (Ch)	SGO.PV.47f	M3/m3	34°27′31′′S; 71°6′43′′W	-34.4586	-71.1121	200	-11.79	-4.4	13,805-14,524	Pérez-Crespo, Víctor Adrián, José Luis Prado, María Teresa Alberdi, Joaquín Arroyo-Cabrales, and Eileen Johnson. “Feeding Ecology of the Gomphotheres (Proboscidea, Gomphotheriidae) of America.” Quaternary Science Reviews 229, no. 106126 (February 1, 2020): 106126. https://doi.org/10.1016/j.quascirev.2019.106126.	González-Guarda, Erwin, Alia Petermann-Pichincura, Carlos Tornero, Laura Domingo, Jordi Agustí, Mario Pino, Ana M. Abarzúa, et al. “Multiproxy Evidence for Leaf-Browsing and Closed Habitats in Extinct Proboscideans (Mammalia, Proboscidea) from Central Chile.” Proceedings of the National Academy of Sciences of the United States of America 115, no. 37 (September 11, 2018): 9258–63. https://doi.org/…
Southern Andes	Chile	González-Guarda et al., 2018	González-Guarda et al., 2018	TP-EH	Gomphotheriidae	Stegomastodon platensis	Tagua Tagua (Ch)	SGO.PV.TT2A	M2/m2	34°27′31′′S; 71°6′43′′W	-34.4586	-71.1121	200	-11.71	-3.46	13,805-14,524	Pérez-Crespo, Víctor Adrián, José Luis Prado, María Teresa Alberdi, Joaquín Arroyo-Cabrales, and Eileen Johnson. “Feeding Ecology of the Gomphotheres (Proboscidea, Gomphotheriidae) of America.” Quaternary Science Reviews 229, no. 106126 (February 1, 2020): 106126. https://doi.org/10.1016/j.quascirev.2019.106126.	González-Guarda, Erwin, Alia Petermann-Pichincura, Carlos Tornero, Laura Domingo, Jordi Agustí, Mario Pino, Ana M. Abarzúa, et al. “Multiproxy Evidence for Leaf-Browsing and Closed Habitats in Extinct Proboscideans (Mammalia, Proboscidea) from Central Chile.” Proceedings of the National Academy of Sciences of the United States of America 115, no. 37 (September 11, 2018): 9258–63. https://doi.org/…
Southern Andes	Chile	González-Guarda et al., 2018	González-Guarda et al., 2018	TP-EH	Gomphotheriidae	Stegomastodon platensis	Tagua Tagua (Ch)	SGO.PV.46a	m3	34°27′31′′S; 71°6′43′′W	-34.4586	-71.1121	200	-11.68	-4.97	13,805-14,524	Pérez-Crespo, Víctor Adrián, José Luis Prado, María Teresa Alberdi, Joaquín Arroyo-Cabrales, and Eileen Johnson. “Feeding Ecology of the Gomphotheres (Proboscidea, Gomphotheriidae) of America.” Quaternary Science Reviews 229, no. 106126 (February 1, 2020): 106126. https://doi.org/10.1016/j.quascirev.2019.106126.	González-Guarda, Erwin, Alia Petermann-Pichincura, Carlos Tornero, Laura Domingo, Jordi Agustí, Mario Pino, Ana M. Abarzúa, et al. “Multiproxy Evidence for Leaf-Browsing and Closed Habitats in Extinct Proboscideans (Mammalia, Proboscidea) from Central Chile.” Proceedings of the National Academy of Sciences of the United States of America 115, no. 37 (September 11, 2018): 9258–63. https://doi.org/…
Southern Andes	Chile	González-Guarda et al., 2018	González-Guarda et al., 2018	TP-EH	Gomphotheriidae	Stegomastodon platensis	Tagua Tagua (Ch)	SGO.PV.1d	M2/m2	34°27′31′′S; 71°6′43′′W	-34.4586	-71.1121	200	-11.68	-3.68	13,805-14,524	Pérez-Crespo, Víctor Adrián, José Luis Prado, María Teresa Alberdi, Joaquín Arroyo-Cabrales, and Eileen Johnson. “Feeding Ecology of the Gomphotheres (Proboscidea, Gomphotheriidae) of America.” Quaternary Science Reviews 229, no. 106126 (February 1, 2020): 106126. https://doi.org/10.1016/j.quascirev.2019.106126.	González-Guarda, Erwin, Alia Petermann-Pichincura, Carlos Tornero, Laura Domingo, Jordi Agustí, Mario Pino, Ana M. Abarzúa, et al. “Multiproxy Evidence for Leaf-Browsing and Closed Habitats in Extinct Proboscideans (Mammalia, Proboscidea) from Central Chile.” Proceedings of the National Academy of Sciences of the United States of America 115, no. 37 (September 11, 2018): 9258–63. https://doi.org/…
Southern Andes	Chile	González-Guarda et al., 2018	González-Guarda et al., 2018	TP-EH	Gomphotheriidae	Stegomastodon platensis	Tagua Tagua (Ch)	SGO.PV.47a	M3	34°27′31′′S; 71°6′43′′W	-34.4586	-71.1121	200	-11.6	-3.92	13,805-14,524	Pérez-Crespo, Víctor Adrián, José Luis Prado, María Teresa Alberdi, Joaquín Arroyo-Cabrales, and Eileen Johnson. “Feeding Ecology of the Gomphotheres (Proboscidea, Gomphotheriidae) of America.” Quaternary Science Reviews 229, no. 106126 (February 1, 2020): 106126. https://doi.org/10.1016/j.quascirev.2019.106126.	González-Guarda, Erwin, Alia Petermann-Pichincura, Carlos Tornero, Laura Domingo, Jordi Agustí, Mario Pino, Ana M. Abarzúa, et al. “Multiproxy Evidence for Leaf-Browsing and Closed Habitats in Extinct Proboscideans (Mammalia, Proboscidea) from Central Chile.” Proceedings of the National Academy of Sciences of the United States of America 115, no. 37 (September 11, 2018): 9258–63. https://doi.org/…
Southern Andes	Chile	González-Guarda et al., 2018	González-Guarda et al., 2018	TP-EH	Gomphotheriidae	Stegomastodon platensis	Tagua Tagua (Ch)	SGO.PV.256	M3/m3	34°27′31′′S; 71°6′43′′W	-34.4586	-71.1121	200	-11.55	-3.44	11,750 ± 60	Pérez-Crespo, Víctor Adrián, José Luis Prado, María Teresa Alberdi, Joaquín Arroyo-Cabrales, and Eileen Johnson. “Feeding Ecology of the Gomphotheres (Proboscidea, Gomphotheriidae) of America.” Quaternary Science Reviews 229, no. 106126 (February 1, 2020): 106126. https://doi.org/10.1016/j.quascirev.2019.106126.	González-Guarda, Erwin, Alia Petermann-Pichincura, Carlos Tornero, Laura Domingo, Jordi Agustí, Mario Pino, Ana M. Abarzúa, et al. “Multiproxy Evidence for Leaf-Browsing and Closed Habitats in Extinct Proboscideans (Mammalia, Proboscidea) from Central Chile.” Proceedings of the National Academy of Sciences of the United States of America 115, no. 37 (September 11, 2018): 9258–63. https://doi.org/…
Southern Andes	Chile	González-Guarda et al., 2018	González-Guarda et al., 2018	TP-EH	Gomphotheriidae	Stegomastodon platensis	Tagua Tagua (Ch)	SGO.PV.60	Dp2?	34°27′31′′S; 71°6′43′′W	-34.4586	-71.1121	200	-11.54	-5.08	13,805-14,524	Pérez-Crespo, Víctor Adrián, José Luis Prado, María Teresa Alberdi, Joaquín Arroyo-Cabrales, and Eileen Johnson. “Feeding Ecology of the Gomphotheres (Proboscidea, Gomphotheriidae) of America.” Quaternary Science Reviews 229, no. 106126 (February 1, 2020): 106126. https://doi.org/10.1016/j.quascirev.2019.106126.	González-Guarda, Erwin, Alia Petermann-Pichincura, Carlos Tornero, Laura Domingo, Jordi Agustí, Mario Pino, Ana M. Abarzúa, et al. “Multiproxy Evidence for Leaf-Browsing and Closed Habitats in Extinct Proboscideans (Mammalia, Proboscidea) from Central Chile.” Proceedings of the National Academy of Sciences of the United States of America 115, no. 37 (September 11, 2018): 9258–63. https://doi.org/…
Southern Andes	Chile	González-Guarda et al., 2018	González-Guarda et al., 2018	TP-EH	Gomphotheriidae	Stegomastodon platensis	Tagua Tagua (Ch)	SGO.PV.47c1	M3/m3	34°27′31′′S; 71°6′43′′W	-34.4586	-71.1121	200	-4.07	-2.31	13,805-14,524	Pérez-Crespo, Víctor Adrián, José Luis Prado, María Teresa Alberdi, Joaquín Arroyo-Cabrales, and Eileen Johnson. “Feeding Ecology of the Gomphotheres (Proboscidea, Gomphotheriidae) of America.” Quaternary Science Reviews 229, no. 106126 (February 1, 2020): 106126. https://doi.org/10.1016/j.quascirev.2019.106126.	González-Guarda, Erwin, Alia Petermann-Pichincura, Carlos Tornero, Laura Domingo, Jordi Agustí, Mario Pino, Ana M. Abarzúa, et al. “Multiproxy Evidence for Leaf-Browsing and Closed Habitats in Extinct Proboscideans (Mammalia, Proboscidea) from Central Chile.” Proceedings of the National Academy of Sciences of the United States of America 115, no. 37 (September 11, 2018): 9258–63. https://doi.org/…
Southern Andes	Chile	Doming et al., 2012	Doming et al., 2012	TP-EH	Gomphotheriidae	Stegomastodon platensis	Tagua-tagua (Ch)	SGD.PV.13a	Enamel	34°27′31′′S; 71°6′43′′W	-34.4586	-71.1121	216	-13.3	-6.07	11,0-6,0	Domingo, Laura, José Luis Prado, and María Teresa Alberdi. “The Effect of Paleoecology and Paleobiogeography on Stable Isotopes of Quaternary Mammals from South America.” Quaternary Science Reviews 55 (November 8, 2012): 103–13. https://doi.org/10.1016/j.quascirev.2012.08.017.	González-Guarda, Erwin, Alia Petermann-Pichincura, Carlos Tornero, Laura Domingo, Jordi Agustí, Mario Pino, Ana M. Abarzúa, et al. “Multiproxy Evidence for Leaf-Browsing and Closed Habitats in Extinct Proboscideans (Mammalia, Proboscidea) from Central Chile.” Proceedings of the National Academy of Sciences of the United States of America 115, no. 37 (September 11, 2018): 9258–63. https://doi.org/…
Southern Andes	Chile	Doming et al., 2012	Doming et al., 2012	TP-EH	Gomphotheriidae	Stegomastodon platensis	Tagua-tagua (Ch)	SGD.PV.47c	Enamel	34°27′31′′S; 71°6′43′′W	-34.4586	-71.1121	216	-3.99	-1.83	11,0-6,0	Domingo, Laura, José Luis Prado, and María Teresa Alberdi. “The Effect of Paleoecology and Paleobiogeography on Stable Isotopes of Quaternary Mammals from South America.” Quaternary Science Reviews 55 (November 8, 2012): 103–13. https://doi.org/10.1016/j.quascirev.2012.08.017.	González-Guarda, Erwin, Alia Petermann-Pichincura, Carlos Tornero, Laura Domingo, Jordi Agustí, Mario Pino, Ana M. Abarzúa, et al. “Multiproxy Evidence for Leaf-Browsing and Closed Habitats in Extinct Proboscideans (Mammalia, Proboscidea) from Central Chile.” Proceedings of the National Academy of Sciences of the United States of America 115, no. 37 (September 11, 2018): 9258–63. https://doi.org/…
Southern Andes	Chile	Sánchez et al., 2004		TP-EH	Gomphotheriidae	C. hyodon (late Pl)	Tagua-tagua (Ch)	SGO PV 47j	Enamel	34°27′31′′S; 71°6′43′′W	-34.4586	-71.1121	200	-12.8	-4.01	Late Pleistocene	Sánchez, Begoña, José Luis Prado, and María Teresa Alberdi. 2004. “Feeding Ecology, Dispersal, and Extinction of South American Pleistocene Gomphotheres (Gomphotheriidae, Proboscidea).” Paleobiology 30 (1): 146–61.	González-Guarda, Erwin, Alia Petermann-Pichincura, Carlos Tornero, Laura Domingo, Jordi Agustí, Mario Pino, Ana M. Abarzúa, et al. “Multiproxy Evidence for Leaf-Browsing and Closed Habitats in Extinct Proboscideans (Mammalia, Proboscidea) from Central Chile.” Proceedings of the National Academy of Sciences of the United States of America 115, no. 37 (September 11, 2018): 9258–63. https://doi.org/…
Southern Andes	Chile	Sánchez et al., 2004		TP-EH	Gomphotheriidae	C. hyodon (late Pl)	Tagua-tagua (Ch)	SGO PV 47a	Enamel	34°27′31′′S; 71°6′43′′W	-34.4586	-71.1121	200	-11.6	-3.92	Late Pleistocene	Sánchez, Begoña, José Luis Prado, and María Teresa Alberdi. 2004. “Feeding Ecology, Dispersal, and Extinction of South American Pleistocene Gomphotheres (Gomphotheriidae, Proboscidea).” Paleobiology 30 (1): 146–61.	González-Guarda, Erwin, Alia Petermann-Pichincura, Carlos Tornero, Laura Domingo, Jordi Agustí, Mario Pino, Ana M. Abarzúa, et al. “Multiproxy Evidence for Leaf-Browsing and Closed Habitats in Extinct Proboscideans (Mammalia, Proboscidea) from Central Chile.” Proceedings of the National Academy of Sciences of the United States of America 115, no. 37 (September 11, 2018): 9258–63. https://doi.org/…
Southern Andes	Chile	Doming et al., 2012	Sánchez et al. (2004)	TP-EH	Gomphotheriidae	Cuvieronious hyodon	Tagua-tagua (Ch)	SGO.PV.47j	Enamel	34°27′31′′S; 71°6′43′′W	-34.4586	-71.1121	200	-12.8	-4.01	Late Pelistocene	Domingo, Laura, José Luis Prado, and María Teresa Alberdi. “The Effect of Paleoecology and Paleobiogeography on Stable Isotopes of Quaternary Mammals from South America.” Quaternary Science Reviews 55 (November 8, 2012): 103–13. https://doi.org/10.1016/j.quascirev.2012.08.017.	González-Guarda, Erwin, Alia Petermann-Pichincura, Carlos Tornero, Laura Domingo, Jordi Agustí, Mario Pino, Ana M. Abarzúa, et al. “Multiproxy Evidence for Leaf-Browsing and Closed Habitats in Extinct Proboscideans (Mammalia, Proboscidea) from Central Chile.” Proceedings of the National Academy of Sciences of the United States of America 115, no. 37 (September 11, 2018): 9258–63. https://doi.org/…
Southern Andes	Chile	Doming et al., 2012	Sánchez et al. (2004)	TP-EH	Gomphotheriidae	Cuvieronious hyodon	Tagua-tagua (Ch)	SGO.PV.47a	Enamel	34°27′31′′S; 71°6′43′′W	-34.4586	-71.1121	200	-11.6	-3.92	Late Pelistocene	Domingo, Laura, José Luis Prado, and María Teresa Alberdi. “The Effect of Paleoecology and Paleobiogeography on Stable Isotopes of Quaternary Mammals from South America.” Quaternary Science Reviews 55 (November 8, 2012): 103–13. https://doi.org/10.1016/j.quascirev.2012.08.017.	González-Guarda, Erwin, Alia Petermann-Pichincura, Carlos Tornero, Laura Domingo, Jordi Agustí, Mario Pino, Ana M. Abarzúa, et al. “Multiproxy Evidence for Leaf-Browsing and Closed Habitats in Extinct Proboscideans (Mammalia, Proboscidea) from Central Chile.” Proceedings of the National Academy of Sciences of the United States of America 115, no. 37 (September 11, 2018): 9258–63. https://doi.org/…
Southern Andes	Chile	Perez-Crespo et al. 2020	Domingo et al., (2012)	LP	Gomphotheriidae	Stegomastodon platensis	Tierras Blancas (Ch)	SGO.PV.8	M2	32°58′45′′S; 71°12′37′′W	-32.9793	-71.2102	703	-14.8	-6.92	late Pleistocene	Pérez-Crespo, Víctor Adrián, José Luis Prado, María Teresa Alberdi, Joaquín Arroyo-Cabrales, and Eileen Johnson. “Feeding Ecology of the Gomphotheres (Proboscidea, Gomphotheriidae) of America.” Quaternary Science Reviews 229, no. 106126 (February 1, 2020): 106126. https://doi.org/10.1016/j.quascirev.2019.106126.	González-Guarda, Erwin, Alia Petermann-Pichincura, Carlos Tornero, Laura Domingo, Jordi Agustí, Mario Pino, Ana M. Abarzúa, et al. “Multiproxy Evidence for Leaf-Browsing and Closed Habitats in Extinct Proboscideans (Mammalia, Proboscidea) from Central Chile.” Proceedings of the National Academy of Sciences of the United States of America 115, no. 37 (September 11, 2018): 9258–63. https://doi.org/…
Southern Andes	Chile	Perez-Crespo et al. 2020	Domingo et al., (2012)	LP	Gomphotheriidae	Stegomastodon platensis	Tierras Blancas (Ch)	SGO.PV.235	M3	32°58′45′′S; 71°12′37′′W	-32.9793	-71.2102	300	-12.1	-2.81	late Pleistocene	Pérez-Crespo, Víctor Adrián, José Luis Prado, María Teresa Alberdi, Joaquín Arroyo-Cabrales, and Eileen Johnson. “Feeding Ecology of the Gomphotheres (Proboscidea, Gomphotheriidae) of America.” Quaternary Science Reviews 229, no. 106126 (February 1, 2020): 106126. https://doi.org/10.1016/j.quascirev.2019.106126.	González-Guarda, Erwin, Alia Petermann-Pichincura, Carlos Tornero, Laura Domingo, Jordi Agustí, Mario Pino, Ana M. Abarzúa, et al. “Multiproxy Evidence for Leaf-Browsing and Closed Habitats in Extinct Proboscideans (Mammalia, Proboscidea) from Central Chile.” Proceedings of the National Academy of Sciences of the United States of America 115, no. 37 (September 11, 2018): 9258–63. https://doi.org/…
Southern Andes	Chile	Sánchez et al., 2004		LP	Gomphotheriidae	C. hyodon (late Pl)	Tierras Blancas (Ch)	SGO PV 235	Enamel	32°58′45′′S; 71°12′37′′W	-32.9793	-71.2102	300	-12.1	-2.81	Late Pleistocene	Sánchez, Begoña, José Luis Prado, and María Teresa Alberdi. 2004. “Feeding Ecology, Dispersal, and Extinction of South American Pleistocene Gomphotheres (Gomphotheriidae, Proboscidea).” Paleobiology 30 (1): 146–61.	González-Guarda, Erwin, Alia Petermann-Pichincura, Carlos Tornero, Laura Domingo, Jordi Agustí, Mario Pino, Ana M. Abarzúa, et al. “Multiproxy Evidence for Leaf-Browsing and Closed Habitats in Extinct Proboscideans (Mammalia, Proboscidea) from Central Chile.” Proceedings of the National Academy of Sciences of the United States of America 115, no. 37 (September 11, 2018): 9258–63. https://doi.org/…
Southern Andes	Chile	Doming et al., 2012	Doming et al., 2012	LP	Gomphotheriidae	Stegomastodon platensis	Tierras Blancas (Ch)	SGD.PV.8	Enamel	32°58′45′′S; 71°12′37′′W	-32.9793	-71.2102	703	-14.8	-6.93	Late Pelistocene	Domingo, Laura, José Luis Prado, and María Teresa Alberdi. “The Effect of Paleoecology and Paleobiogeography on Stable Isotopes of Quaternary Mammals from South America.” Quaternary Science Reviews 55 (November 8, 2012): 103–13. https://doi.org/10.1016/j.quascirev.2012.08.017.	González-Guarda, Erwin, Alia Petermann-Pichincura, Carlos Tornero, Laura Domingo, Jordi Agustí, Mario Pino, Ana M. Abarzúa, et al. “Multiproxy Evidence for Leaf-Browsing and Closed Habitats in Extinct Proboscideans (Mammalia, Proboscidea) from Central Chile.” Proceedings of the National Academy of Sciences of the United States of America 115, no. 37 (September 11, 2018): 9258–63. https://doi.org/…
Southern Andes	Chile	Perez-Crespo et al. 2020	Sánchez et al. (2004) / González-Guarda et al., 2017; 2018	TP-EH	Gomphotheriidae	Cuvieronious hyodon / Stegomastodon platensis	Tramalhué (Ch) /San Pablo	SGO.PV.43	M3	40°8′25′′S; 73°27′34′′W	-40.1405	-73.4594	100	-13.9	-3.92	13,064–13,317	Pérez-Crespo, Víctor Adrián, José Luis Prado, María Teresa Alberdi, Joaquín Arroyo-Cabrales, and Eileen Johnson. “Feeding Ecology of the Gomphotheres (Proboscidea, Gomphotheriidae) of America.” Quaternary Science Reviews 229, no. 106126 (February 1, 2020): 106126. https://doi.org/10.1016/j.quascirev.2019.106126.	Frassinetti, D., and M. T. Alberdi. “Revisión y estudio de los restos fósiles de mastodontes de Chile (Gomphotheriidae): Cuvieronius hyodon, Pleistoceno superior.” Estudios geológicos 56, no. 3–4 (August 30, 2000): 197–208. https://doi.org/10.3989/egeol.00563-4151.
Southern Andes	Chile	López et al., 2018		LP	Equus	Equus (Amerhippus) sp.	GNL Quintero 1	UGAMS 15535	Enamel	32°46′ S; 71°30′ W	-32.7667	-71.5	0	-12.3	-3	27,159–26,679 cal BP	López Mendoza, P., Cartajena, I., Carabias, D., Prevosti, F.J., Maldonado, A., and Flores-Aqueveque, V. (2018). Reconstructing drowned terrestrial landscapes. Isotopic paleoecology of a late Pleistocene extinct faunal assemblage: Site GNL Quintero 1 (GNLQ1) (32° S, Central Chile). Quat. Int. 463, 153–160. https://doi.org/10.1016/j.quaint.2016.08.017.
Southern Andes	Chile	López et al., 2018		LP	Equus	Equus (Amerhippus) sp.	GNL Quintero 1	UGAMS 20847	Enamel	32°46′ S; 71°30′ W	-32.7667	-71.5	0	-12.3	-3.5	27,159–26,679 cal BP	López Mendoza, P., Cartajena, I., Carabias, D., Prevosti, F.J., Maldonado, A., and Flores-Aqueveque, V. (2018). Reconstructing drowned terrestrial landscapes. Isotopic paleoecology of a late Pleistocene extinct faunal assemblage: Site GNL Quintero 1 (GNLQ1) (32° S, Central Chile). Quat. Int. 463, 153–160. https://doi.org/10.1016/j.quaint.2016.08.017.

## Sheet: SI_Table3
Site Focus	Taxanomic Focus	Stable Isotope	Shapiro	Normality	ANOVA P Value	Kruskal–Wallis	Rank-based Generalized Linear Model (GLM)	Ttest	Mann–Whitney	Significant Difference	Interpretation	R Code	Results (Shapiro)	Results (ANOVA or Kruskal–Wallis, Ttest or Wilcox or Mann–Whitney)	Pairwise
Colombia (All)	Gomph vs. Equus	d13C enamel (bulk)	0.01042	Not Normal					0.9039	No	Results from Shapiro indicate that carbon values of Megafauna (Gomph vs. Equus) from Colombian Pleistocene sites are not normally distributed (p < 0.05). From Mann-Whitney, with a p value > 0.05 we fail to reject the null hypothesis that there is no signicant difference between the Megafauna (Gomph vs. Equus) from Colombian Pleistocene sites.	shapiro.test(One_Col_Stats$C13VPDB); wilcox.test(C13VPDB ~Taxa, One_Col_Stats);	Shapiro-Wilk normality test data: One_Col_Stats$C13VPDB W = 0.8616, p-value = 0.01042	Wilcoxon rank sum exact test data: C13VPDB by Taxa W = 46, p-value = 0.9039 alternative hypothesis: true location shift is not equal to 0
Colombia (All)	Gomph vs. Equus	d18O enamel (bulk)	0.4153	Normal				0.2898		No	Results from Shapiro indicate that carbon values of Megafauna (Gomph vs. Equus) from Colombian Pleistocene sites are normally distributed (p > 0.05). From TTest, with a p value > 0.05 we fail reject the null hypothesis that there is no signicant difference between the Megafauna (Gomph vs. Equus) from Colombian Pleistocene sites.	shapiro.test(One_Col_Stats$O18VPDB) wilcox.test(O18VPDB ~Taxa, One_Col_Stats)	Shapiro-Wilk normality test data: One_Col_Stats$O18VPDB W = 0.95127, p-value = 0.4153	Welch Two Sample t-test data: O18VPDB by Taxa t = 1.1269, df = 8.7355, p-value = 0.2898 alternative hypothesis: true difference in means between group Equus and group Gomphotheriidae is not equal to 0 95 percent confidence interval: -1.854411 5.502219 sample estimates: mean in group Equus mean in group Gomphotheriidae -5.216047 -7.039951
Colombia (Tibito)	Gomph vs. Equus	d13C enamel (bulk)	0.5682	Normal				0.917		No	Results from Shapiro indicate that carbon values of Megafauna (Gomph vs. Equus) from the Tibito paleaeontological site are normally distributed (p > 0.05). From TTest, with a p value > 0.05 we fail reject the null hypothesis that there is no signicant difference between the Megafauna (Gomph vs. Equus) from the Tibito paleaeontological site.	shapiro.test(Two_Tib_Stats$C13VPDB) t.test(C13VPDB ~Taxa, Two_Tib_Stats)	Shapiro-Wilk normality test data: Two_Tib_Stats$C13VPDB W = 0.94397, p-value = 0.5682	Welch Two Sample t-test data: C13VPDB by Taxa t = 0.10802, df = 6.9906, p-value = 0.917 alternative hypothesis: true difference in means between group Equus and group Gomphotheriidae is not equal to 0 95 percent confidence interval: -2.786222 3.052889 sample estimates: mean in group Equus mean in group Gomphotheriidae -10.73667 -10.87000
Colombia (Tibito)	Gomph vs. Equus	d18O enamel (bulk)	0.6765	Normal				0.936		No	Results from Shapiro indicate that carbon values of Megafauna (Gomph vs. Equus) from the Tibito paleaeontological site are normally distributed (p > 0.05). From TTest, with a p value > 0.05 we fail reject the null hypothesis that there is no signicant difference between the Megafauna (Gomph vs. Equus) from the Tibito paleaeontological site.	shapiro.test(Two_Tib_Stats$O18VPDB) t.test(O18VPDB ~Taxa, Two_Tib_Stats)	Shapiro-Wilk normality test data: Two_Tib_Stats$O18VPDB W = 0.95254, p-value = 0.6765	Welch Two Sample t-test data: O18VPDB by Taxa t = -0.08284, df = 8.0645, p-value = 0.936 alternative hypothesis: true difference in means between group Equus and group Gomphotheriidae is not equal to 0 95 percent confidence interval: -3.570955 3.322955 sample estimates: mean in group Equus mean in group Gomphotheriidae -7.030 -6.906
Colombia (All)	Equus (2 Groups/Time Ranges)	d13C enamel (bulk)	0.0791	Normal				0.003337		Yes	Results from Shapiro indicate that carbon values of Megafauna (Equus) from the Colombia paleaeontological site are normally distributed (p > 0.05). From TTest, with a p value < 0.05 we reject the null hypothesis that there is no signicant difference between Equus Carbon values from Colombia during the LP-EH transition.	shapiro.test(TimeEquus$C13VPDB) t.test(C13VPDB ~Age, TimeEquus)	Shapiro-Wilk normality test data: TimeEquus$C13VPDB W = 0.84207, p-value = 0.0791	Welch Two Sample t-test data: C13VPDB by Age t = 9.2726, df = 2.8323, p-value = 0.003337 alternative hypothesis: true difference in means between group Late Pleistocene and group Late Pleistocene-Holocene is not equal to 0 95 percent confidence interval: 5.989917 12.583417 sample estimates: mean in group Late Pleistocene mean in group Late Pleistocene-Holocene -1.45000 -10.73667
Colombia (All)	Equus (2 Groups/Time Ranges)	d18O enamel (bulk)	0.9593	Normal				0.01844		Yes	Results from Shapiro indicate that oxygen values of Megafauna (Equus) from the Colombia paleaeontological site are normally distributed (p > 0.05). From TTest, with a p value < 0.05 we reject the null hypothesis that there is no signicant difference between Equus Oxygen values from Colombia during the LP-EH transition.	shapiro.test(TimeEquus$O18VPDB) t.test(O18VPDB ~Age, TimeEquus)	Shapiro-Wilk normality test data: TimeEquus$O18VPDB W = 0.97928, p-value = 0.9593	Welch Two Sample t-test data: O18VPDB by Age t = 4.1249, df = 3.5605, p-value = 0.01844 alternative hypothesis: true difference in means between group Late Pleistocene and group Late Pleistocene-Holocene is not equal to 0 95 percent confidence interval: 2.124784 12.386839 sample estimates: mean in group Late Pleistocene mean in group Late Pleistocene-Holocene 0.2258115 -7.0300000
Colombia (All)	Gomp (2 Groups/Time Ranges)	d13C enamel (bulk)	0.07469	Normal				0.7364		No	Results from Shapiro indicate that carbon values of Megafauna (Gomp) from the Colombia paleaeontological site are normally distributed (p > 0.05). From TTest, with a p value > 0.05 we fail to reject the null hypothesis that there is no signicant difference between Gomp Carbon values from Colombia during the LP-EH transition.	shapiro.test(TimeGomp$C13VPDB) t.test(C13VPDB ~Age, TimeGomp)	Shapiro-Wilk normality test data: TimeGomp$C13VPDB W = 0.86874, p-value = 0.07469	Welch Two Sample t-test data: C13VPDB by Age t = 0.36533, df = 3.4124, p-value = 0.7364 alternative hypothesis: true difference in means between group Late Pleistocene and group Late Pleistocene-Holocene is not equal to 0 95 percent confidence interval: -7.617598 9.749967 sample estimates: mean in group Late Pleistocene mean in group Late Pleistocene-Holocene -7.628732 -8.694917
Colombia (All)	Gomp (2 Groups/Time Ranges)	d18O enamel (bulk)	0.08022	Normal				0.7071		No	Results from Shapiro indicate that oxygen values of Megafauna (Gomp) from the Colombia paleaeontological site are normally distributed (p > 0.05). From TTest, with a p value > 0.05 we fail to reject the null hypothesis that there is no signicant difference between Gomp oxygen values from Colombia during the LP-EH transition.	shapiro.test(TimeGomp$O18VPDB) t.test(O18VPDB ~Age, TimeGomp)	Shapiro-Wilk normality test data: TimeGomp$O18VPDB W = 0.87116, p-value = 0.08022	Welch Two Sample t-test data: O18VPDB by Age t = -0.42188, df = 2.4707, p-value = 0.7071 alternative hypothesis: true difference in means between group Late Pleistocene and group Late Pleistocene-Holocene is not equal to 0 95 percent confidence interval: -6.675997 5.277221 sample estimates: mean in group Late Pleistocene mean in group Late Pleistocene-Holocene -7.548597 -6.849209
South America (All)	Gomph (3 Groups/Regions)	d13C enamel (bulk)	7.037e-08	Not Normal		8.489e-12				Yes	Results from Shapiro indicate that carbon values of Gomphotheridae from the Pleistocene-Holocene sites inSouth America are not normally distributed (p < 0.05). As the p-value is less than the significance level 0.05, we can conclude that there are significant differences between the regional groups (North Andes, Pampas/BIR, and South Andes). The pairwise comparison shows that, only Pampas/BIR and…	shapiro.test(AllGomp$C13VPDB) kruskal.test(C13VPDB ~Region, AllGomp) pairwise.wilcox.test(AllGomp$C13VPDB, AllGomp$Region, p.adjust.method = "BH")	Shapiro-Wilk normality test data: AllGomp$C13VPDB W = 0.93763, p-value = 7.037e-08	Kruskal-Wallis rank sum test data: C13VPDB by Region Kruskal-Wallis chi-squared = 50.984, df = 2, p-value = 8.489e-12	Pairwise comparisons using Wilcoxon rank sum test with continuity correction data: AllGomp$C13VPDB and AllGomp$Region Northern Andes Pampas/BIR Pampas/BIR 0.059 - Southern Andes 3.1e-05 5.6e-10 P value adjustment method: BH
South America (All)	Gomph (3 Groups/Regions)	d18O enamel (bulk)	0.002395	Not Normal		2.646e-06				Yes	Results from Shapiro indicate that oxygen values of Gomphotheridae from the Pleistocene-Holocene sites inSouth America are not normally distributed (p < 0.05). As the p-value is less than the significance level 0.05, we can conclude that there are significant differences between the regional groups (North Andes, Pampas/BIR, and South Andes). The pairwise comparison shows that, all three Northern …	shapiro.test(AllGomp$O18VPDB) kruskal.test(O18VPDB ~Region, AllGomp) pairwise.wilcox.test(AllGomp$O18VPDB, AllGomp$Region, p.adjust.method = "BH")	Shapiro-Wilk normality test data: AllGomp$O18VPDB W = 0.97768, p-value = 0.002395	Kruskal-Wallis rank sum test data: O18VPDB by Region Kruskal-Wallis chi-squared = 25.685, df = 2, p-value = 2.646e-06	Pairwise comparisons using Wilcoxon rank sum test with continuity correction data: AllGomp$O18VPDB and AllGomp$Region Northern Andes Pampas/BIR Pampas/BIR 0.00053 - Southern Andes 3.7e-06 0.09329 P value adjustment method: BH
South America (All)	Equus (3 Groups/Regions)	d13C enamel (bulk)	7.126e-05	Not Normal		1.377e-05				Yes	Results from Shapiro indicate that carbon values of Equus from the Pleistocene-Holocene sites in South America are not normally distributed (p < 0.05). As the p-value is less than the significance level 0.05, we can conclude that there are significant differences between the regional groups (North Andes, Pampas/BIR, and South Andes). The pairwise comparison shows that, only Pampas/BIR and Sothern…	shapiro.test(AllEquus$C13VPDB) kruskal.test(C13VPDB ~Region, AllEquus) pairwise.wilcox.test(AllEquus$C13VPDB, AllEquus$Region, p.adjust.method = "BH")	Shapiro-Wilk normality test data: AllEquus$C13VPDB W = 0.91827, p-value = 7.126e-05	Kruskal-Wallis rank sum test data: C13VPDB by Region Kruskal-Wallis chi-squared = 22.385, df = 2, p-value = 1.377e-05	Pairwise comparisons using Wilcoxon rank sum test with continuity correction data: AllEquus$C13VPDB and AllEquus$Region Northern Andes Pampas/BIR Pampas/BIR 0.755 - Southern Andes 0.011 1.2e-05 P value adjustment method: BH
South America (All)	Equus (3 Groups/Regions)	d18O enamel (bulk)	0.004668	Not Normal		0.01274				Yes	Results from Shapiro indicate that carbon values of Gomphotheridae from the Pleistocene-Holocene sites in South America are not normally distributed (p < 0.05). As the p-value is less than the significance level 0.05, we can conclude that there are significant differences between the regional groups (North Andes, Pampas/BIR, and South Andes). The pairwise comparison shows that only the comparison…	shapiro.test(AllEquus$O18VPDB) kruskal.test(O18VPDB ~Region, AllEquus) pairwise.wilcox.test(AllEquus$O18VPDB, AllEquus$Region, p.adjust.method = "BH")	Shapiro-Wilk normality test data: AllEquus$O18VPDB W = 0.95007, p-value = 0.004668	Kruskal-Wallis rank sum test data: O18VPDB by Region Kruskal-Wallis chi-squared = 8.7253, df = 2, p-value = 0.01274	Pairwise comparisons using Wilcoxon rank sum test with continuity correction data: AllEquus$O18VPDB and AllEquus$Region Northern Andes Pampas/BIR Pampas/BIR 0.4991 - Southern Andes 0.6265 0.0036 P value adjustment method: BH
Tibito	Equus vs. Gomphothere Seasonal Amplitude (Range)	C13	0.134	Normal				0.3581		No	Results from Shapiro indicate that carbon values of Megafauna (Gomph vs. Equus) from Colombian Tibito sites are normally distributed (p > 0.05). From TTest, with a p value > 0.05 we fail reject the null hypothesis that there is no signicant difference between the Megafauna (Gomph vs. Equus) from Colombian Pleistocene sites.	shapiro.test(Szn.Amp$C13_Amp); t.test(C13_Amp ~Taxa, Szn.Amp)	Shapiro-Wilk normality test data: Szn.Amp$C13_Amp W = 0.87348, p-value = 0.134	Welch Two Sample t-test data: C13_Amp by Taxa t = -0.99076, df = 6.3352, p-value = 0.3581 alternative hypothesis: true difference in means between group Equus and group Gomph is not equal to 0 95 percent confidence interval: -3.575933 1.495933 sample estimates: mean in group Equus mean in group Gomph 2.30 3.34
Tibito	Equus vs. Gomphothere Seasonal Amplitude (Range)	O18	0.5361	Normal				0.2223		No	Results from Shapiro indicate that oxygen values of Megafauna (Gomph vs. Equus) from Colombian Tibito sites are normally distributed (p > 0.05). From TTest, with a p value > 0.05 we fail reject the null hypothesis that there is no signicant difference between the Megafauna (Gomph vs. Equus) from Colombian Pleistocene sites.	shapiro.test(Szn.Amp$O18_Amp); t.test(O18_Amp ~Taxa, Szn.Amp)	Shapiro-Wilk normality test data: Szn.Amp$O18_Amp W = 0.93557, p-value = 0.5361	Welch Two Sample t-test data: O18_Amp by Taxa t = -1.4547, df = 3.8408, p-value = 0.2223 alternative hypothesis: true difference in means between group Equus and group Gomph is not equal to 0 95 percent confidence interval: -5.736334 1.834334 sample estimates: mean in group Equus mean in group Gomph 2.444 4.395
Tibito (w/o TBT-10)	Equus vs. Gomphothere Seasonal Amplitude (Range)	C13	0.162	Normal				0.05304		No	Results from Shapiro indicate that carbon values of Megafauna (Gomph vs. Equus) from Colombian Tibito sites are normally distributed (p > 0.05). From TTest, with a p value > 0.05 we fail reject the null hypothesis that there is no signicant difference between the Megafauna (Gomph vs. Equus) from Colombian Pleistocene sites.	shapiro.test(Szn.Amp2$C13_Amp); t.test(C13_Amp ~Taxa, Szn.Amp2)	Shapiro-Wilk normality test data: Szn.Amp2$C13_Amp W = 0.87322, p-value = 0.162	Welch Two Sample t-test data: C13_Amp by Taxa t = -2.4907, df = 5.2235, p-value = 0.05304 alternative hypothesis: true difference in means between group Equus and group Gomph is not equal to 0 95 percent confidence interval: -3.6744254 0.0344254 sample estimates: mean in group Equus mean in group Gomph 2.30 4.12
Tibito (w/o TBT-10)	Equus vs. Gomphothere Seasonal Amplitude (Range)	O18	0.5935	Normal				0.001187		Yes	Results from Shapiro indicate that oxygen values of Megafauna (Gomph vs. Equus) from Colombian Tibito sites are normally distributed (p > 0.05). From TTest, with a p value > 0.05 we fail reject the null hypothesis that there is no signicant difference between the Megafauna (Gomph vs. Equus) from Colombian Pleistocene sites.	shapiro.test(Szn.Amp2$O18_Amp); t.test(O18_Amp ~Taxa, Szn.Amp2)	Shapiro-Wilk normality test data: Szn.Amp2$O18_Amp W = 0.93821, p-value = 0.5935	Welch Two Sample t-test data: O18_Amp by Taxa t = -5.894, df = 5.8113, p-value = 0.001187 alternative hypothesis: true difference in means between group Equus and group Gomph is not equal to 0 95 percent confidence interval: -4.528607 -1.856726 sample estimates: mean in group Equus mean in group Gomph 2.444000 5.636667
																	Equus.SA-LP-EH	2.91942	38.9015			0.99		11.7625
																		4.72447	27.342			0.95
																		25.4454	39.1705			0.5
																	Gomphotheriidae.PB-LP	7.89567	41.7383			0.99		19.4801
																		10.3045	33.7959			0.95
																		16.0265	23.3109			0.5
																	Gomphotheriidae.SA-LP	14.2529	23.2015			0.99		18.3634
																		15.2548	21.9157			0.95
																		17.2253	19.5727			0.5
																	Gomphotheriidae.SA-LP-EH	2.86309	71.0439	82.7288	84.4928	0.99		15.2991
																		5.33462	45.0196	NA	NA	0.95
																		11.4541	22.0712	NA	NA	0.5
Tequendama	Deer	d13C enamel	0.099	Normal	0.528	N/A		N/A	N/A	No	Results from Shapiro indicate that carbon values of deer from tequendama zones of occupation are normally distributed (p > 0.05), but ANOVA (p > 0.05) indicates that there is not enough evidence to conclude that the group means are not equal. So TurkeyHSD test would not be appropriate to run. More specifically, this would indicate that there is no strong difference between Carbon values of Deer f…	shapiro.test(TeqDeerStats$dC13); LM1 <- lm(dC13 ~Zone, TeqDeerStats); aov(LM1); summary(aov(LM1))	Shapiro-Wilk normality test data: TeqDeerStats$dC13 W = 0.9324, p-value = 0.09875	Aov(LM1) aov(formula = LM1) Terms: Zone Residuals Sum of Squares 1.731825 15.891391 Deg. of Freedom 3 21 Residual standard error: 0.869904 Estimated effects may be unbalanced Summary Df Sum Sq Mean Sq F value Pr(>F) Zone 3 1.732 0.5773 0.763 0.528 Residuals 21 15.891 0.7567				8.96409	15.4975			0.5
Tequendama	Deer	d18O enamel	0.464	Normal	0.221	N/A		N/A	N/A	No	Results from Shapiro indicate that oxygen values of deer from tequendama zones of occupation are normally distributed (p > 0.05), but ANOVA (p > 0.05) indicates that there is not enough evidence to conclude that the group means are not equal. So TurkeyHSD test would not be appropriate to run. More specifically, this would indicate that there is no strong difference between oxygen values of Deer f…	shapiro.test(TeqDeerStats$dO18); LM2 <- lm(dO18 ~Zone, TeqDeerStats); aov(LM2); summary(aov(LM2))	Shapiro-Wilk normality test data: TeqDeerStats$dO18 W = 0.96237, p-value = 0.4638	aov(formula = LM2) Terms: Zone Residuals Sum of Squares 14.31332 62.82868 Deg. of Freedom 3 21 Residual standard error: 1.729694 Estimated effects may be unbalanced > summary(aov(LM2)) Df Sum Sq Mean Sq F value Pr(>F) Zone 3 14.31 4.771 1.595 0.221 Residuals 21 62.83 2.992
Tequendama	Cavia	d13C enamel	0.553	Normal	0.71	N/A		N/A	N/A	No	Results from Shapiro indicate that carbon values of cavia from tequendama zones of occupation are normally distributed (p > 0.05), but ANOVA (p > 0.05) indicates that there is not enough evidence to conclude that the group means are not equal. So TurkeyHSD test would not be appropriate to run. More specifically, this would indicate that there is no strong difference between Carbon values of cavia…	shapiro.test(TeqCaviaStats$dC13); LM3 <- lm(dC13 ~Zone, TeqCaviaStats); aov(LM3); summary(aov(LM3))	Shapiro-Wilk normality test data: TeqCaviaStats$dC13 W = 0.97478, p-value = 0.5525	aov(formula = LM3) Terms: Zone Residuals Sum of Squares 2.72508 64.65355 Deg. of Freedom 3 33 Residual standard error: 1.399714 Estimated effects may be unbalanced > summary(aov(LM3)) Df Sum Sq Mean Sq F value Pr(>F) Zone 3 2.73 0.9084 0.464 0.71 Residuals 33 64.65 1.9592			Gomphotheriidae.NA-LP	10.4573	44.6207			0.99		23.0857
Tequendama	Cavia	d18O enamel	0.534	Normal	0.159	N/A		N/A	N/A	No	Results from Shapiro indicate that oxygen values of cavia from tequendama zones of occupation are normally distributed (p > 0.05), but ANOVA (p > 0.05) indicates that there is not enough evidence to conclude that the group means are not equal. So TurkeyHSD test would not be appropriate to run. More specifically, this would indicate that there is no strong difference between oxygen values of Deer …	shapiro.test(TeqCaviaStats$dO18); LM4 <- lm(dC13 ~Zone, TeqCaviaStats); aov(LM4); summary(aov(LM4))	Shapiro-Wilk normality test data: TeqCaviaStats$dO18 W = 0.97421, p-value = 0.5338	aov(formula = LM4) Terms: Zone Residuals Sum of Squares 14.69172 87.68436 Deg. of Freedom 3 33 Residual standard error: 1.630062 Estimated effects may be unbalanced > summary(aov(LM4)) Df Sum Sq Mean Sq F value Pr(>F) Zone 3 14.69 4.897 1.843 0.159 Residuals 33 87.68 2.657				13.5122	36.666			0.95
Teq with Aqz	Deer	d13C enamel	0.171	Normal	0.297	N/A		N/A	N/A	No	Results from Shapiro indicate that carbon values of deer from tequendama vs aquazuque zones of occupation are normally distributed (p > 0.05), but ANOVA (p > 0.05) indicates that there is not enough evidence to conclude that the group means are not equal. So TurkeyHSD test would not be appropriate to run. More specifically, this would indicate that there is no strong difference between deer carbo…	shapiro.test(TeqAqzDeerStats$dC13); LM5 <- lm(dC13 ~Zone, TeqAqzDeerStats); aov(LM5); summary(aov(LM5))	Shapiro-Wilk normality test data: TeqAqzDeerStats$dC13 W = 0.95143, p-value = 0.171	aov(formula = LM5) Terms: Zone Residuals Sum of Squares 3.679228 18.451391 Deg. of Freedom 4 26 Residual standard error: 0.8424185 Estimated effects may be unbalanced > summary(aov(LM5)) Df Sum Sq Mean Sq F value Pr(>F) Zone 4 3.679 0.9198 1.296 0.297 Residuals 26 18.451 0.7097				19.5788	26.9547			0.5
Teq with Aqz	Deer	d18O enamel	0.3384	Normal	0.122	N/A		N/A	N/A	No	Results from Shapiro indicate that oxygen values of deer from tequendama vs aquazuque zones of occupation are normally distributed (p > 0.05), but ANOVA (p > 0.05) indicates that there is not enough evidence to conclude that the group means are not equal. So TurkeyHSD test would not be appropriate to run. More specifically, this would indicate that there is no strong difference between oxygen val…	shapiro.test(TeqAqzDeerStats$dO18); LM6 <- lm(dO18 ~Zone, TeqAqzDeerStats) aov(LM6) summary(aov(LM6))	Shapiro-Wilk normality test data: TeqAqzDeerStats$dO18 W = 0.96246, p-value = 0.3384	aov(formula = LM6) Terms: Zone Residuals Sum of Squares 19.82902 64.05076 Deg. of Freedom 4 26 Residual standard error: 1.569551 Estimated effects may be unbalanced > summary(aov(LM6)) Df Sum Sq Mean Sq F value Pr(>F) Zone 4 19.83 4.957 2.012 0.122 Residuals 26 64.05 2.463
Teq vs Aqz	Human	d13C enamel	0.000397	Not Normal	N/A	N/A < 3 Groups Compared		N/A	0.028	Yes	Results from Shapiro indicate that carbon values of Humans from Teuendama vs Aqazuque are not normally distributed (p < 0.05). From Mann-Whitney, with a p value < 0.05 we reject the null hypothesis that there is no signicant difference between Human Carbon values from Teq vs Aqz.	shapiro.test(TeqAqzHumanStats$dC13); wilcox.test(dC13 ~Zone, TeqAqzHumanStats)	Shapiro-Wilk normality test data: TeqAqzHumanStats$dC13 W = 0.54637, p-value = 3.966e-05	Wilcoxon rank sum exact test data: dC13 by Zone W = 29, p-value = 0.02828 alternative hypothesis: true location shift is not equal to 0			Gomphotheriidae.NA-LP-EH	11.4508	75.9643			0.99		31.428
Teq vs Aqz	Human	d18O enamel	0.1016	Normal	N/A	N/A		0.636	N/A	No	Results from Shapiro indicate that carbon values of Humans from Teuendama vs Aqazuque are normally distributed (p > 0.05). From TTest, with a p value > 0.05 we fail reject the null hypothesis that there is no signicant difference between Human Oxygen values from Teq vs Aqz.	shapiro.test(TeqAqzHumanStats$dO18); t.test(dO18 ~Zone, TeqAqzHumanStats)	Shapiro-Wilk normality test data: TeqAqzHumanStats$dO18 W = 0.88502, p-value = 0.1016	For two groups with normal distribution: Welch Two Sample t-test data: dO18 by Zone t = -0.50276, df = 5.0766, p-value = 0.6362 alternative hypothesis: true difference in means between group AQZ and group TEQ3 is not equal to 0 95 percent confidence interval: -1.826938 1.226938 sample estimates: mean in group AQZ mean in group TEQ3 -5.85 -5.55				15.7314	59.4795			0.95

## Sheet: SI_Table4
Equus				Gomphothere
	Var1	Freq			Var1	Freq
1	NA-LP	5		1	NA-LP	13
2	NA-TP-EH	9		2	NA-TP-EH	11
3	PB-LP	19		3	PB-LP	39
4	PB-TPEH	8		4	PB-TP-EH	7
5	SA-LP	17		5	SA-LP	31
6	SA-TP-EH	6		6	SA-TP-EH	47
		Equus.NA-LP	Equus.NA-TP-EH	Equus.PB-LP	Equus.PB-TPEH	Equus.SA-LP	Equus.SA-TP-EH	Isotopic Overlap	Gomphotheriidae.NA-LP	Gomphotheriidae.NA-TP-EH	Gomphotheriidae.PB-LP	Gomphotheriidae.PB-TP-EH	Gomphotheriidae.SA-LP	Gomphotheriidae.SA-TP-EH	These are group metrics not community (Equus, Gomphotheridae) metrics. Use SEAc when our sample sizes are <20 and generally not even. For publication, we will present at one decimalpoint.
TA	Area of convex hull	15.5575	56.3965	35.613	9.2337	47.5365	8.1645	Stnrd Elipses (~40%)	35.8312	62.4466	54.2539	41.7242	36.3809	72.2031
SEA	Standard area ellipses	15.2553	41.894	13.035	5.64557	24.6913	6.32265		13.6675	34.4152	14.2722	28.1656	10.9614	12.4514
SEAc	w/ sample size correction	20.3405	47.8789	13.8018	6.5865	26.3374	7.90332		14.5217	38.2391	14.6579	33.7987	11.3394	12.7281
Isotopic Overlap		Equus.NA-LP	Equus.NA-TP-EH	Overlap					Gomp.NA-LP	Gomp.NA-TP-EH	Overlap
Stnrd Elipses (~40%)		20.3268	47.8468	6.64629	per mil^2	Niche Spaces: Unit is per mil^2. Calcualting overlap niche width. Hight the overlap the higher the shared niche.		Of the total isotopic space occupied by Equus in NA during the LP and TP-EH about 10% is shared.	14.512	38.2135	2.97693	per mil^2	Niche Spaces: Unit is per mil^2. Calcualting overlap niche width. Hight the overlap the higher the shared niche.		Of the total isotopic space occupied by Gomphothere in NA during the LP and TP-EH about 6% is shared.
				0.0974907	Overlap = 9.7						0.0564609	Overlap = 5.7
		Equus.PB-LP	Equus.PB-TPEH						Gomphotheriidae.PB-LP	Gomphotheriidae.PB-TP-EH
		13.7925	6.58207	5.31722	per mil^2			Of the total isotopic space occupied by Equus in PB during the LP and TP-EH about 26% is shared.	14.6481	33.776	11.8164	per mil^2	Niche Spaces: Unit is per mil^2. Calcualting overlap niche width. Hight the overlap the higher the shared niche.		Of the total isotopic space occupied by Gomphothere in PB during the LP and TP-EH about 24% is shared.
				0.260974	Overlap = 26.1						0.244019	Overlap = 24.4
		Equus.NA-LP	Equus.PB-LP						Gomphotheriidae.NA-LP	Gomphotheriidae.PB-LP
		20.3268	13.7925	0	per mil^2	Niche Spaces: Unit is per mil^2. Calcualting overlap niche width. Hight the overlap the higher the shared niche.		Of the total isotopic space occupied by Equus in NA and PB during the LP about 0% is shared.	1.4512	1.46481	4.16334e-16	per mil^2	Niche Spaces: Unit is per mil^2. Calcualting overlap niche width. Hight the overlap the higher the shared niche.		Of the total isotopic space occupied by Gomphothere in NA and PB during the LP about 0% is shared.
				0	Overlap = 0.0						1.42775e-17	Overlap = 0.0
		Equus.NA-TP-EH	Equus.PB-TP-EH						Gomphotheriidae.NA-TP-EH	Gomphotheriidae.PB-TP-EH
		4.78468	6.58207	5.55111e-16	per mil^2			Of the total isotopic space occupied by Equus in NA and PB during the TP-EH about 0% is shared.	38.2135	33.776	12.5631		Niche Spaces: Unit is per mil^2. Calcualting overlap niche width. Hight the overlap the higher the shared niche.		Of the total isotopic space occupied by Gomphothere in NA and PB during the TP-EH about 17% is shared.
				1.01989e-17	Overlap = 0.0						0.174513	Overlap = 17.5
		Equus.SA-LP	Equus.SA-TP-EH						Gomphotheriidae.SA-LP	Gomphotheriidae.SA-TP-EH
		26.3197	7.89801	0	per mil^2	Niche Spaces: Unit is per mil^2. Calcualting overlap niche width. Hight the overlap the higher the shared niche.		Of the total isotopic space occupied by Equus in SA during the LP and TP-EH about 0% is shared.	11.3318	12.7196	8.36783		Niche Spaces: Unit is per mil^2. Calcualting overlap niche width. Hight the overlap the higher the shared niche.		Of the total isotopic space occupied by Gomphothere in SA during the LP and TP-EH about 35% is shared.
				0	Overlap = 0.0						0.347915	Overlap = 34.8
		Equus.NA-LP	Equus.SA-LP						Gomphotheriidae.NA-LP	Gomphotheriidae.SA-LP
		20.3268	26.3197	9.29812e-16	per mil^2	Niche Spaces: Unit is per mil^2. Calcualting overlap niche width. Hight the overlap the higher the shared niche.		Of the total isotopic space occupied by Equus in NA and SA during the LP about 0% is shared.	14.512	11.3318	0		Niche Spaces: Unit is per mil^2. Calcualting overlap niche width. Hight the overlap the higher the shared niche.		Of the total isotopic space occupied by Gomphothere in NA and SA during the LP about 0% is shared.
				1.99332e-17	Overlap = 0.0						0	Overlap = 0.0
		Equus.NA-TP-EH	Equus.SA-TP-EH						Gomphotheriidae.NA-TP-EH	Gomphotheriidae.SA-TP-EH
		47.8468	7.89801	2.42861e-17	per mil^2	Niche Spaces: Unit is per mil^2. Calcualting overlap niche width. Hight the overlap the higher the shared niche.		Of the total isotopic space occupied by Equus in NA and SA during the TP-EH about 0% is shared.	38.2135	12.7196	2.96927		Niche Spaces: Unit is per mil^2. Calcualting overlap niche width. Hight the overlap the higher the shared niche.		Of the total isotopic space occupied by Gomphothere in NA and SA during the TP-EH about 6% is shared.
				4.35667e-19	Overlap = 0.0						0.0582975	Overlap = 5.8
		Equus.SA-LP	Equus.PB-LP						Gomphotheriidae.SA-LP	Gomphotheriidae.PB-LP
		20.4947	13.7925	1.68268e-16	per mil^2	Niche Spaces: Unit is per mil^2. Calcualting overlap niche width. Hight the overlap the higher the shared niche.		Of the total isotopic space occupied by Equus in SA and PB during the LP about 0% is shared.	11.3318	14.6481	0		Niche Spaces: Unit is per mil^2. Calcualting overlap niche width. Hight the overlap the higher the shared niche.		Of the total isotopic space occupied by Gomphothere in SA and PB during the LP about 0% is shared.
				4.90762e-18	Overlap = 0.0						0	Overlap = 0.0
		Equus.SA-TP-EH	Equus.PB-TP-EH						Gomphotheriidae.SA-TP-EH	Gomphotheriidae.PB-TP-EH
		7.89801	6.58207	0	per mil^2	Niche Spaces: Unit is per mil^2. Calcualting overlap niche width. Hight the overlap the higher the shared niche.		Of the total isotopic space occupied by Equus in SA and PB during the TPEH about 0% is shared.	12.7196	33.776	0		Niche Spaces: Unit is per mil^2. Calcualting overlap niche width. Hight the overlap the higher the shared niche.		Of the total isotopic space occupied by Gomphothere in SA and PB during the TP-EH about 0% is shared.
				0	Overlap = 0.0						0	Overlap = 0.0

## Sheet: SI_Table5_Carbon
Standard uncertainty calculator for d13C				Calibration Standards																						Check Standards				Sample Replicates
Name:				603	CO8	NBS18	603	CO8	NBS18	603	CO8	NBS18	603	CO8	NBS18	603	CO8	NBS18	603	CO8	NBS18	603	CO8	NBS18		Horse Standard: Maximus				TBT-11-07	TBT-07-04	ZJN-01-04	HS
Analytical Session				1	1	1	2	2	2	3	3	3	4	4	4	5	5	5	6	6	6	7	7	7		~4 (2022-07)	~6 (2022-12)	~7 (2023-03)		8	8	8	8
Known delta:				2.46	-5.764	-5.014	2.46	-5.764	-5.014	2.46	-5.764	-5.014	2.46	-5.764	-5.014	2.46	-5.764	-5.014	2.46	-5.764	-5.014	2.46	-5.764	-5.014		-12.4	-12.4	-12.4
Standard deviation:				0.01	0.032	0.035	0.01	0.032	0.035	0.01	0.032	0.035	0.01	0.032	0.035	0.01	0.032	0.035	0.01	0.03	0.04	0.01	0.03	0.04		0.2	0.2	0.2
Measured mean:				2.46333	-5.5	-5.06667	2.46667	-5.71333	-5.07333	2.46667	-5.71667	-5.06333	2.46333	-5.74667	-5.03333	2.46333	-5.69	-5.09333	2.47	-5.67333	-5.11	2.46667	-5.66	-5.13		-12.62	-12.38	-12.67		-8.56	-8.64	-9.23	-11.6733
Measured StDev:				0.0305505	0.372424	0.0602771	0.0862168	0.046188	0.0550757	0.0416333	0.120968	0.0873689	0.0945163	0.064291	0.0378594	0.0665833	0.190526	0.0665833	0.14	0.280238	0.06245	0.080829	0.165227	0.153948		0.198494	0.19799	0.381838	#DIV/0!	0.353553	0.367696	0.282843	0.134288
Number measured:				3	3	3	3	3	3	3	3	3	3	3	3	3	3	3	3	3	3	3	3	3		4	2	2		2	2	2	3
ΔMeasured−Known				0.00333333	0.264	-0.0526667	0.00666667	0.0506667	-0.0593333	0.00666667	0.0473333	-0.0493333	0.00333333	0.0173333	-0.0193333	0.00333333	0.074	-0.0793333	0.01	0.0906667	-0.096	0.00666667	0.104	-0.116		-0.22	0.02	-0.27
ssrm	0.153082			0.00186667	0.2774	0.00726667	0.0148667	0.00426667	0.00606667	0.00346667	0.0292667	0.0152667	0.0178667	0.00826667	0.00286667	0.00886667	0.0726	0.00886667	0.0392	0.157067	0.0078	0.0130667	0.0546	0.0474		0.1182	0.0392	0.1458		0.125	0.1352	0.08	0.0360667
dfsrm		47
srep	0.274323
dfrep		5
u(Rw)	0.247105
RMSbias	0.201412
u(Cref)	0.2
u(bias)	0.283843
Standard Uncertainty (uc)	0.376334
1				2.49	-5.07	-5.06	2.56	-5.66	-5.01	2.5	-5.58	-5.04	2.57	-5.7	-5.05	2.54	-5.47	-5.06	2.63	-5.36	-5.16	2.42	-5.5	-5.3		-12.47	-12.52	-12.4		-8.81	-8.9	-9.43	-11.77
2				2.43	-5.72	-5.01	2.45	-5.74	-5.11	2.42	-5.76	-4.99	2.43	-5.72	-4.99	2.43	-5.8	-5.17	2.41	-5.9	-5.04	2.56	-5.65	-5.09		-12.91	-12.24	-12.94		-8.31	-8.38	-9.03	-11.73
3				2.47	-5.71	-5.13	2.39	-5.74	-5.1	2.48	-5.81	-5.16	2.39	-5.82	-5.06	2.42	-5.8	-5.05	2.37	-5.76	-5.13	2.42	-5.83	-5		-12.58							-11.52
4																										-12.52
5
6
7
8
9
10
11
12
13
14
15
16
17
18
19
20
21
22
23
24
25
26
27
28
29
30
31
32
33
34
35
36
37
38
39
40
41
42
43
44
45
46
47
48
49
50
51
52
53
54
55
56
57
58
59
60
61
62
63
64
65
66
67
68
69
70
71
72
73
74
75
76
77
78
79
80
81
82
83
84
85
86
87
88
89
90
91
92
93
94
95
96
97
98
99
100
101
102
103
104
105
106
107
108
109
110
111
112
113
114
115
116
117
118
119
120
121
122
123
124
125
126
127
128
129
130
131
132
133
134
135
136
137
138
139
140
141
142
143
144
145
146
147
148
149
150
151
152
153
154
155
156
157
158
159
160
161
162
163
164
165
166
167
168
169
170
171
172
173
174
175
176
177
178
179
180
181
182
183
184
185
186
187
188
189
190
191
192
193
194
195
196
197
198
199
200

## Sheet: SI_Table5_Oxygen
Standard uncertainty calculator for d18O				Calibration Standards																						Check Standards				Samle Replicates
Name:				603	CO8	NBS18	603	CO8	NBS18	603	CO8	NBS18	603	CO8	NBS18	603	CO8	NBS18	603	CO8	NBS18	603	CO8	NBS18		Horse Standard: Maximus				TBT-11-07	TBT-07-04	ZJN-01-04	HS
Analytical Session				1	1	1	2	2	2	3	3	3	4	4	4	5	5	5	6	6	6	7	7	7		~4 (2022-07)	~6 (2022-12)	~7 (2023-03)		8	8	8	8
Known delta:				-2.37	-22.7	-23.2	-2.37	-22.7	-23.2	-2.37	-22.7	-23.2	-2.37	-22.7	-23.2	-2.37	-22.7	-23.2	-2.37	-22.7	-23.2	-2.37	-22.7	-23.2		-7.4	-7.4	-7.4
Standard deviation:				0.04	0.2	0.1	0.04	0.2	0.1	0.04	0.2	0.1	0.04	0.2	0.1	0.04	0.2	0.1	0.04	0.2	0.1	0.04	0.2	0.1		0.2	0.2	0.2
Measured mean:				-2.36992	-22.9468	-22.9532	-2.36667	-22.9633	-22.9367	-2.36872	-22.8753	-23.0259	-2.37111	-22.3682	-22.91	-2.36864	-22.8654	-23.036	-2.36861	-22.789	-23.1124	-2.36667	-22.8033	-23.1033		-7.1875	-7.16	-7.36		-7.47	-4.93	-7.73	-6.70333
Measured StDev:				0.186492	0.36294	0.200112	0.187172	0.120554	0.140475	0.146235	0.177509	0.0990835	0.178728	1.07593	0.180286	0.245537	0.132271	0.128823	0.183111	0.127848	0.0838665	0.117189	0.150444	0.191398		0.103078	0.0565685	0.0141421		0.141421	0.0989949	0.254558	0.155027
Number measured:				3	3	3	3	3	3	3	3	3	3	3	3	3	3	3	3	3	3	3	3	3		4	2	2		2	2	2	3
ΔMeasured−Known				7.65562e-05	-0.246846	0.24677	0.00333333	-0.263333	0.263333	0.00127829	-0.17534	0.174061	-0.00111078	0.331829	0.290036	0.00136496	-0.165409	0.164044	0.00138733	-0.0889792	0.0875919	0.00333333	-0.103333	0.0966667		0.2125	0.24	0.04
ssrm	0.276956			0.0695582	0.26345	0.0800894	0.0700667	0.0290667	0.0394667	0.0427691	0.0630191	0.0196351	0.0638872	2.31524	0.0650064	0.120577	0.0349912	0.0331906	0.0670591	0.0326902	0.0140672	0.0274667	0.0452667	0.0732667		0.031875	0.0032	0.0002		0.02	0.0098	0.0648	0.0480667
dfsrm		47
srep	0.168918
dfrep		5
u(Rw)	0.301614
RMSbias	0.186508
u(Cref)	0.2
u(bias)	0.273469
Standard Uncertainty (uc)	0.407132
1				-2.25886	-22.5278	-22.886	-2.29	-22.85	-22.79	-2.23729	-22.6994	-23.015	-2.23534	-22.9488	-22.7577	-2.10405	-22.9775	-22.8927	-2.18576	-22.7654	-23.1104	-2.28	-22.88	-22.9		-7.29	-7.12	-7.37		-7.57	-5	-7.91	-6.55
2				-2.26568	-23.1545	-22.7954	-2.23	-22.95	-22.95	-2.34264	-22.8722	-22.9328	-2.3044	-21.1267	-22.8632	-2.41269	-22.7195	-23.073	-2.36811	-22.927	-23.0296	-2.32	-22.63	-23.13		-7.26	-7.2	-7.35		-7.37	-4.86	-7.55	-6.86
3				-2.58523	-23.1582	-23.1783	-2.58	-23.09	-23.07	-2.52624	-23.0544	-23.1301	-2.5736	-23.0291	-23.109	-2.58916	-22.8992	-23.1422	-2.55198	-22.6746	-23.1973	-2.5	-22.9	-23.28		-7.08							-6.7
4																										-7.12
5
6
7
8
9
10
11
12
13
14
15
16
17
18
19
20
21
22
23
24
25
26
27
28
29
30
31
32
33
34
35
36
37
38
39
40
41
42
43
44
45
46
47
48
49
50
51
52
53
54
55
56
57
58
59
60
61
62
63
64
65
66
67
68
69
70
71
72
73
74
75
76
77
78
79
80
81
82
83
84
85
86
87
88
89
90
91
92
93
94
95
96
97
98
99
100
101
102
103
104
105
106
107
108
109
110
111
112
113
114
115
116
117
118
119
120
121
122
123
124
125
126
127
128
129
130
131
132
133
134
135
136
137
138
139
140
141
142
143
144
145
146
147
148
149
150
151
152
153
154
155
156
157
158
159
160
161
162
163
164
165
166
167
168
169
170
171
172
173
174
175
176
177
178
179
180
181
182
183
184
185
186
187
188
189
190
191
192
193
194
195
196
197
198
199
200
